# Supplementary material
Source: PubMed Central journal article supplement (PMC296995)
Supplement: jcinvest_112_12_1796__1.pdf [file jcinvest_112_12_1796__1.pdf]

## Supplemental DATA Table 1

Weisberg et al. Adipose tissue transcripts whose expression correlate with body mass

| Affymetrix Probe Set | ktau       | p-value  | klaunder | Affymetrix Transcript Description                                                                                                                                                                                      |
|----------------------|------------|----------|----------|------------------------------------------------------------------------------------------------------------------------------------------------------------------------------------------------------------------------|
| 160101_at            | 0.8290964  | 1.38E-08 | 1        | Cluster lnc1 X56824:Heme oxygenase (decycling) 1 (cds=(128,997)/gb=X56824/ig=452328/ug=Mm.17980/len=1564/NOTE=replacement for probe set(s) 93291_at on MG-U74A                                                         |
| 100607_at            | 0.8218236  | 1.84E-08 | 2        | Cluster lnc1 AF026124:Mus musculus schwannoma-associated protein (SAM9) mRNA, complete cds (cds=(417,1883)/gb=AF026124/ig=2565395/ug=Mm.6483/len=2246                                                                  |
| 99071_at             | 0.778187   | 9.96E-08 | 3        | Cluster lnc1 L20315:Mus musculus MP51 gene and mRNA, 3 end (cds=(155,2142)/gb=L20315/ig=431419/ug=Mm.3999/len=4231                                                                                                     |
| 1044531_at           | 0.7709142  | 1.31E-07 | 4        | Cluster lnc1 X03304:Protein kinase C, delta (cds=(13,20326)/gb=X03304/ig=53436/len=2539                                                                                                                                |
| 160162_at            | 0.7709142  | 1.31E-07 | 5        | Cluster lnc1 AI82545:U1-M-BHO-ahw-04-0-U1.s1 Mus musculus cDNA, 3 end (clone=U1-M-BHO-ahw-04-0-U1/clone_end=3/ig=AI82545/ig=5496451/ug=Mm.22632/len=320/NOTE=replacement for probe set(s) 94310_at on MG-U74A          |
| 99994_at             | -0.770914  | 1.31E-07 | 6        | Cluster lnc1 AF041376:Mus musculus cell death activator CIDE-A (Cide-a)-13A, complete cds (cds=(213,866)/gb=AF041376/ig=3114591/ug=Mm.449/len=1114                                                                     |
| 95084_f_at           | -0.770914  | 1.31E-07 | 7        | Cluster lnc1 AI844995:U1-M-BG0-ahu-e-03-0-U1.s1 Mus musculus cDNA, 3 end (clone=U1-M-BG0-ahu-e-03-0-U1/clone_end=3/ig=AI844995/ig=5488901/ug=Mm.29256/len=218                                                          |
| 103600_at            | -0.770914  | 1.31E-07 | 8        | Cluster lnc1 AF03869:Mus musculus peroxisomal biogenesis factor (Pex11a) mRNA, complete cds (cds=(60,800)/gb=AF03869/ig=3907591/ug=Mm.20615/len=879                                                                    |
| 92893_f_at           | -0.763641  | 1.71E-07 | 9        | Cluster lnc1 D90173:Mouse mRNA for NFL-B protein, clone NFL-B2 (cds=(111,1709)/gb=D90173/ig=220518/ug=Mm.4771/len=3206                                                                                                 |
| 92615_at             | -0.763641  | 1.71E-07 | 10       | Cluster lnc1 AI83615:U1-M-BHO-ajp-f09-0-U1.s1 Mus musculus cDNA, 3 end (clone=U1-M-BHO-ajp-f09-0-U1/clone_end=3/ig=AI83615/ig=5497521/ug=Mm.1103/len=542                                                               |
| 101793_at            | 0.756386   | 2.24E-07 | 11       | Cluster lnc1 X70980:Fc receptor, IgG, high affinity 1 (cds=(0,1010)/gb=X70980/ig=311748/ug=Mm.57131/len=1011                                                                                                           |
| 95472_f_at           | -0.756389  | 2.24E-07 | 12       | Cluster lnc1 AI26992:ig47g07.x1 Mus musculus cDNA, 3 end (clone=IMAGE-1923132/clone_end=3/ig=AI26992/ig=4441037/ug=Mm.24805/len=484                                                                                    |
| 95055_s_at           | -0.753369  | 2.24E-07 | 13       | Cluster lnc1 AA87469:vg2d0r1.s1 Mus musculus cDNA, 5 end (clone=IMAGE-1093063/clone_end=5/ig=AA87469/ig=2651908/ug=Mm.29141/len=414                                                                                    |
| 100012_at            | 0.7490599  | 2.92E-07 | 14       | Cluster lnc1 U29539:Mus musculus retinoic acid-inducible E3 protein mRNA, complete cds (cds=UNKNOWN/ig=U29539/ig=924941/ug=Mm.4554/len=2450                                                                            |
| 100511_at            | 0.7490599  | 2.92E-07 | 15       | Cluster lnc1 AI154249:ud30f1r1.s1 Mus musculus cDNA, 5 end (clone=IMAGE-1447439/clone_end=5/ig=AI154249/ig=3682718/ug=Mm.5202/len=359                                                                                  |
| 103016_s_at          | 0.7490599  | 2.92E-07 | 16       | Cluster lnc1 X68273:CD68 antigen (cds=(91,1071)/gb=X68273/ig=52988/ug=Mm.15819/len=1234                                                                                                                                |
| 93316_at             | 0.7490599  | 2.92E-07 | 17       | Cluster lnc1 U91513:Mus musculus adhesion molecule n1juntm mRNA, complete cds (cds=(16,474)/gb=U91513/ig=307700/ug=Mm.18503/len=1150                                                                                   |
| 100070_at            | -0.749096  | 2.92E-07 | 18       | Cluster lnc1 AI84556:U1-M-AJ1-ahb-b-05-0-U1.s1 Mus musculus cDNA, 3 end (clone=U1-M-AJ1-ahb-b-05-0-U1/clone_end=3/ig=AI84556/ig=5489462/ug=Mm.4537/len=428                                                             |
| 95339_f_at           | 0.7418231  | 3.80E-07 | 19       | Cluster lnc1 M82831:Macrophage metalloelastase (cds=(0,1388)/gb=M82831/ig=199127/ug=Mm.2055/len=1790                                                                                                                   |
| 95338_s_at           | 0.7418231  | 3.80E-07 | 20       | Cluster lnc1 M82831:Macrophage metalloelastase (cds=(0,1388)/gb=M82831/ig=199127/ug=Mm.2055/len=1790                                                                                                                   |
| 100771_at            | 0.7418231  | 3.80E-07 | 21       | Cluster lnc1 AF08182:Mus musculus B cell linker protein BLNK mRNA, complete cds (cds=(132,1505)/gb=AF08182/ig=3406752/ug=Mm.9749/len=1719                                                                              |
| 100564_at            | -0.741823  | 3.80E-07 | 22       | Cluster lnc1 AF08199:D-dopachrome tautomerase (cds=(0,356)/gb=AF08199/ig=3452318/ug=Mm.5731/len=357                                                                                                                    |
| 93323_at             | 0.7345503  | 4.94E-07 | 23       | Cluster lnc1 AB031292:Mus musculus Plp2 mRNA for proteolipid protein 2, complete cds (cds=(58,516)/gb=AB031292/ig=5771450/ug=Mm.18565/len=603                                                                          |
| 100621_at            | 0.7345503  | 4.94E-07 | 24       | Cluster lnc1 AI848825:U1-M-AJ1-ahb-b-03-0-U1.s1 Mus musculus cDNA, 3 end (clone=U1-M-AJ1-ahb-b-03-0-U1/clone_end=3/ig=AI848825/ig=5492731/ug=Mm.6586/len=342                                                           |
| 94255_at             | 0.7345503  | 4.94E-07 | 25       | Cluster lnc1 L07918:Mus musculus GDP-dissociation inhibitor mRNA, preferentially expressed in hematopoietic cells, complete cds (cds=(32,634)/gb=L07918/ig=193461/len=1999                                             |
| 99154_s_at           | -0.73455   | 4.94E-07 | 26       | Cluster lnc1 AW122625:U1-M-BH2-2-aa-c-04-0-U1.s1 Mus musculus cDNA, 3 end (clone=U1-M-BH2-2-aa-c-04-0-U1/clone_end=3/ig=AW122625/ig=6098152/ug=Mm.41563/len=358                                                        |
| 101525_at            | -0.73455   | 4.94E-07 | 27       | Cluster lnc1 AI848871:U1-M-AJ1-ahb-b-06-0-U1.s1 Mus musculus cDNA, 3 end (clone=U1-M-AJ1-ahb-b-06-0-U1/clone_end=3/ig=AI848871/ig=5492777/ug=Mm.8688/len=353                                                           |
| 94840_at             | 0.7272775  | 6.39E-07 | 28       | Cluster lnc1 U06837:Hexosaminidase A (cds=(150,1736)/gb=U06837/ig=2182207/ug=Mm.2284/len=1960                                                                                                                          |
| 96562_at             | 0.7272775  | 6.39E-07 | 29       | Cluster lnc1 L13732:Natural resistance-associated macrophage protein 1 (cds=(90,1736)/gb=L13732/ig=474903/ug=Mm.2913/len=2283                                                                                          |
| 104388_at            | 0.7272775  | 6.39E-07 | 30       | Cluster lnc1 U49513:Small inducible cytokine A9 (cds=(28,396)/ig=U49513/ig=1234834/ug=Mm.2271/len=1118                                                                                                                 |
| 96360_at             | -0.7272775 | 6.39E-07 | 31       | Cluster lnc1 AW125498:U1-M-BH2-2-aa-c-11-0-U1.s1 Mus musculus cDNA, 3 end (clone=U1-M-BH2-2-aa-c-11-0-U1/clone_end=3/ig=AW125498/ig=6101028/ug=Mm.30016/len=389                                                        |
| 100293_at            | -0.727278  | 6.39E-07 | 32       | Cluster lnc1 AA226883:vb01d00.r1 Mus musculus cDNA, 5 end (clone=IMAGE-747665/clone_end=5/ig=AA226883/ig=1905739/ug=Mm.86378/len=435                                                                                   |
| 103507_at            | 0.7200048  | 8.26E-07 | 33       | Cluster lnc1 X93328:EGF-like module containing, mucin-like, hormone receptor-like sequence 1 (cds=(36,2831)/gb=X93328/ig=1223768/ug=Mm.2254/len=3286                                                                   |
| 96056_at             | 0.7200048  | 8.26E-07 | 34       | Cluster lnc1 X80638:Mus musculus rhoC mRNA (cds=(40,621)/gb=X80638/ig=1279555/ug=Mm.262/len=1036                                                                                                                       |
| 95486_at             | 0.7200048  | 8.26E-07 | 35       | Cluster lnc1 AI87006:U1-M-AJ0-aa-z-01-0-U1.s1 Mus musculus cDNA, 3 end (clone=U1-M-AJ0-aa-z-01-0-U1/clone_end=3/ig=AI87006/ig=5471219/ug=Mm.24758/len=324                                                              |
| 102204_at            | 0.712732   | 1.06E-06 | 36       | Cluster lnc1 L36435:Kreisel (maf-related) leucine zipper protein (cds=(169,1140)/gb=L36435/ig=625043/ug=Mm.10216/len=1458                                                                                              |
| 94208_at             | 0.712732   | 1.06E-06 | 37       | Cluster lnc1 AW045202:U1-M-BH1-ahb-c-08-0-U1.s1 Mus musculus cDNA, 3 end (clone=U1-M-BH1-ahb-c-08-0-U1/clone_end=3/ig=AW045202/ig=5905731/ug=Mm.2220/len=430                                                           |
| 92471_f_at           | 0.7054992  | 1.37E-06 | 38       | Cluster lnc1 AF099973:Mus musculus schlafen2 (Slfn2) mRNA, complete cds (cds=(182,1318)/gb=AF099973/ig=3983149/ug=Mm.41234/len=1684                                                                                    |
| 104308_at            | 0.7054992  | 1.37E-06 | 39       | Cluster lnc1 AI035495:U48602.r1 Mus musculus cDNA, 5 end (clone=IMAGE-1380939/clone_end=5/ig=AI035495/ig=3259205/ug=Mm.2378/len=332                                                                                    |
| 101867_at            | -0.705459  | 1.37E-06 | 40       | Cluster lnc1 U11680:Mus musculus glyceraldehyde 3-phosphate dehydrogenase, nuclear gene encoding mitochondrial protein, 5' region and partial cds (cds=(411,425)/gb=U11680/ig=789006/ug=Mm.87773/len=426               |
| 95620_at             | -0.705459  | 1.37E-06 | 41       | Cluster lnc1 AW120882:U1-M-BH2-3-aa-a-10-0-U1.s1 Mus musculus cDNA, 3 end (clone=U1-M-BH2-3-aa-a-10-0-U1/clone_end=3/ig=AW120882/ig=6096215/ug=Mm.2804/len=327                                                         |
| 101538_f_at          | -0.705459  | 1.37E-06 | 42       | Cluster lnc1 AW226939:um6407.y1 Mus musculus cDNA, 5 end (clone=IMAGE-2286132/clone_end=5/ig=AW226939/ig=6556235/ug=Mm.8078/len=486                                                                                    |
| 102851_s_at          | 0.703977   | 1.48E-06 | 43       | Cluster lnc1 H6902:Hemopoietic cell phosphatase (cds=(153,1940)/gb=H6902/ig=193807/ug=Mm.1484/len=2163                                                                                                                 |
| 93598_at             | 0.6981864  | 1.75E-06 | 44       | Cluster lnc1 AI840437:U1-M-AN0-aa-c-04-0-U1.s1 Mus musculus cDNA, 3 end (clone=U1-M-AN0-aa-c-04-0-U1/clone_end=3/ig=AI840437/ig=5474650/ug=Mm.20847/len=287                                                            |
| 103865_at            | 0.6981864  | 1.75E-06 | 45       | Cluster lnc1 U59488:Neurokinin cytosolic protein 4 (cds=(192,1211)/gb=U59488/ig=169865/ug=Mm.2968/len=1410                                                                                                             |
| 96020_at             | 0.6981864  | 1.75E-06 | 46       | Cluster lnc1 M22531:Mouse complement C1q B chain mRNA, complete cds (cds=(156,917)/gb=M22531/ig=192266/ug=Mm.2570/len=1059                                                                                             |
| 100328_s_at          | 0.6981864  | 1.75E-06 | 47       | Cluster lnc1 U66684:Paired-Ig-like receptor A3 (cds=(10,2001)/ig=U66684/ig=2138356/ug=Mm.87801/len=2101                                                                                                                |
| 95151_at             | 0.6981864  | 1.75E-06 | 48       | Cluster lnc1 AW061307:U1-M-BH1-ahw-d-02-0-U1.s1 Mus musculus cDNA, 3 end (clone=U1-M-BH1-ahw-d-02-0-U1/clone_end=3/ig=AW061307/ig=6009058/ug=Mm.29475/len=438                                                          |
| 104022_at            | 0.6981864  | 1.75E-06 | 49       | Cluster lnc1 AW094457:U1-M-BH1-ahw-f-12-0-U1.s1 Mus musculus cDNA, 3 end (clone=U1-M-BH1-ahw-f-12-0-U1/clone_end=3/ig=AW094457/ig=6008208/ug=Mm.2699/len=529                                                           |
| 103579_at            | 0.6981864  | 1.75E-06 | 50       | Cluster lnc1 X55247:Mus musculus EN7 mRNA (cds=(36,614)/gb=X55247/ig=50836/ug=Mm.1672/len=1255                                                                                                                         |
| 95465_s_at           | 0.6981864  | 1.75E-06 | 51       | Cluster lnc1 AI849857:U1-M-AH1-ahg-e-02-0-U1.s1 Mus musculus cDNA, 3 end (clone=U1-M-AH1-ahg-e-02-0-U1/clone_end=3/ig=AI849857/ig=5493493/ug=Mm.24750/len=310                                                          |
| 92799_g_at           | -0.698186  | 1.75E-06 | 52       | Cluster lnc1 AA870675:vg24f11.r1 Mus musculus cDNA, 5 end (clone=IMAGE-1095213/clone_end=5/ig=AA870675/ig=2966120/ug=Mm.12677/len=405                                                                                  |
| 104762_at            | -0.698186  | 1.75E-06 | 53       | Cluster lnc1 AB028863:Mus musculus mRNA for MIMP19, complete cds (cds=(5,730)/gb=AB028863/ig=103282/ug=Mm.24772/len=940                                                                                                |
| 93143_at             | -0.698186  | 1.75E-06 | 54       | Cluster lnc1 AI84196:U1-M-AH1-ahb-a-11-0-U1.s1 Mus musculus cDNA, 3 end (clone=U1-M-AH1-ahb-a-11-0-U1/clone_end=3/ig=AI84196/ig=5488102/ug=Mm.5185/len=351                                                             |
| 101539_f_at          | -0.698186  | 1.75E-06 | 55       | Cluster lnc1 AW226939:um6407.y1 Mus musculus cDNA, 5 end (clone=IMAGE-2286132/clone_end=5/ig=AW226939/ig=6556235/ug=Mm.8078/len=486                                                                                    |
| 94365_at             | -0.698186  | 1.75E-06 | 56       | Cluster lnc1 AA710175:v49a11.r1 Mus musculus cDNA, 5 end (clone=IMAGE-1166396/clone_end=5/ig=AA710175/ig=2720093/ug=Mm.25285/len=481                                                                                   |
| 94278_at             | 0.6909137  | 2.25E-06 | 57       | Cluster lnc1 D37837:Mouse mRNA for 65-kDa macrophage cytosolic protein, complete cds (cds=(36,1919)/gb=D37837/ig=984635/ug=Mm.22510/len=2023                                                                           |
| 103690_at            | 0.6909137  | 2.25E-06 | 58       | Cluster lnc1 AW125574:U1-M-BH2-2-aa-c-05-0-U1.s1 Mus musculus cDNA, 3 end (clone=U1-M-BH2-2-aa-c-05-0-U1/clone_end=3/ig=AW125574/ig=6101104/ug=Mm.23955/len=566                                                        |
| 95661_f_at           | 0.6909137  | 2.25E-06 | 59       | Cluster lnc1 L08115:CD9 antigen (cds=(54,734)/gb=L08115/ig=388911/ug=Mm.2956/len=1130                                                                                                                                  |
| 102914_s_at          | 0.6909137  | 2.25E-06 | 60       | Cluster lnc1 U23778:Mus musculus hematopoietic-specific early-response A1-b protein (A1b) gene (cds=(131,649)/gb=U23778/ig=2822186/ug=Mm.16105/len=796                                                                 |
| 160661_at            | -0.690914  | 2.25E-06 | 61       | Cluster lnc1 AI840615:U1-M-AM0-aa-d-e-02-0-U1.s1 Mus musculus cDNA, 3 end (clone=U1-M-AM0-aa-d-e-02-0-U1/clone_end=3/ig=AI840615/ig=5474828/ug=Mm.21110/len=429/NOTE=replacement for probe set(s) 103864_at on MG-U74A |
| 96730_at             | -0.690914  | 2.25E-06 | 62       | Cluster lnc1 X81323:Tripeptidyl peptidase 1 (cds=(83,3871)/gb=X81323/ig=575954/ug=Mm.28867/len=4650                                                                                                                    |
| 103691_at            | -0.689341  | 2.87E-06 | 72       | Cluster lnc1 AI849453:U1-M-AH1-ahg-f-11-0-U1.s1 Mus musculus cDNA, 3 end (clone=U1-M-AH1-ahg-f-11-0-U1/clone_end=3/ig=AI849453/ig=5402359/ug=Mm.29032/len=496                                                          |
| 160480_at            | 0.6836409  | 2.87E-06 | 64       | Cluster lnc1 L24118:Tumor necrosis factor induced protein 2 (cds=(105,2057)/gb=L24118/ig=400371/ug=Mm.4348/len=3512/NOTE=replacement for probe set(s) 99634_at on MG-U74A                                              |
| 160698_s_at          | 0.6836409  | 2.87E-06 | 65       | Cluster lnc1 AB011812:Mus musculus mRNA for FKBP delta I1, complete cds (cds=(2,2105)/gb=AB011812/ig=4115529/ug=Mm.2314/len=2646/NOTE=replacement for probe set(s) 104530_s_at on MG-U74A                              |
| 100927_at            | 0.6836409  | 2.87E-06 | 66       | Cluster lnc1 U28960:Phospholipid transfer protein (cds=(0,1475)/gb=U28960/ig=902887/ug=Mm.6105/len=1590                                                                                                                |
| 93426_at             | 0.6836409  | 2.87E-06 | 67       | Cluster lnc1 AF028725:Mus musculus interferon regulatory factor 5 (mif5) mRNA, complete cds (cds=(53,1546)/gb=AF028725/ig=2565422/ug=Mm.6479/len=2086                                                                  |
| 98104_at             | 0.6836409  | 2.87E-06 | 68       | Cluster lnc1 AI842890:U1-M-AH1-ahb-g-01-0-U1.s1 Mus musculus cDNA, 3 end (clone=U1-M-AH1-ahb-g-01-0-U1/clone_end=3/ig=AI842890/ig=5477102/ug=Mm.3479/len=304                                                           |
| 94425_at             | 0.6836409  | 2.87E-06 | 69       | Cluster lnc1 AB07599:Mus musculus mRNA for MD-1, complete cds (cds=(94,582)/gb=AB07599/ig=3426168/ug=Mm.2639/len=903                                                                                                   |
| 93392_at             | -0.683641  | 2.87E-06 | 70       | Cluster lnc1 AB010742:Uncoupling protein 3, mitochondrial (cds=(197,1123)/gb=AB010742/ig=3062840/ug=Mm.6254/len=2460                                                                                                   |
| 94241_at             | -0.683641  | 2.87E-06 | 71       | Cluster lnc1 AI837229:U1-M-AK0-aa-d-e-06-0-U1.s1 Mus musculus cDNA, 3 end (clone=U1-M-AK0-aa-d-e-06-0-U1/clone_end=3/ig=AI837229/ig=5471482/ug=Mm.2235/len=492                                                         |
| 102087_at            | -0.683641  | 2.87E-06 | 72       | Cluster lnc1 L02331:Sulfotransferase 1 (cds=UNKNOWN/ig=U201089/ug=Mm.17339/len=1223                                                                                                                                    |
| 102561_at            | -0.683641  | 2.87E-06 | 73       | Cluster lnc1 U59282:Mus musculus F1F0 ATP synthase E subunit pseudogene (cds=(0,387)/gb=U59282/ig=1491940/ug=Mm.57218/len=368                                                                                          |
| 92541_at             | -0.683641  | 2.87E-06 | 74       | Cluster lnc1 X12973:Murine MLC1F/MLC3F gene for myosin alkali light chain (exon 1) (fast skeletal muscle isoform) (cds=(125,238)/gb=X12973/ig=53140/ug=Mm.1000/len=250                                                 |
| 102326_at            | 0.6763881  | 3.65E-06 | 75       | Cluster lnc1 AB002684:Mus musculus mRNA for p67pho, complete cds (cds=(96,1673)/gb=AB002684/ig=3061283/ug=Mm.1879/len=1813                                                                                             |
| 98059_s_at           | 0.6763881  | 3.65E-06 | 76       | Cluster lnc1 D49733:Lamin A (cds=(0,1388)/ig=D49733/ig=1838920/ug=Mm.3438/len=1480                                                                                                                                     |
| 160400_at            | 0.6763881  | 3.65E-06 | 77       | Cluster lnc1 AJ006833:Mus musculus cdk gene (cds=(37,1946)/gb=AJ006833/ig=355039/ug=Mm.3109/len=1404/NOTE=replacement for probe set(s) 97403_at on MG-U74A                                                             |
| 103394_at            | 0.6763881  | 3.65E-06 | 78       | Cluster lnc1 U27680:Mus musculus ion channel homolog RIC mRNA, complete cds (cds=(48,584)/gb=U27680/ig=1872490/ug=Mm.1870/len=797                                                                                      |
| 103365_s_at          | 0.6763881  | 3.65E-06 | 79       | Cluster lnc1 AW215551:up0508.x1 Mus musculus cDNA, 3 end (clone=IMAGE-2651175/clone_end=3/ig=AW215551/ig=6526227/ug=Mm.18524/len=324                                                                                   |
| 102353_at            | 0.6763881  | 3.65E-06 | 80       | Cluster lnc1 M10329:Mus musculus complement receptor 3 beta subunit MAC-1 mRNA, complete cds (cds=(0,2315)/gb=M10329/ig=198434/ug=Mm.1137/len=2459                                                                     |
| 103446_at            | 0.6763881  | 3.65E-06 | 81       | Cluster lnc1 M12312:Mus musculus intracellular calcium-binding protein (MIPBP) mRNA, complete cds (cds=(17,286)/gb=M12312/ig=198809/ug=Mm.2167/len=343                                                                 |
| 102957_at            | 0.6763881  | 3.65E-06 | 82       | Cluster lnc1 U20159:Mus musculus 76 kDa tyrosine phosphoprotein SLF-76 mRNA, complete cds (cds=(162,1763)/gb=U20159/ig=906767/ug=Mm.1781/len=2247                                                                      |
| 93261_at             | 0.6763881  | 3.65E-06 | 83       | Cluster lnc1 AJ000990:Mus musculus mRNA for legumain (cds=(94,1401)/gb=AJ000990/ig=3676226/ug=Mm.17185/len=1889                                                                                                        |
| 100059_at            | 0.6763881  | 3.65E-06 | 84       | Cluster lnc1 M13175:Mus musculus cytochrome beta-558 mRNA, 3 end (clone=(0,574)/ig=M13175/ig=192913/ug=Mm.448/len=677                                                                                                  |
| 95142_s_at           | 0.6763881  | 3.65E-06 | 85       | Cluster lnc1 U10407:Capping protein beta 1 (cds=(18,839)/gb=U10407/ig=500748/ug=Mm.2945/len=1014                                                                                                                       |
| 101047_at            | 0.6763881  | 3.65E-06 | 86       | Cluster lnc1 AW123897:U1-M-BH2-1-aa-c-11-0-U1.s1 Mus musculus cDNA, 3 end (clone=U1-M-BH2-1-aa-c-11-0-U1/clone_end=3/ig=AW123897/ig=6099227/ug=Mm.7/len=413                                                            |
| 101898_s_at          |            |          |          |                                                                                                                                                                                                                        |

## Supplemental DATA Table 1

Weisberg et al. Adipose tissue transcripts whose expression correlate with body mass

| Affymetrix Probe Set | ttau       | p-value  | klauser | Affymetrix Transcript Description                                                                                                                                                                                                  |
|----------------------|------------|----------|---------|------------------------------------------------------------------------------------------------------------------------------------------------------------------------------------------------------------------------------------|
| 96909_at             | -0.669095  | 4.64E-06 | 96      | Cluster lnd AI849803:UI-M-AL1-aho-b-03-0-U1.s1 Mus musculus cDNA, 3 end /clone=UI-M-AL1-aho-b-03-0-U1 /clone_end=3 /gb=AI849803 /ig=5493709 /ug=Mm.3014 /len=501                                                                   |
| 93582_at             | -0.669095  | 4.64E-06 | 97      | Cluster lnd AF08580:Mus musculus CLK-1 (clk-1) mRNA, complete cds /cds=(0.653) /gb=AF08580 /ig=3415016 /ug=Mm.20634 /len=654                                                                                                       |
| 96575_at             | -0.669095  | 4.64E-06 | 98      | Cluster lnd X13135:Fatty acid synthase /cds=(0.2516) /gb=X13135 /ig=50947 /ug=Mm.3760 /len=3295                                                                                                                                    |
| 102362_f_at          | 0.6618226  | 5.87E-06 | 99      | Cluster lnd U22075:Mus musculus transcription factor IIB mRNA, complete cds /cds=(294.1328) /gb=U22075 /ig=965003 /ug=Mm.1167 /len=1786                                                                                            |
| 101055_at            | 0.6618226  | 5.87E-06 | 100     | Cluster lnd J05281:Protective protein for beta-galactosidase /cds=(213.1837) /gb=J05281 /ig=200492 /ug=Mm.7046 /len=1987                                                                                                           |
| 96278_at             | 0.6618226  | 5.87E-06 | 101     | Cluster lnd AI846553:UI-M-AN1-af-f-09-0-U1.s1 Mus musculus cDNA, 3 end /clone=UI-M-AN1-af-f-09-0-U1 /clone_end=3 /gb=AI846553 /ig=5490459 /ug=Mm.29865 /len=300                                                                    |
| 103226_at            | 0.6618226  | 5.87E-06 | 102     | Cluster lnd AWO18420:u95h03.x1 Mus musculus cDNA, 3 end /clone=IMAGE:2159861 /ig=5871950 /ug=Mm.20169 /len=519                                                                                                                     |
| 102644_at            | 0.6618226  | 5.87E-06 | 103     | Cluster lnd U13371:Mus musculus (C57BL/10 X CH2FJ) clone 1.5 novel mRNA from renin-expressing kidney tumor cell line, partial sequence /cds=UNKNOWNN /gb=U13371 /ig=967223 /ug=Mm.1314 /len=1217                                   |
| 99799_at             | 0.6618226  | 5.87E-06 | 104     | Cluster lnd X64361:Mus musculus vav mRNA /cds=(13.2550) /gb=X64361 /ig=55220 /ug=Mm.57191 /len=2551                                                                                                                                |
| 92633_at             | 0.6618226  | 5.87E-06 | 105     | Cluster lnd AJ242663:Mus musculus mRNA for cathepsin Z precursor (ctsz gene) /cds=(104.1024) /gb=AJ242663 /ig=5019547 /ug=Mm.115 /len=1291                                                                                         |
| 99461_at             | 0.6618226  | 5.87E-06 | 106     | Cluster lnd X84797:Mus musculus mRNA similar to human hematopoietic specific protein 1 /cds=(60.1520) /gb=X84797 /ig=683480 /ug=Mm.4091 /len=2003                                                                                  |
| 102806_at            | 0.6618226  | 5.87E-06 | 107     | Cluster lnd L48687:Voltage-gated, type 1, beta polypeptide /cds=(0.196) /gb=L48687 /ig=1162950 /ug=Mm.1418 /len=345                                                                                                                |
| 98310_at             | 0.6618226  | 5.87E-06 | 108     | Cluster lnd AI154017:u55811.r1 Mus musculus cDNA, 5 end /clone=IMAGE:1450078 /clone_end=5 /gb=AI154017 /ig=3682486 /ug=Mm.20266 /len=156                                                                                           |
| 161018_at            | -0.661823  | 5.87E-06 | 109     | Cluster lnd AI661500:u60812.x1 Mus musculus cDNA, 3 end /clone=IMAGE:748126 /clone_end=3 /gb=AI661500 /ig=4765173 /ug=Mm.3212 /len=347 /NOTE=replacement for probe set(s) 104688_at on MG-U74A                                     |
| 98623_g_at           | -0.661823  | 5.87E-06 | 110     | Cluster lnd X71922:Insulin-like growth factor 2 /cds=(0.236) /gb=X71922 /ig=393424 /ug=Mm.3862 /len=3301                                                                                                                           |
| 98128_at             | -0.661823  | 5.87E-06 | 111     | Cluster lnd U77128:Mus musculus mitochondrial ATP synthase coupling factor 6 mRNA, nuclear gene encoding mitochondrial protein, complete cds /cds=(7.333) /gb=U77128 /ig=1679742 /ug=Mm.353 /len=425                               |
| 103322_at            | -0.661823  | 5.87E-06 | 112     | Cluster lnd L35034:Ribose 5-phosphate isomerase A /cds=(207.917) /gb=L35034 /ig=636673 /ug=Mm.17905 /len=1763                                                                                                                      |
| 93048_at             | -0.661823  | 5.87E-06 | 113     | Cluster lnd AJ005253:Mus musculus mRNA for CspH protease /cds=(32.850) /gb=AJ005253 /ig=3559594 /ug=Mm.15243 /len=990                                                                                                              |
| 102663_at            | -0.661823  | 5.87E-06 | 114     | Cluster lnd XG2700:Mus musculus muPAR1 mRNA /cds=(11.994) /gb=XG2700 /ig=441462 /ug=Mm.1359 /len=1447                                                                                                                              |
| 103462_at            | -0.661823  | 5.87E-06 | 115     | Cluster lnd AW122239:UI-M-BH2.2-aov-f-02-0-U1.s1 Mus musculus cDNA, 3 end /clone=UI-M-BH2.2-aov-f-02-0-U1 /clone_end=3 /gb=AW122239 /ig=6097702 /ug=Mm.2173 /len=549                                                               |
| 98543_at             | -0.661823  | 5.87E-06 | 116     | Cluster lnd AJ232208:Mus musculus mRNA for cathepsin S, partial /cds=(0.139) /gb=AJ232208 /ig=1438249 /ug=Mm.3619 /len=366                                                                                                         |
| 93454_at             | -0.661823  | 5.87E-06 | 117     | Cluster lnd AF081789:Mus musculus cell surface antigen A44 (A44) mRNA, complete cds /cds=(120.2054) /gb=AF081789 /ig=3695112 /ug=Mm.681 /len=3070                                                                                  |
| 95502_at             | -0.661823  | 5.87E-06 | 118     | Cluster lnd AI840267:UI-M-AH0-act-e-08-0-U1.s1 Mus musculus cDNA, 3 end /clone=UI-M-AH0-act-e-08-0-U1 /clone_end=3 /gb=AI840267 /ig=5474480 /ug=Mm.25161 /len=358                                                                  |
| 101835_at            | -0.661823  | 5.87E-06 | 119     | Cluster lnd UI10484:Mus musculus lymphoid-restricted membrane protein (Jaw1) mRNA, complete cds /cds=(151.1770) /gb=UI10484 /ig=505683 /ug=Mm.843 /len=2023                                                                        |
| 104131_at            | -0.661823  | 5.87E-06 | 120     | Cluster lnd AI842363:UI-M-AM1-ago-a-05-0-U1.s1 Mus musculus cDNA, 3 end /clone=UI-M-AM1-ago-a-05-0-U1 /clone_end=3 /gb=AI842363 /ig=5476576 /ug=Mm.22067 /len=368                                                                  |
| 160106_at            | -0.661823  | 5.87E-06 | 121     | Cluster lnd X54111:Mus musculus mbh1 gene for Myc basic motif homolog-1 (mbh1) /cds=(231.1280) /gb=X54111 /ig=53017 /ug=Mm.18628 /len=1396 /NOTE=replacement for probe set(s) 93331_at on MG-U74A                                  |
| 94209_g_at           | -0.661823  | 5.87E-06 | 122     | Cluster lnd AW045202:UI-M-BH1-ah-b-08-0-U1.s1 Mus musculus cDNA, 3 end /clone=UI-M-BH1-ah-b-08-0-U1 /clone_end=3 /gb=AW045202 /ig=5905731 /ug=Mm.2220 /len=430                                                                     |
| 98398_s_at           | -0.661823  | 5.87E-06 | 123     | Cluster lnd U22262:Apolipoprotein B binding complex 1 /cds=(560.1249) /gb=U22262 /ig=899504 /ug=Mm.3333 /len=2265                                                                                                                  |
| 101996_at            | -0.661823  | 5.87E-06 | 124     | Cluster lnd U40930:Mus musculus oxidative stress-induced protein mRNA, complete cds /cds=(33.1361) /gb=U40930 /ig=1280523 /ug=Mm.9846 /len=2000                                                                                    |
| 95804_g_at           | -0.661823  | 5.87E-06 | 125     | Cluster lnd D85785:Brain immunoglobulin-like with tyrosine-based motifs /cds=(294.1823) /gb=D85785 /ig=2190256 /ug=Mm.87860 /len=2572                                                                                              |
| 98440_at             | -0.661823  | 5.87E-06 | 126     | Cluster lnd AI8598710:u60808.r1 Mus musculus cDNA, 5 end /clone=IMAGE:1002639 /clone_end=5 /gb=AI8598710 /ig=2412145 /ug=Mm.34497 /len=396                                                                                         |
| 104046_at            | -0.661823  | 5.87E-06 | 127     | Cluster lnd AI080798:u64406.r1 Mus musculus cDNA, 5 end /clone=IMAGE:1380562 /clone_end=5 /gb=AI080798 /ig=3336221 /ug=Mm.28788 /len=445                                                                                           |
| 95131_f_at           | -0.661823  | 5.87E-06 | 128     | Cluster lnd AI82592:UI-M-BH0-aid-b-11-0-U1.s1 Mus musculus cDNA, 3 end /clone=UI-M-BH0-aid-b-11-0-U1 /clone_end=3 /gb=AI82592 /ig=5496498 /ug=Mm.29415 /len=392                                                                    |
| 99184_at             | -0.661823  | 5.87E-06 | 129     | Cluster lnd AW120896:UI-M-BH2.3-aob-b-10-0-U1.s1 Mus musculus cDNA, 3 end /clone=UI-M-BH2.3-aob-b-10-0-U1 /clone_end=3 /gb=AW120896 /ig=6096229 /ug=Mm.41853 /len=302                                                              |
| 98905_at             | -0.661823  | 5.87E-06 | 130     | Cluster lnd M58633:Cell division cycle 2-like 1 /cds=(479.1783) /gb=M58633 /ig=202027 /ug=Mm.87864 /len=1936                                                                                                                       |
| 96346_at             | -0.661823  | 5.87E-06 | 131     | Cluster lnd AI845020:UI-M-BH0-ahm-b-01-0-U1.s1 Mus musculus cDNA, 3 end /clone=UI-M-BH0-ahm-b-01-0-U1 /clone_end=3 /gb=AI845020 /ig=5497926 /ug=Mm.29996 /len=262                                                                  |
| 99618_at             | -0.661823  | 5.87E-06 | 132     | Cluster lnd AI83523:UI-M-BH0-ajd-e-03-0-U1.s1 Mus musculus cDNA, 3 end /clone=UI-M-BH0-ajd-e-03-0-U1 /clone_end=3 /gb=AI83523 /ig=5407429 /ug=Mm.41362 /len=425                                                                    |
| 104150_at            | -0.6620958 | 8.03E-06 | 133     | Cluster lnd AW121957:UI-M-BH2.3-aoh-h-06-0-U1.s1 Mus musculus cDNA, 3 end /clone=UI-M-BH2.3-aoh-h-06-0-U1 /clone_end=3 /gb=AW121957 /ig=6097308 /ug=Mm.22189 /len=274                                                              |
| 101398_at            | -0.6620958 | 8.03E-06 | 134     | Cluster lnd U19520:Syntaxin binding protein 2 /cds=(22.8003) /gb=U19520 /ig=642025 /ug=Mm.7247 /len=1827                                                                                                                           |
| 93194_at             | -0.647277  | 9.37E-06 | 135     | Cluster lnd M84412:Lymphocyte antigen 9 /cds=(14.1903) /gb=M84412 /ig=198631 /ug=Mm.560 /len=2445                                                                                                                                  |
| 103835_f_at          | -0.647277  | 9.37E-06 | 136     | Cluster lnd AF081952:Mus musculus neural vesicle-like protein 3 (NVLP3) mRNA, complete cds /cds=(260.841) /gb=AF081952 /ig=3000802 /ug=Mm.20037 /len=1565                                                                          |
| 104524_at            | -0.647277  | 9.37E-06 | 137     | Cluster lnd AI848225:UI-M-AP1-ajh-h-07-0-U1.s1 Mus musculus cDNA, 3 end /clone=UI-M-AP1-ajh-h-07-0-U1 /clone_end=3 /gb=AI848225 /ig=5477038 /ug=Mm.22986 /len=341                                                                  |
| 98435_at             | -0.647277  | 9.37E-06 | 138     | Cluster lnd M74495:Mouse adenylosuccinate synthetase RNA, complete cds /cds=(30.1403) /gb=M74495 /ig=404750 /ug=Mm.3440 /len=1736                                                                                                  |
| 160697_at            | -0.647277  | 9.37E-06 | 139     | Cluster lnd U103207:Mus musculus Etna-VASP like protein (Evl) mRNA, complete cds /cds=(252.1433) /gb=U103207 /ig=1644442 /ug=Mm.2144 /len=1791 /NOTE=replacement for probe set(s) 103915_at on MG-U74A                             |
| 101155_at            | -0.647277  | 9.37E-06 | 140     | Cluster lnd D28690:Mouse mRNA for mCDO49 protein /cds=(94.6) /gb=D28690 /ig=949403 /ug=Mm.5048 /len=2649                                                                                                                           |
| 92553_at             | -0.647277  | 9.37E-06 | 141     | Cluster lnd AB025408:Mus musculus mRNA for sld478p, complete cds /cds=(74.922) /gb=AB025408 /ig=5931564 /ug=Mm.1017 /len=1056                                                                                                      |
| 99330_at             | -0.647277  | 9.37E-06 | 142     | Cluster lnd M85078:Mus musculus granulocyte-macrophage colony stimulating factor receptor low-affinity subunit mRNA, complete cds /cds=(21.1187) /gb=M85078 /ig=192594 /ug=Mm.5229 /len=1781                                       |
| 93842_at             | -0.647277  | 9.37E-06 | 143     | Cluster lnd AI196645:u33007.y1 Mus musculus cDNA, 5 end /clone=IMAGE:1886125 /clone_end=5 /gb=AI196645 /ig=3749251 /ug=Mm.21622 /len=1009                                                                                          |
| 98951_at             | -0.647277  | 9.37E-06 | 144     | Cluster lnd AF061272:Mus musculus C-type lectin (Mcl) mRNA, complete cds /cds=(160.819) /gb=AF061272 /ig=1459800 /ug=Mm.24920 /len=918                                                                                             |
| 102884_at            | -0.647277  | 9.37E-06 | 145     | Cluster lnd M117192:Homeo box A7 /cds=(100.789) /gb=M117192 /ig=147189 /len=899                                                                                                                                                    |
| 94908_r_at           | -0.647277  | 9.37E-06 | 146     | Cluster lnd AW045632:UI-M-BH1-ah-b-06-0-U1.s1 Mus musculus cDNA, 3 end /clone=UI-M-BH1-ah-b-06-0-U1 /clone_end=3 /gb=AW045632 /ig=5906161 /ug=Mm.24091 /len=248                                                                    |
| 96208_at             | -0.647277  | 9.37E-06 | 147     | Cluster lnd AW123514:UI-M-BH2.1-ah-b-04-0-U1.s1 Mus musculus cDNA, 3 end /clone=UI-M-BH2.1-ah-b-04-0-U1 /clone_end=3 /gb=AW123514 /ig=6099044 /ug=Mm.28846 /len=374                                                                |
| 96887_at             | -0.647277  | 9.37E-06 | 148     | Cluster lnd Y08702:Mus musculus mRNA for neuronal protein 15.6 /cds=(51.452) /gb=Y08702 /ig=1771305 /ug=Mm.30084 /len=554                                                                                                          |
| 96237_f_at           | -0.647277  | 9.37E-06 | 149     | Cluster lnd AI835847:UI-M-AH0-aid-b-07-0-U1.s1 Mus musculus cDNA, 3 end /clone=UI-M-AH0-aid-b-07-0-U1 /clone_end=3 /gb=AI835847 /ig=5470060 /ug=Mm.29897 /len=333                                                                  |
| 92587_at             | -0.647277  | 9.37E-06 | 150     | Cluster lnd AI118905:u15604.r1 Mus musculus cDNA, 5 end /clone=IMAGE:1398079 /clone_end=5 /gb=AI118905 /ig=3519229 /ug=Mm.28800 /len=311                                                                                           |
| 100112_at            | -0.647277  | 9.37E-06 | 151     | Cluster lnd L29123:Mus musculus adrenodoxin mRNA, complete cds /cds=(88.654) /gb=L29123 /ig=457297 /ug=Mm.1061 /len=883                                                                                                            |
| 100632_at            | -0.647277  | 9.37E-06 | 152     | Cluster lnd L12030:Stromal cell derived factor 1 /cds=(76.357) /gb=L12030 /ig=393181 /ug=Mm.465 /len=3127                                                                                                                          |
| 100294_at            | -0.647277  | 9.37E-06 | 153     | Cluster lnd U28656:Euarkyotic translation initiation factor 4E binding protein 1 /cds=(50.403) /gb=U28656 /ig=881557 /ug=Mm.6700 /len=793                                                                                          |
| 94939_at             | -0.64481   | 1.01E-05 | 154     | Cluster lnd X97227:Mus musculus mRNA for cell surface glycoprotein CD53 /cds=(0.659) /gb=X97227 /ig=1279545 /ug=Mm.2692 /len=660                                                                                                   |
| 103939_at            | -0.64481   | 1.01E-05 | 155     | Cluster lnd AW121399:UI-M-BH2.2-aom-h-02-0-U1.s1 Mus musculus cDNA, 3 end /clone=UI-M-BH2.2-aom-h-02-0-U1 /clone_end=3 /gb=AW121399 /ig=6096732 /ug=Mm.25250 /len=550                                                              |
| 95358_at             | -0.6400042 | 1.18E-05 | 156     | Cluster lnd AI843864:UI-M-AK1-aeu-c-11-0-U1.s1 Mus musculus cDNA, 3 end /clone=UI-M-AK1-aeu-c-11-0-U1 /clone_end=3 /gb=AI843864 /ig=5478077 /ug=Mm.21518 /len=341                                                                  |
| 95152_g_at           | -0.6400042 | 1.18E-05 | 157     | Cluster lnd AW061307:UI-M-BH1-aw-f-02-0-U1.s1 Mus musculus cDNA, 3 end /clone=UI-M-BH1-aw-f-02-0-U1 /clone_end=3 /gb=AW061307 /ig=6009058 /ug=Mm.29475 /len=438                                                                    |
| 102094_at            | -0.6400042 | 1.18E-05 | 158     | Cluster lnd L28095:Mouse interleukin 1-beta converting enzyme, complete cds /cds=(46.1254) /gb=L28095 /ig=452112 /ug=Mm.1051 /len=1360                                                                                             |
| 93906_s_at           | -0.6400042 | 1.18E-05 | 159     | Cluster lnd AB021966:Mus musculus mRNA for adhesion protein RA175C, complete cds /cds=(0.920) /gb=AB021966 /ig=6622554 /ug=Mm.20021 /len=921                                                                                       |
| 94294_at             | -0.6400042 | 1.18E-05 | 160     | Cluster lnd X66032:Mus musculus mRNA for cyclin B2 /cds=(101.1297) /gb=X66032 /ig=50612 /ug=Mm.25892 /len=1528                                                                                                                     |
| 160629_at            | -0.6400042 | 1.18E-05 | 161     | Cluster lnd AI847399:UI-M-A1-af-f-03-0-U1.s1 Mus musculus cDNA, 3 end /clone=UI-M-A1-af-f-03-0-U1 /clone_end=3 /gb=AI847399 /ig=5491305 /ug=Mm.18635 /len=429 /NOTE=replacement for probe set(s) 103382_at, 103383_g_at on MG-U74A |
| 93586_at             | -0.6400042 | 1.18E-05 | 162     | Cluster lnd U103207:Mus musculus mRNA for synaptotagm 2 /cds=(4.678) /gb=U103207 /ig=2959869 /ug=Mm.2079 /len=1512                                                                                                                 |
| 100587_f_at          | -0.640004  | 1.18E-05 | 163     | Cluster lnd AI843959:UI-M-AP1-ajh-h-01-0-U1.s1 Mus musculus cDNA, 3 end /clone=UI-M-AP1-ajh-h-01-0-U1 /clone_end=3 /gb=AI843959 /ig=5478172 /ug=Mm.622 /len=379                                                                    |
| 98984_f_at           | -0.640004  | 1.18E-05 | 164     | Cluster lnd D50430:Mouse mRNA for glycerol-3-phosphate dehydrogenase, complete cds /cds=(96.2279) /gb=D50430 /ig=1339637 /ug=Mm.3711 /len=2410                                                                                     |
| 161122_f_at          | -0.640004  | 1.18E-05 | 165     | Cluster lnd AV032952:AV032952 Mus musculus cDNA /clone=3 /gb=AV032952 /ig=4832500 /ug=Mm.45671 /len=144 /NOTE=replacement for probe set(s) 98757_r_at on MG-U74A, 139974_f_at on MG-U74C                                           |
| 96286_at             | -0.640004  | 1.18E-05 | 166     | Cluster lnd AI840979:UI-M-AK0-ak-e-11-0-U1.s1 Mus musculus cDNA, 3 end /clone=UI-M-AK0-ak-e-11-0-U1 /clone_end=3 /gb=AI840979 /ig=5475192 /ug=Mm.29845 /len=405                                                                    |
| 104034_at            | -0.640004  | 1.18E-05 | 167     | Cluster lnd AI846872:UI-M-AN1-af-f-02-0-U1.s1 Mus musculus cDNA, 3 end /clone=UI-M-AN1-af-f-02-0-U1 /clone_end=3 /gb=AI846872 /ig=5490578 /ug=Mm.27054 /len=427                                                                    |
| 96822_at             | -0.640004  | 1.18E-05 | 168     | Cluster lnd X56702:Mus musculus mRNA for interferon-induced 15-kDa protein /cds=(111.593) /gb=X56702 /ig=52737 /ug=Mm.4950 /len=728                                                                                                |
| 96134_at             | -0.640004  | 1.18E-05 | 169     | Cluster lnd AA75260:vp92b12.r1 Mus musculus cDNA, 5 end /clone=IMAGE:1092191 /clone_end=5 /gb=AA75260 /ig=2802458 /ug=Mm.28147 /len=205                                                                                            |
| 93131_at             | -0.637528  | 1.27E-05 | 170     | Cluster lnd D38557:Galactosylceramidase /cds=(126.2132) /gb=D38557 /ig=809504 /ug=Mm.5120 /len=2278                                                                                                                                |
| 103005_s_at          | -0.637528  | 1.27E-05 | 171     | Cluster lnd X66084:CD44 antigen /cds=(0.1976) /gb=X66084 /ig=33679 /ug=Mm.15643 /len=1997                                                                                                                                          |
| 1032715_at           | -0.637515  | 1.48E-05 | 172     | Cluster lnd U119860:Growth arrest specific 7 /cds=(10.1395) /gb=U119860 /ig=154621 /ug=Mm.146257 /len=2888                                                                                                                         |
| 103070_at            | -0.637315  | 1.48E-05 | 173     | Cluster lnd AB018194:Mus musculus mRNA for BIT, complete cds /cds=(10.1539) /gb=AB018194 /ig=4586951 /ug=Mm.1682 /len=1560                                                                                                         |
| 161819_f_at          | -0.637315  | 1.48E-05 | 174     | Cluster lnd AV356071:AV356071 Mus musculus cDNA, 3 end /clone=IMAGE:330423002 /clone_end=3 /gb=AV356071 /ig=6397128 /ug=Mm.74593 /len=248 /NOTE=replacement for probe set(s) 98234_f_at on MG-U74A                                 |
| 92780_at             | -0.637315  | 1.48E-05 | 175     | Cluster lnd U42471:Mus musculus Wiscott-Aldrich Syndrome protein homolog (N-3AP1) mRNA, complete cds /cds=(24.1586) /gb=U42471 /ig=1150833 /ug=Mm.4735 /len=2069                                                                   |
| 101876_at            | -0.637315  | 1.48E-05 | 176     | Cluster lnd X4170:CD72 antigen /cds=(36.1190) /gb=X4170 /ig=91194 /len=8620 /len=140                                                                                                                                               |
| 101017_f_at          | -0.637315  | 1.48E-05 | 177     | Cluster lnd J41701962:v85h08.r1 Mus musculus cDNA, 5 end /clone=IMAGE:11521001 /clone_end=5 /gb=J41701962 /ig=6096927 /ug=Mm.29844 /len=336                                                                                        |
| 100128_at            | -0.637315  | 1.48E-05 | 178     | Cluster lnd M38724:Cell division cycle control protein 2a /cds=(24.917) /gb=M38724 /ig=192533 /ug=Mm.4761 /len=963                                                                                                                 |
| 963715_at            | -0.637315  | 1.48E-05 | 179     | Cluster lnd M65270:Mouse cathepsin B gene /cds=(25.1044) /gb=M65270 /ig=309151 /ug=Mm.22753 /len=1848                                                                                                                              |
| 94831_at             | -0.637315  | 1.48E-05 | 180     | Cluster lnd Y13361:RAB7, member RAS oncogene family, pseudogene 1 /cds=(0.623) /gb=Y13361 /ig=218154 /ug=Mm.87807 /len=624                                                                                                         |
| 104940_at            | -0.632112  | 1.48E-05 | 181     | Cluster lnd AW123316:UI-M-BH2.1-ah-b-01-0-U1.s1 Mus musculus cDNA, 3 end /clone=UI-M-BH2.1-ah-b-01-0-U1 /clone_end=3 /gb=AW123316 /ig=6098846 /ug=Mm.26925 /len=4                                                                  |

Supplemental DATA Table 1

Weisberg et al. Adipose tissue transcripts whose expression correlate with body mass

| Affymetrix Probe Set | ktau       | p-value  | klauder | Affymetrix Transcript Description                                                                                                                                                                                              |
|----------------------|------------|----------|---------|--------------------------------------------------------------------------------------------------------------------------------------------------------------------------------------------------------------------------------|
| 161006_at            | -0.625459  | 1.85E-05 | 191     | Cluster lncd AW123037.U1-M-BH2.1-apv-g-07-0-U1.s1 Mus musculus cDNA, 3 end /clone=U1-M-BH2.1-apv-g-07-0-U1 /clone_end=3 /gb=AW123037 /gi=6098567 /lug=Mm.2917 /len=474 /NOTE=replacement for probe set(s) 104426_at on MG-U74A |
| 100972_s_at          | -0.625459  | 1.85E-05 | 192     | Cluster lncd AW124975.U1-M-BH2.1-apv-c-08-0-U1.s1 Mus musculus cDNA, 3 end /clone=U1-M-BH2.1-apv-c-08-0-U1 /clone_end=3 /gb=AW124975 /gi=6100505 /lug=Mm.6660 /len=304                                                         |
| 102871_at            | -0.625459  | 1.85E-05 | 193     | Cluster lncd S69507.U2 small nuclear ribonucleoprotein auxiliary factor (UZ2F), 35 kDa, related sequence / cds=(1157,2443) /gb=S69507 /gi=5466060 /lug=Mm.14286 /len=2831                                                      |
| 161900_f_at          | -0.625459  | 1.85E-05 | 194     | Cluster lncd AW173835.U1-M-BH2.1-apv-g-04-0-U1.s1 Mus musculus cDNA, 3 end /clone=U1-M-BH2.1-apv-g-04-0-U1 /clone_end=3 /gb=AW173835 /gi=6421482 /lug=Mm.92504 /len=226 /NOTE=replacement for probe set(s) 98689_at on MG-U74A |
| 98980_at             | 0.622919   | 2.00E-05 | 195     | Cluster lncd U18372.CD37 antigen /cds=(0,845) /gb=U18372 /gi=1668815 /lug=Mm.3688 /len=646                                                                                                                                     |
| 96046_at             | 0.618189   | 2.32E-05 | 196     | Cluster lncd X53928.M.musculus mRNA for PGI (biglycan) /cds=(234,1343) /gb=X53928 /gi=53666 /lug=Mm.2608 /len=1964                                                                                                             |
| 103218_at            | 0.618189   | 2.32E-05 | 197     | Cluster lncd J04761.Mouse housekeeping DXS253E (P3) and DXS254E (GDx) genes, 3 end, and complete cds /cds=(0,549) /gb=J04761 /gi=202256 /lug=Mm.19931 /len=550                                                                 |
| 101932_at            | 0.618189   | 2.32E-05 | 198     | Cluster lncd D83484.Mouse mRNA for protein tyrosine phosphatase epsilon, complete cds /cds=(60,2759) /gb=D83484 /gi=119932 /lug=Mm.945 /len=2827                                                                               |
| 96336_at             | 0.618189   | 2.32E-05 | 200     | Cluster lncd AW84628.U1-M-A1.1-ah-e-04-0-U1.s1 Mus musculus cDNA, 3 end /clone=U1-M-A1.1-ah-e-04-0-U1 /clone_end=3 /gb=AW84628 /gi=5488832 /lug=Mm.29975 /len=568                                                              |
| 94504_at             | 0.618189   | 2.32E-05 | 200     | Cluster lncd AW83865.U1-M-A00-acf-a-08-0-U1.s1 Mus musculus cDNA, 3 end /clone=U1-M-A00-acf-a-08-0-U1 /clone_end=3 /gb=AW83865 /gi=5472868 /lug=Mm.28955 /len=343                                                              |
| 93769_at             | 0.618189   | 2.32E-05 | 201     | Cluster lncd AW838708.U1-M-A00-acf-a-02-0-U1.s1 Mus musculus cDNA, 3 end /clone=U1-M-A00-acf-a-02-0-U1 /clone_end=3 /gb=AW838708 /gi=5472921 /lug=Mm.21187 /len=263                                                            |
| 98001_at             | 0.618189   | 2.32E-05 | 202     | Cluster lncd U58203.Mus musculus Lsc (lnc) oncogene mRNA, complete cds /cds=(91,2850) /gb=U58203 /gi=1389755 /lug=Mm.3181 /len=3200                                                                                            |
| 100539_at            | 0.618189   | 2.32E-05 | 203     | Cluster lncd AW814279.U1-M-A00-adj-a-08-0-U1.s1 Mus musculus cDNA, 3 end /clone=U1-M-A00-adj-a-08-0-U1 /clone_end=3 /gb=AW814279 /gi=5475492 /lug=Mm.5293 /len=439                                                             |
| 90578_at             | 0.618189   | 2.32E-05 | 204     | Cluster lncd U01915.Topoisomerase (DNA) II alpha /cds=(0,829) /gb=U01915 /gi=404643 /lug=Mm.4237 /len=1331                                                                                                                     |
| 100949_at            | 0.618189   | 2.32E-05 | 205     | Cluster lncd AW461767.U1-M-A00-adj-a-08-0-U1.s1 Mus musculus cDNA, 3 end /clone=IMAGE-1383906 /clone_end=3 /gb=AW461767 /gi=4315797 /lug=Mm.6419 /len=394                                                                      |
| 96333_s_at           | 0.618189   | 2.32E-05 | 206     | Cluster lncd AW259199.unm91a03.y1 Mus musculus cDNA, 5 end /clone=IMAGE-2332108 /clone_end=5 /gb=AW259199 /gi=8632180 /lug=Mm.29971 /len=411                                                                                   |
| 92762_at             | 0.618189   | 2.32E-05 | 207     | Cluster lncd AJ133533.Mus musculus mRNA for dendritic cell immunoreceptor /cds=(278,894) /gb=AJ133533 /gi=6019623 /lug=Mm.47384 /len=1418                                                                                      |
| 160107_at            | 0.618189   | 2.32E-05 | 208     | Cluster lncd K01515.Hypoxanthine guanine phosphoribosyl transferase /cds=(0,656) /gb=K01515 /gi=103905 /lug=Mm.18076 /len=657 /NOTE=replacement for probe set(s) 93335_at on MG-U74A                                           |
| 97424_at             | 0.618189   | 2.32E-05 | 209     | Cluster lncd AW049647.U1-M-BH1-and-g-07-0-U1.s1 Mus musculus cDNA, 3 end /clone=U1-M-BH1-and-g-07-0-U1 /clone_end=3 /gb=AW049647 /gi=5910176 /lug=Mm.30009 /len=487                                                            |
| 160204_at            | -0.618186  | 2.32E-05 | 210     | Cluster lncd AW838470.U1-M-AJ0-aba-g-08-0-U1.s1 Mus musculus cDNA, 3 end /clone=U1-M-AJ0-aba-g-08-0-U1 /clone_end=3 /gb=AW838470 /gi=5472883 /lug=Mm.25170 /len=432 /NOTE=replacement for probe set(s) 95504_at on MG-U74A     |
| 103098_at            | -0.618186  | 2.32E-05 | 211     | Cluster lncd Y00208.Hemox box A5 /cds=(74,886) /gb=Y00208 /gi=51371 /lug=Mm.173 /len=1678                                                                                                                                      |
| 96293_at             | -0.618186  | 2.32E-05 | 212     | Cluster lncd AW81603.U1-M-BH0-ain-a-07-0-U1.s1 Mus musculus cDNA, 3 end /clone=U1-M-BH0-ain-a-07-0-U1 /clone_end=3 /gb=AW81603 /gi=5495509 /lug=Mm.29867 /len=415                                                              |
| 93371_at             | -0.618186  | 2.32E-05 | 213     | Cluster lncd U80654.Mus musculus basophil mRNA, complete cds /cds=(43,2928) /gb=U80654 /gi=2408218 /lug=Mm.6110 /len=4441                                                                                                      |
| 101058_at            | -0.618186  | 2.32E-05 | 214     | Cluster lncd J00356.mouse alpha-amylase-1 mrna without leader /cds=(48,1583) /gb=J00356 /gi=191906 /lug=Mm.7074 /len=1615                                                                                                      |
| 93485_at             | -0.618186  | 2.32E-05 | 215     | Cluster lncd AW844911.U1-M-BG0-ahv-d-10-0-U1.s1 Mus musculus cDNA, 3 end /clone=U1-M-BG0-ahv-d-10-0-U1 /clone_end=3 /gb=AW844911 /gi=5488817 /lug=Mm.7172 /len=399                                                             |
| 97874_at             | -0.618186  | 2.32E-05 | 216     | Cluster lncd AW83863.U1-M-BH0-ajh-f-07-0-U1.s1 Mus musculus cDNA, 3 end /clone=U1-M-BH0-ajh-f-07-0-U1 /clone_end=3 /gb=AW83863 /gi=5497789 /lug=Mm.28349 /len=440                                                              |
| 94367_at             | -0.618186  | 2.32E-05 | 217     | Cluster lncd AW83862.U1-M-BG1-ajc-b-06-0-U1.s1 Mus musculus cDNA, 3 end /clone=U1-M-BG1-ajc-b-06-0-U1 /clone_end=3 /gb=AW83862 /gi=5494268 /lug=Mm.25309 /len=494                                                              |
| 93562_at             | -0.618186  | 2.32E-05 | 218     | Cluster lncd AW83466.U1-M-BG1-ajc-c-10-0-U1.s1 Mus musculus cDNA, 3 end /clone=U1-M-BG1-ajc-c-10-0-U1 /clone_end=3 /gb=AW83466 /gi=5498272 /lug=Mm.2033 /len=410                                                               |
| 98833_at             | 0.6109131  | 2.89E-05 | 219     | Cluster lncd X66402.Matrix metalloproteinase 3 /cds=(24,1457) /gb=X66402 /gi=296167 /lug=Mm.4993 /len=1740                                                                                                                     |
| 97538_at             | 0.6109131  | 2.89E-05 | 220     | Cluster lncd M19279.Beta-glucuronidase structural /cds=(12,1958) /gb=M19279 /gi=193524 /lug=Mm.3317 /len=2454                                                                                                                  |
| 103707_at            | 0.6109131  | 2.89E-05 | 221     | Cluster lncd U77461.Complement component 3a receptor 1 /cds=(0,1433) /gb=U77461 /gi=2130534 /lug=Mm.4949 /len=1434                                                                                                             |
| 92596_at             | 0.6109131  | 2.89E-05 | 222     | Cluster lncd AW843029.U1-M-AK1-aee-aj-08-0-U1.s1 Mus musculus cDNA, 3 end /clone=U1-M-AK1-aee-aj-08-0-U1 /clone_end=3 /gb=AW843029 /gi=5477242 /lug=Mm.10727 /len=298                                                          |
| 99157_at             | 0.6109131  | 2.89E-05 | 223     | Cluster lncd AW846684.U1-M-AN1-af-e-05-0-U1.s1 Mus musculus cDNA, 3 end /clone=U1-M-AN1-af-e-05-0-U1 /clone_end=3 /gb=AW846684 /gi=5490590 /lug=Mm.41629 /len=333                                                              |
| 100300_at            | 0.6109131  | 2.89E-05 | 224     | Cluster lncd U43384.Cytochrome b-245, beta polypeptide /cds=(0,1712) /gb=U43384 /gi=1209751 /lug=Mm.86600 /len=1714                                                                                                            |
| 99662_at             | 0.6109131  | 2.89E-05 | 225     | Cluster lncd U87240.Mannosidase 2, alpha B1 /cds=(58,3036) /gb=U87240 /gi=1914442 /lug=Mm.4219 /len=3119                                                                                                                       |
| 96086_at             | 0.6109131  | 2.89E-05 | 226     | Cluster lncd X13333.CD14 antigen /cds=(2,132) /gb=X13333 /gi=60330 /lug=Mm.3490 /len=1366                                                                                                                                      |
| 93019_at             | 0.6109131  | 2.89E-05 | 227     | Cluster lncd Z35401.M.musculus C3H gene for histone H2A.X /cds=(0,431) /gb=Z35401 /gi=515878 /lug=Mm.14767 /len=432                                                                                                            |
| 99434_at             | 0.6109131  | 2.89E-05 | 228     | Cluster lncd AF001036.Mus musculus CD83 antigen mRNA, complete cds /cds=(0,590) /gb=AF001036 /gi=3452106 /lug=Mm.5175 /len=591                                                                                                 |
| 101016_at            | 0.6109131  | 2.89E-05 | 229     | Cluster lncd DF8798.Mus musculus mRNA for ARF1, complete cds /cds=(78,623) /gb=DF8798 /gi=1566206 /lug=Mm.6836 /len=1032                                                                                                       |
| 98446_s_at           | 0.6109131  | 2.89E-05 | 230     | Cluster lncd U06354.Mus musculus Bcl-2-related receptor protein tyrosine kinase mRNA, complete cds /cds=(102,3065) /gb=U06354 /gi=4591772 /lug=Mm.34533 /len=3733                                                              |
| 94441_at             | 0.6109131  | 2.89E-05 | 231     | Cluster lncd AW81237.U1-M-BH1-amy-c-02-0-U1.s2 Mus musculus cDNA, 3 end /clone=U1-M-BH1-amy-c-02-0-U1 /clone_end=3 /gb=AW81237 /gi=6039898 /lug=Mm.26584 /len=431                                                              |
| 98937_at             | 0.6109131  | 2.89E-05 | 232     | Cluster lncd AW049795.U1-M-BH1-ann-f-07-0-U1.s1 Mus musculus cDNA, 3 end /clone=U1-M-BH1-ann-f-07-0-U1 /clone_end=3 /gb=AW049795 /gi=5910324 /lug=Mm.28889 /len=521                                                            |
| 99176_at             | 0.6109131  | 2.89E-05 | 233     | Cluster lncd AW843393.U1-M-AQ1-adz-g-04-0-U1.s1 Mus musculus cDNA, 3 end /clone=U1-M-AQ1-adz-g-04-0-U1 /clone_end=3 /gb=AW843393 /gi=5477606 /lug=Mm.41785 /len=394                                                            |
| 102334_at            | 0.6109131  | 2.89E-05 | 234     | Cluster lncd AF059583.Mus musculus docking protein Dok-R mRNA, complete cds /cds=(49,1281) /gb=AF059583 /gi=3088598 /lug=Mm.10761 /len=1715                                                                                    |
| 96174_at             | -0.6109131 | 2.89E-05 | 235     | Cluster lncd AW125692.U1-M-BH2.2-ajg-f-01-0-U1.s1 Mus musculus cDNA, 3 end /clone=U1-M-BH2.2-ajg-f-01-0-U1 /clone_end=3 /gb=AW125692 /gi=6010122 /lug=Mm.28309 /len=384                                                        |
| 161860_f_at          | -0.6109131 | 2.89E-05 | 236     | Cluster lncd AV06208.AV06208 Mus musculus cDNA /clone=201000312 /clone_end=3 /gb=AV06208 /gi=5182436 /lug=Mm.75370 /len=276 /NOTE=replacement for probe set(s) 98645_f_at on MG-U74A                                           |
| 93467_at             | -0.6109131 | 2.89E-05 | 237     | Cluster lncd AW852734.U1-M-BH0-ajh-h-02-0-U1.s1 Mus musculus cDNA, 3 end /clone=U1-M-BH0-ajh-h-02-0-U1 /clone_end=3 /gb=AW852734 /gi=5496640 /lug=Mm.6926 /len=348                                                             |
| 92747_at             | -0.6109131 | 2.89E-05 | 238     | Cluster lncd AW124594.U1-M-BH2.1-apt-g-02-0-U1.s1 Mus musculus cDNA, 3 end /clone=U1-M-BH2.1-apt-g-02-0-U1 /clone_end=3 /gb=AW124594 /gi=6100124 /lug=Mm.30718 /len=407                                                        |
| 97424_at             | -0.6109131 | 2.89E-05 | 239     | Cluster lncd AW843895.U1-M-AK1-aee-aj-09-0-U1.s1 Mus musculus cDNA, 3 end /clone=U1-M-AK1-aee-aj-09-0-U1 /clone_end=3 /gb=AW843895 /gi=5478108 /lug=Mm.17253 /len=470                                                          |
| 160223_at            | -0.6109131 | 2.89E-05 | 240     | Cluster lncd AW047439.U1-M-BH1-ame-a-04-0-U1.s1 Mus musculus cDNA, 3 end /clone=U1-M-BH1-ame-a-04-0-U1 /clone_end=3 /gb=AW047439 /gi=5910329 /lug=Mm.27570 /len=379 /NOTE=replacement for probe set(s) 96702_f_at on MG-U74A   |
| 102022_at            | -0.6109131 | 2.89E-05 | 241     | Cluster lncd AW124555.U1-M-BH2.1-apt-b-05-0-U1.s1 Mus musculus cDNA, 3 end /clone=U1-M-BH2.1-apt-b-05-0-U1 /clone_end=3 /gb=AW124555 /gi=6100085 /lug=Mm.10093 /len=547                                                        |
| 99594_at             | -0.6109131 | 2.89E-05 | 242     | Cluster lncd AW84598.U1-M-AJ1-ahh-c-08-0-U1.s2 Mus musculus cDNA, 3 end /clone=U1-M-AJ1-ahh-c-08-0-U1 /clone_end=3 /gb=AW84598 /gi=5488509 /lug=Mm.42826 /len=329                                                              |
| 93550_at             | -0.6109131 | 2.89E-05 | 243     | Cluster lncd DB8752.Mouse mRNA for double LIM protein-1, complete cds /cds=(6,587) /gb=DB8752 /gi=1695701 /lug=Mm.2020 /len=822                                                                                                |
| 93871_at             | 0.6036404  | 3.59E-05 | 244     | Cluster lncd L32838.Mouse perlecan interstitial 1 receptor antagonist protein (L1) mRNA, complete cds /cds=(0,536) /gb=L32838 /gi=48784 /lug=Mm.882 /len=537                                                                   |
| 104155_f_at          | 0.6036404  | 3.59E-05 | 245     | Cluster lncd U19118.Mus musculus transcription factor LRG-21 mRNA, complete cds /cds=(167,712) /gb=U19118 /gi=6833751 /lug=Mm.2706 /len=1597                                                                                   |
| 103248_at            | 0.6036404  | 3.59E-05 | 246     | Cluster lncd AF060872.Mus musculus FK506-binding protein 12.6 mRNA, complete cds /cds=(104,430) /gb=AF060872 /gi=3777532 /lug=Mm.20453 /len=944                                                                                |
| 93483_at             | 0.6036404  | 3.59E-05 | 247     | Cluster lncd J03023.Hemopoietic cell kinase /cds=(177,1688) /gb=J03023 /gi=192212 /lug=Mm.715 /len=2002                                                                                                                        |
| 98808_s_at           | 0.6036404  | 3.59E-05 | 248     | Cluster lncd D84376.Mus musculus mRNA for Phosphatidic acid phosphatase, complete cds /cds=(286,1137) /gb=D84376 /gi=1487872 /lug=Mm.35836 /len=1212                                                                           |
| 100594_at            | 0.6036404  | 3.59E-05 | 249     | Cluster lncd U72941.Mus musculus annexin IV mRNA, complete cds /cds=(60,1049) /gb=U72941 /gi=177832 /lug=Mm.619 /len=1061                                                                                                      |
| 96283_at             | 0.6036404  | 3.59E-05 | 250     | Cluster lncd AW849180.U1-M-AJ1-agy-f-10-0-U1.s1 Mus musculus cDNA, 3 end /clone=U1-M-AJ1-agy-f-10-0-U1 /clone_end=3 /gb=AW849180 /gi=5493086 /lug=Mm.29870 /len=397                                                            |
| 103488_at            | 0.6036404  | 3.59E-05 | 251     | Cluster lncd X91144.Selectin (p-selectin) ligand /cds=(7,1200) /gb=X91144 /gi=1332541 /lug=Mm.22173 /len=1661                                                                                                                  |
| 161969_f_at          | 0.6036404  | 3.59E-05 | 252     | Cluster lncd AV225548.AV225548 Mus musculus cDNA, 3 end /clone=3830430K21 /clone_end=3 /gb=AV225548 /gi=6176863 /lug=Mm.77180 /len=237 /NOTE=replacement for probe set(s) 99215_f_at on MG-U74A                                |
| 92918_at             | 0.6036404  | 3.59E-05 | 253     | Cluster lncd AW06979.Mus musculus coagulation factor VII gene, complete cds /cds=(101,1350) /gb=AW06979 /gi=1513221 /lug=Mm.4827 /len=1843                                                                                     |
| 96066_s_at           | 0.6036404  | 3.59E-05 | 254     | Cluster lncd X97047.Pyruvate kinase 3 /cds=(6,1601) /gb=X97047 /gi=1405932 /lug=Mm.2635 /len=2134                                                                                                                              |
| 100611_at            | 0.6036404  | 3.59E-05 | 255     | Cluster lncd M21050.Mouse lysozyme M gene /cds=(30,476) /gb=M21050 /gi=198960 /lug=Mm.654 /len=1264                                                                                                                            |
| 93835_at             | 0.6036404  | 3.59E-05 | 256     | Cluster lncd AW843222.U1-M-AK1-aee-g-05-0-U1.s1 Mus musculus cDNA, 3 end /clone=U1-M-AK1-aee-g-05-0-U1 /clone_end=3 /gb=AW843222 /gi=5477435 /lug=Mm.21580 /len=373                                                            |
| 98609_at             | 0.6036404  | 3.59E-05 | 257     | Cluster lncd AJ250723.Mus musculus mRNA for septin-like protein Smt1 (Smt1) gene /cds=(177,1181) /gb=AJ250723 /gi=6165418 /lug=Mm.38450 /len=2942                                                                              |
| 103366_at            | 0.6036404  | 3.59E-05 | 258     | Cluster lncd AW117236.una801.1 Mus musculus cDNA, 5 end /clone=IMAGE-395217 /clone_end=5 /gb=AW117236 /gi=3517660 /lug=Mm.18524 /len=298                                                                                       |
| 99158_at             | 0.6036404  | 3.59E-05 | 259     | Cluster lncd U58888.Mus musculus SH3-containing protein SHP2 mRNA, partial cds /cds=(0,755) /gb=U58888 /gi=1407662 /lug=Mm.4165 /len=1041                                                                                      |
| 101963_at            | 0.6036404  | 3.59E-05 | 260     | Cluster lncd X06086.Cathepsin L /cds=(68,1072) /gb=X06086 /gi=53046 /lug=Mm.930 /len=1374                                                                                                                                      |
| 100962_at            | 0.6036404  | 3.59E-05 | 261     | Cluster lncd U47543.Ngfi-A binding protein 2 /cds=(220,1797) /gb=U47543 /gi=1197730 /lug=Mm.6549 /len=2539                                                                                                                     |
| 103275_at            | 0.6036404  | 3.59E-05 | 262     | Cluster lncd U13836.Mus musculus vascular adenosine triphosphatase subunit A16 mRNA, complete cds /cds=(18,2537) /gb=U13836 /gi=3955095 /lug=Mm.20869 /len=2557                                                                |
| 100069_at            | -0.60364   | 3.59E-05 | 263     | Cluster lncd M77497.Cytochrome P450, 2D /cds=(81,1536) /gb=M77497 /gi=1920297 /lug=Mm.4515 /len=1810                                                                                                                           |
| 92800_l_at           | -0.60364   | 3.59E-05 | 264     | Cluster lncd AW836694.U1-M-AJ0-aax-a-08-0-U1.s1 Mus musculus cDNA, 3 end /clone=U1-M-AJ0-aax-a-08-0-U1 /clone_end=3 /gb=AW836694 /gi=5470907 /lug=Mm.12677 /len=344                                                            |
| 93826_at             | -0.60364   | 3.59E-05 | 265     | Cluster lncd AW196230.un73a07.y1 Mus musculus cDNA, 5 end /clone=IMAGE-2136180 /clone_end=5 /gb=AW196230 /gi=5748967 /lug=Mm.21544 /len=513                                                                                    |
| 96588_at             | -0.60364   | 3.59E-05 | 266     | Cluster lncd U10204.Prostaglandin E receptor EP5 subtype /cds=(118,1215) /gb=U10204 /gi=220571 /lug=Mm.30424 /len=2091                                                                                                         |
| 93094_at             | -0.60364   | 3.59E-05 | 267     | Cluster lncd AWK212131.un2926.x1 Mus musculus cDNA, 3 end /clone=IMAGE-264600 /clone_end=3 /gb=AWK212131 /gi=6518137 /lug=Mm.21754 /len=566                                                                                    |
| 160256_at            | -0.60364   | 3.59E-05 | 268     | Cluster lncd AW85190.U1-M-BH0-ajh-d-04-0-U1.s1 Mus musculus cDNA, 3 end /clone=U1-M-BH0-ajh-d-04-0-U1 /clone_end=3 /gb=AW85190 /gi=5497096 /lug=Mm.27964 /len=346 /NOTE=replacement for probe set(s) 97280_at on MG-U74A       |
| 99541_at             | 0.6010939  | 3.87E-05 | 269     | Cluster lncd AJ223293.Mus musculus mRNA for kinesin-related mitotic motor protein /cds=(0,3044) /gb=AJ223293 /gi=4160555 /lug=Mm.42203 /len=4412                                                                               |
| 103923_at            | 0.5963676  | 4.45E-05 | 270     | Cluster lncd AA656014.vrs47g02.z1 Mus musculus cDNA, 5 end /clone=IMAGE-1149458 /clone_end=5 /gb=AA656014 /gi=2592168 /lug=Mm.25075 /len=195                                                                                   |
| 99300_at             | 0.5963676  | 4.45E-05 | 271     | Cluster lncd M28697.interleukin 7 receptor /cds=(47,1426) /gb=M28697 /gi=148677 /lug=Mm.389 /len=248                                                                                                                           |
| 93093_at             | 0.5963676  | 4.45E-05 | 272     | Cluster lncd U35623.Myeloid cell leukemia sequence 1 /cds=(48,1043) /gb=U35623 /gi=522268 /lug=Mm.1639 /len=3396                                                                                                               |
| 103876_at            | 0.5963676  | 4.45E-05 | 273     | Cluster lncd AA760339.vv75c06.r1 Mus musculus cDNA, 5 end /clone=IMAGE-1228234 /clone_end=5 /gb=AA760339 /gi=2808133 /lug=Mm.21181 /len=552                                                                                    |
| 96405_at             | 0.5963676  | 4.       |         |                                                                                                                                                                                                                                |



## Supplemental DATA Table 1

Weisberg et al. Adipose tissue transcripts whose expression correlate with body mass

| Affymetrix Probe Set | ktau      | p-value  | klaunder | Affymetrix Transcript Description                                                                                                                                                                                              |
|----------------------|-----------|----------|----------|--------------------------------------------------------------------------------------------------------------------------------------------------------------------------------------------------------------------------------|
| 92220_s_at           | 0.574593  | 8.38E-05 | 381      | Cluster lnd U60884:Mus musculus SH3P9 mRNA, complete cds (cds=(178,1482)) (gb=U60884) (gi=1438562) (ug=Mm.34445) (len=1531)                                                                                                    |
| 161247_f_at          | 0.574549  | 8.38E-05 | 382      | Cluster lnd AV133342:AV133342 Mus musculus cDNA, 3 end (clone=58304090:16_c1one_end=3) (gb=AV133342) (gi=6278594) (ug=Mm.56559) (len=247) (NOTE:replacement for probe set(s) 101260_f_at on MG-U74A)                           |
| 160269_at            | 0.574549  | 8.38E-05 | 383      | Cluster lnd U40494:Mus musculus augmentor of liver regeneration (Alr) gene, complete cds (cds=(252,629)) (gb=U40494) (gi=4096809) (ug=Mm.28124) (len=1165) (NOTE:replacement for probe set(s) 97801_at on MG-U74A)             |
| 160076_at            | 0.574549  | 8.38E-05 | 384      | Cluster lnd AF096988:Mus musculus ribonase 1 (R1) mRNA, complete cds (cds=(108,108)) (gb=AF096988) (gi=350969) (ug=Mm.1301) (len=108) (NOTE:replacement for probe set(s) 92822_at on MG-U74A)                                  |
| 97201_s_at           | 0.574549  | 8.38E-05 | 385      | Cluster lnd AA282331:vp390t1.r1 Mus musculus cDNA, 5 end (clone=IMAGE:107916) (clone_end=5) (gb=AA282331) (gi=2893249) (ug=Mm.27677) (len=339)                                                                                 |
| 96959_at             | 0.574549  | 8.38E-05 | 386      | Cluster lnd AI852355:U1-M-BHO-aj-c-05-0-U1.s1 Mus musculus cDNA, 3 end (clone=U1-M-BHO-aj-c-05-0-U1) (clone_end=3) (gb=AI852355) (gi=5496261) (ug=Mm.42805) (len=413)                                                          |
| 96989_at             | 0.574549  | 8.38E-05 | 387      | Cluster lnd AW123802:U1-M-BH2-1-1-1-0-U1.s1 Mus musculus cDNA, 3 end (clone=U1-M-BH2-1-1-1-0-U1) (clone_end=3) (gb=AW123802) (gi=6099332) (ug=Mm.30113) (len=371)                                                              |
| 92987_at             | 0.574549  | 8.38E-05 | 388      | Cluster lnd M28383:Sculte carrier family 4 (anion exchanger), member 3 (cds=(186,389)) (gb=M28383) (gi=1917135) (ug=Mm.5053) (len=406)                                                                                         |
| 103622_at            | 0.574549  | 8.38E-05 | 389      | Cluster lnd AW05255:U1-M-BH1-ans-b1-1-0-U1.s1 Mus musculus cDNA, 3 end (clone=U1-M-BH1-ans-b1-1-0-U1) (clone_end=3) (gb=AW05255) (gi=5910784) (ug=Mm.20260) (len=397)                                                          |
| 97719_at             | 0.574549  | 8.38E-05 | 390      | Cluster lnd X74736:Receptor protein tyrosine kinase, c-met-related (cds=(256,4392)) (gb=X74736) (gi=515880) (ug=Mm.3901) (len=4720)                                                                                            |
| 103001_at            | 0.574549  | 8.38E-05 | 391      | Cluster lnd U43836:Mus musculus VEGF-related factor mvr186 precursor mRNA, complete cds (cds=(192,815)) (gb=U43836) (gi=1703480) (ug=Mm.15607) (len=1236)                                                                      |
| 97164_at             | 0.57195   | 9.02E-05 | 392      | Cluster lnd C77566:C77566 Mus musculus cDNA, 3 end (clone=J0033309) (clone_end=3) (gb=C77566) (gi=2617896) (ug=Mm.35516) (len=616)                                                                                             |
| 161922_at            | 0.569343  | 9.71E-05 | 393      | Cluster lnd AV178993:AV178993 Mus musculus cDNA, 3 end (clone=923001013) (clone_end=3) (gb=AV178993) (gi=5426002) (ug=Mm.91237) (len=250) (NOTE:replacement for probe set(s) 96237_at on MG-U74A)                              |
| 160502_at            | 0.5672765 | 1.03E-04 | 394      | Cluster lnd AF084524:Mus musculus cellular repressor of E1A-stimulated genes CREG mRNA, complete cds (cds=(6,667)) (gb=AF084524) (gi=3550344) (ug=Mm.459) (len=875) (NOTE:replacement for probe set(s) 100900_at on MG-U74A)   |
| 92472_f_at           | 0.5672765 | 1.03E-04 | 395      | Cluster lnd AF099973:Mus musculus schlafen2 (Sln2) mRNA, complete cds (cds=(182,1318)) (gb=AF099973) (gi=3983149) (ug=Mm.41214) (len=1684)                                                                                     |
| 97327_at             | 0.5672765 | 1.03E-04 | 396      | Cluster lnd L26320:Flap structure specific endonuclease 1 (cds=(103,1239)) (gb=L26320) (gi=499648) (ug=Mm.2952) (len=2033)                                                                                                     |
| 92513_at             | 0.5672765 | 1.03E-04 | 397      | Cluster lnd AJ026336:Mus musculus mRNA for nuclear protein SA2 (cds=(279,3767)) (gb=AJ026336) (gi=2644956) (ug=Mm.42238) (len=3971)                                                                                            |
| 102641_at            | 0.5672765 | 1.03E-04 | 398      | Cluster lnd L03215:SFV proviral integration 1 (cds=UNKNOWN) (gb=L03215) (gi=2010035) (ug=Mm.1302) (len=1232)                                                                                                                   |
| 102319_at            | 0.5672765 | 1.03E-04 | 399      | Cluster lnd AF062484:Mus musculus SDF8 mRNA, complete cds (cds=(64,561)) (gb=AF062484) (gi=3126980) (ug=Mm.10704) (len=617)                                                                                                    |
| 92849_at             | 0.5672765 | 1.03E-04 | 400      | Cluster lnd M58004:Small inducible cytokine A6 (cds=(49,399)) (gb=M58004) (gi=192243) (ug=Mm.137) (len=1333)                                                                                                                   |
| 96992_at             | 0.5672765 | 1.03E-04 | 401      | Cluster lnd U77093:Leucine arylaminopeptidase 1, intestinal (cds=(33,2933)) (gb=U77093) (gi=1674500) (ug=Mm.4487) (len=3367)                                                                                                   |
| 104284_at            | 0.5672765 | 1.03E-04 | 402      | Cluster lnd AI846126:U1-M-AK1-ajf-b-04-0-U1.s2 Mus musculus cDNA, 3 end (clone=U1-M-AK1-ajf-b-04-0-U1) (clone_end=3) (gb=AI846126) (gi=5490032) (ug=Mm.22258) (len=458)                                                        |
| 92476_at             | 0.5672765 | 1.03E-04 | 403      | Cluster lnd L06443:Growth differentiation factor 3 (cds=(121,1221)) (gb=L06443) (gi=293346) (ug=Mm.4213) (len=1280)                                                                                                            |
| 93734_s_at           | 0.5672765 | 1.03E-04 | 404      | Cluster lnd D49686:Mus musculus mRNA for Tat binding protein-1, complete cds (cds=(176,1504)) (gb=D49686) (gi=3510276) (ug=Mm.20946) (len=1569)                                                                                |
| 96752_at             | 0.5672765 | 1.03E-04 | 405      | Cluster lnd M06051:Interleukin adhesion molecule (cds=(75,186)) (gb=M06051) (gi=459870) (ug=Mm.28973) (len=2540)                                                                                                               |
| 101105_at            | 0.5672765 | 1.03E-04 | 406      | Cluster lnd AB025349:Mus musculus L2BF1BFAF mRNA for LAF2 binding protein 1, complete cds (cds=(7,320)) (gb=AB025349) (gi=5708070) (ug=Mm.7508) (len=603)                                                                      |
| 95298_at             | 0.5672765 | 1.03E-04 | 407      | Cluster lnd AI189811:miR790t1 Mus musculus cDNA, 5 end (clone=IMAGE:637396) (clone_end=5) (gb=AI189811) (gi=1778416) (ug=Mm.1862) (len=365)                                                                                    |
| 98035_g_at           | 0.5672765 | 1.03E-04 | 408      | Cluster lnd U38330:Histocompatibility 2, class II, locus Mb 1 (cds=(0,785)) (gb=U38330) (gi=1209550) (ug=Mm.3322) (len=786)                                                                                                    |
| 98355_at             | 0.567277  | 1.03E-04 | 409      | Cluster lnd AA544993:vk42e09.r1 Mus musculus cDNA, 5 end (clone=IMAGE:949288) (clone_end=5) (gb=AA544993) (gi=2306067) (ug=Mm.4303) (len=297)                                                                                  |
| 96018_f_at           | 0.567277  | 1.03E-04 | 410      | Cluster lnd AI835961:U1-M-BHO-ajd-h-09-0-U1.s1 Mus musculus cDNA, 3 end (clone=U1-M-BHO-ajd-h-09-0-U1) (clone_end=3) (gb=AI835961) (gi=5497467) (ug=Mm.25634) (len=480)                                                        |
| 96236_at             | 0.567277  | 1.03E-04 | 411      | Cluster lnd AW122965:U1-M-BH2-1-1-0-U1.s2 Mus musculus cDNA, 3 end (clone=U1-M-BH2-1-1-0-U1) (clone_end=3) (gb=AW122965) (gi=6058695) (ug=Mm.28798) (len=620)                                                                  |
| 100550_f_at          | 0.567277  | 1.03E-04 | 412      | Cluster lnd AW060422:U1-M-BH1-ajq-c-07-0-U1.s1 Mus musculus cDNA, 3 end (clone=U1-M-BH1-ajq-c-07-0-U1) (clone_end=3) (gb=AW060422) (gi=3008173) (ug=Mm.548) (len=373)                                                          |
| 97367_at             | 0.567277  | 1.03E-04 | 413      | Cluster lnd U95146:Mus musculus AKAP121 mRNA, complete cds (cds=(197,2770)) (gb=U95146) (gi=2072306) (ug=Mm.2969) (len=2858)                                                                                                   |
| 100122_at            | 0.567277  | 1.03E-04 | 414      | Cluster lnd L34290:Mus musculus guanine nucleotide regulatory protein mRNA, complete cds (cds=(30,1091)) (gb=L34290) (gi=1237255) (ug=Mm.4702) (len=1803)                                                                      |
| 161753_f_at          | 0.567277  | 1.03E-04 | 415      | Cluster lnd AV290060:AV290060 Mus musculus cDNA, 3 end (clone=5131400E08) (clone_end=3) (gb=AV290060) (gi=6304091) (ug=Mm.73642) (len=219) (NOTE:replacement for probe set(s) 98159_f_at on MG-U74A)                           |
| 97329_at             | 0.567277  | 1.03E-04 | 416      | Cluster lnd AW124061:U1-M-BH2-1-1-0-U1.s1 Mus musculus cDNA, 3 end (clone=U1-M-BH2-1-1-0-U1) (clone_end=3) (gb=AW124061) (gi=6099991) (ug=Mm.29529) (len=437)                                                                  |
| 96927_at             | 0.567277  | 1.03E-04 | 417      | Cluster lnd AF019660:RAR-related orphan receptor gamma (cds=(0,1550)) (gb=AF019660) (gi=2674082) (ug=Mm.4372) (len=1551)                                                                                                       |
| 101158_at            | 0.567277  | 1.03E-04 | 418      | Cluster lnd Y00850:Zinc finger protein 2 (cds=(432,1475)) (gb=Y00850) (gi=52810) (ug=Mm.4958) (len=2615)                                                                                                                       |
| 97531_at             | 0.567277  | 1.03E-04 | 419      | Cluster lnd X95280:Mus musculus mRNA for GOS2-like protein (cds=(132,443)) (gb=X95280) (gi=1213012) (ug=Mm.3283) (len=752)                                                                                                     |
| 96132_at             | 0.567277  | 1.03E-04 | 420      | Cluster lnd AB023957:Mus musculus EIG 180 mRNA for ethanol induced gene product, complete cds (cds=(140,481)) (gb=AB023957) (gi=6468203) (ug=Mm.28143) (len=728)                                                               |
| 93946_at             | 0.5664684 | 1.11E-04 | 421      | Cluster lnd AF013960:Mus musculus regulator of G-protein signaling 7 (RGS7) mRNA, complete cds (cds=(178,1585)) (gb=AF013960) (gi=37372) (len=2893)                                                                            |
| 160694_at            | 0.5660037 | 1.26E-04 | 422      | Cluster lnd U69599:Interferon gamma receptor 2 (cds=(0,998)) (gb=U69599) (gi=1710143) (ug=Mm.22698) (len=999) (NOTE:replacement for probe set(s) 104384_at on MG-U74A)                                                         |
| 101502_at            | 0.5660037 | 1.26E-04 | 423      | Cluster lnd X89749:M.musculus mRNA for mTGF protein (cds=(279,1097)) (gb=X89749) (gi=1495713) (ug=Mm.8155) (len=1186)                                                                                                          |
| 97380_at             | 0.5660037 | 1.26E-04 | 424      | Cluster lnd AI841689:U1-M-A00-ajc-h-11-0-U1.s1 Mus musculus cDNA, 3 end (clone=U1-M-A00-ajc-h-11-0-U1) (clone_end=3) (gb=AI841689) (gi=5475902) (ug=Mm.29658) (len=337)                                                        |
| 92031_at             | 0.5660037 | 1.26E-04 | 425      | Cluster lnd AW016589:Mus musculus IKK-1 mRNA for inducible kappaB kinase, complete cds (cds=(34,213)) (gb=AW016589) (gi=6011213) (ug=Mm.3732) (len=2893)                                                                       |
| 95631_at             | 0.5660037 | 1.26E-04 | 426      | Cluster lnd AF088911:Mus musculus protein phosphatase X (Pxx) mRNA, complete cds (cds=(139,1062)) (gb=AF088911) (gi=4028334) (ug=Mm.28082) (len=1276)                                                                          |
| 99467_at             | 0.5660037 | 1.26E-04 | 427      | Cluster lnd AI846922:U1-M-AK1-ajey-d-05-0-U1.s1 Mus musculus cDNA, 3 end (clone=U1-M-AK1-ajey-d-05-0-U1) (clone_end=3) (gb=AI846922) (gi=5490828) (ug=Mm.41224) (len=381)                                                      |
| 160767_at            | 0.5660037 | 1.26E-04 | 428      | Cluster lnd L42293:Steryl O-acyltransferase 1 (cds=(809,2431)) (gb=L42293) (gi=10668609) (ug=Mm.28099) (len=3697) (NOTE:replacement for probe set(s) 95638_at on MG-U74A)                                                      |
| 160979_at            | 0.5660037 | 1.26E-04 | 429      | Cluster lnd AA590345:vn56c04.r1 Mus musculus cDNA, 5 end (clone=IMAGE:1025382) (clone_end=5) (gb=AA590345) (gi=2403725) (ug=Mm.24491) (len=468) (NOTE:replacement for probe set(s) 103749_at on MG-U74A)                       |
| 104042_f_at          | 0.5660037 | 1.26E-04 | 430      | Cluster lnd AI842275:U1-M-AH1-ajf-d-12-0-U1.s1 Mus musculus cDNA, 3 end (clone=U1-M-AH1-ajf-d-12-0-U1) (clone_end=3) (gb=AI842275) (gi=5475628) (ug=Mm.21470) (len=412)                                                        |
| 160636_at            | 0.5660037 | 1.26E-04 | 431      | Cluster lnd AI854251:U1-M-BHO-aj-s-05-0-U1.s1 Mus musculus cDNA, 3 end (clone=U1-M-BHO-aj-s-05-0-U1) (clone_end=3) (gb=AI854251) (gi=5498157) (ug=Mm.18965) (len=556) (NOTE:replacement for probe set(s) 103426_at on MG-U74A) |
| 103352_at            | 0.5660037 | 1.26E-04 | 432      | Cluster lnd X55603:Dolichyl-phosphate alpha-N-acetylglucosaminylphosphotransferase 2 (cds=(59,1291)) (gb=X55603) (gi=51077) (ug=Mm.18353) (len=1764)                                                                           |
| 102196_at            | 0.5660037 | 1.26E-04 | 433      | Cluster lnd AF042487:Mus musculus intermediate conductance potassium channel mK1 mRNA, complete cds (cds=(40,1317)) (gb=AF042487) (gi=3421064) (ug=Mm.9911) (len=1469)                                                         |
| 96885_at             | 0.5660037 | 1.26E-04 | 434      | Cluster lnd AI839814:U1-M-A00-aj-c-07-0-U1.s1 Mus musculus cDNA, 3 end (clone=U1-M-A00-aj-c-07-0-U1) (clone_end=3) (gb=AI839814) (gi=60473992) (ug=Mm.30085) (len=342)                                                         |
| 96852_at             | 0.5660037 | 1.26E-04 | 435      | Cluster lnd X58861:Component component 1, q subcomponent, alpha polypeptide (cds=(20,766)) (gb=X58861) (gi=60226) (ug=Mm.370) (len=1033)                                                                                       |
| 102661_f_at          | 0.5660037 | 1.26E-04 | 436      | Cluster lnd M24377:Early growth response 2 (cds=(0,1262)) (gb=M24377) (gi=198599) (ug=Mm.1353) (len=1263)                                                                                                                      |
| 160836_at            | 0.5660037 | 1.26E-04 | 437      | Cluster lnd U69535:Mus musculus semaphorin M-sema G mRNA, complete cds (cds=(60,2645)) (gb=U69535) (gi=1750256) (ug=Mm.33903) (len=2769) (NOTE:replacement for probe set(s) 98411_at on MG-U74A)                               |
| 101587_at            | 0.5660037 | 1.26E-04 | 438      | Cluster lnd U89491:Mus musculus microsomal epoxide hydrolase (Eph1) mRNA, allele b, complete cds (cds=(43,1410)) (gb=U89491) (gi=1890659) (ug=Mm.9075) (len=1451)                                                              |
| 95137_at             | 0.5660037 | 1.26E-04 | 439      | Cluster lnd AI852985:U1-M-BHO-aj-a-04-0-U1.s1 Mus musculus cDNA, 3 end (clone=U1-M-BHO-aj-a-04-0-U1) (clone_end=3) (gb=AI852985) (gi=5496891) (ug=Mm.29431) (len=428)                                                          |
| 97341_at             | 0.5660037 | 1.26E-04 | 440      | Cluster lnd AW124082:U1-M-BH2-1-1-0-U1.s1 Mus musculus cDNA, 3 end (clone=U1-M-BH2-1-1-0-U1) (clone_end=3) (gb=AW124082) (gi=6099612) (ug=Mm.29596) (len=430)                                                                  |
| 104124_at            | 0.5660037 | 1.26E-04 | 441      | Cluster lnd AW123135:U1-M-BH2-1-1-0-U1.s1 Mus musculus cDNA, 3 end (clone=U1-M-BH2-1-1-0-U1) (clone_end=3) (gb=AW123135) (gi=6098865) (ug=Mm.22028) (len=503)                                                                  |
| 93809_at             | 0.5660037 | 1.26E-04 | 442      | Cluster lnd U41736:Ancient ubiquitous protein (cds=(60,1292)) (gb=U41736) (gi=1517821) (ug=Mm.2146) (len=1499)                                                                                                                 |
| 104275_s_at          | 0.5660037 | 1.26E-04 | 443      | Cluster lnd AB021961:Mus musculus mutant p53 mRNA, complete cds (cds=(100,1272)) (gb=AB021961) (gi=5421849) (ug=Mm.222) (len=1429)                                                                                             |
| 93900_at             | 0.5660037 | 1.26E-04 | 444      | Cluster lnd M23362:Fibroblast growth factor receptor 2 (cds=(0,1037)) (gb=M23362) (gi=533219) (ug=Mm.16340) (len=1038)                                                                                                         |
| 98460_at             | 0.5660037 | 1.26E-04 | 445      | Cluster lnd AJ237917:Mus musculus mRNA for falso protein (cds=(37,1545)) (gb=AJ237917) (gi=6102999) (ug=Mm.34778) (len=3554)                                                                                                   |
| 95058_f_at           | 0.5660037 | 1.26E-04 | 446      | Cluster lnd AW121984:U1-M-BH2-3-aj-b-10-0-U1.s1 Mus musculus cDNA, 3 end (clone=U1-M-BH2-3-aj-b-10-0-U1) (clone_end=3) (gb=AW121984) (gi=6097345) (ug=Mm.29153) (len=380)                                                      |
| 161205_at            | 0.5660037 | 1.26E-04 | 447      | Cluster lnd AV260484:AV260484 Mus musculus cDNA, 3 end (clone=IMAGE:1323) (clone_end=3) (gb=AV260484) (gi=6247943) (ug=Mm.56672) (len=319) (NOTE:replacement for probe set(s) 100854_f_at, 100855_f_at on MG-U74A)             |
| 94418_at             | 0.5660037 | 1.26E-04 | 448      | Cluster lnd AI839004:U1-M-A00-aj-c-04-0-U1.s1 Mus musculus cDNA, 3 end (clone=U1-M-A00-aj-c-04-0-U1) (clone_end=3) (gb=AI839004) (gi=60473721) (ug=Mm.29171) (len=428)                                                         |
| 98901_at             | 0.5660037 | 1.26E-04 | 449      | Cluster lnd AW047870:U1-M-BH1-als-4-10-0-U1.s1 Mus musculus cDNA, 3 end (clone=U1-M-BH1-als-4-10-0-U1) (clone_end=3) (gb=AW047870) (gi=5908399) (ug=Mm.28576) (len=353)                                                        |
| 161519_f_at          | 0.5660037 | 1.26E-04 | 450      | Cluster lnd AV210958:AV210958 Mus musculus cDNA, 3 end (clone=IMAGE:17001272) (clone_end=3) (gb=AV210958) (gi=6151416) (ug=Mm.65546) (len=285) (NOTE:replacement for probe set(s) 95840_f_at on MG-U74A)                       |
| 96975_at             | 0.5660037 | 1.26E-04 | 451      | Cluster lnd AA879937:vv02b10.r1 Mus musculus cDNA, 5 end (clone=IMAGE:1230715) (clone_end=5) (gb=AA879937) (gi=2989820) (ug=Mm.4428) (len=331)                                                                                 |
| 162248_f_at          | 0.5660037 | 1.26E-04 | 452      | Cluster lnd AV234517:AV234517 Mus musculus cDNA, 3 end (clone=IMAGE:6330559) (clone_end=3) (gb=AV234517) (gi=6013745) (ug=Mm.99125) (len=229) (NOTE:replacement for probe set(s) 100256_f_at on MG-U74A)                       |
| 102192_f_at          | 0.5660037 | 1.26E-04 | 453      | Cluster lnd AF068246:Mus musculus SA protein mRNA, complete cds (cds=(274,2010)) (gb=AF068246) (gi=3328675) (ug=Mm.9821) (len=2544)                                                                                            |
| 96613_at             | 0.5660037 | 1.26E-04 | 454      | Cluster lnd X51941:Methylmalonyl coenzyme A mutase (cds=(46,2292)) (gb=X51941) (gi=53150) (ug=Mm.4299) (len=3246)                                                                                                              |
| 100952_at            | 0.5660037 | 1.26E-04 | 455      | Cluster lnd U47323:Stromal interaction molecule 1 (cds=(193,2250)) (gb=U47323) (gi=1493832) (ug=Mm.645) (len=3192)                                                                                                             |
| 162466_at            | 0.5660037 | 1.26E-04 | 456      | Cluster lnd AV063221:AV063221 Mus musculus cDNA (clone=201000500) (clone_end=3) (gb=AV063221) (gi=5183049) (ug=Mm.52945) (len=176) (NOTE:replacement for probe set(s) 103153_at on MG-U74A)                                    |
| 161338_at            | 0.5660037 | 1.26E-04 | 457      | Cluster lnd AV124842:AV124842 Mus musculus cDNA (clone=230000000) (clone_end=3) (gb=AV124842) (gi=6110190) (ug=Mm.55547) (len=204) (NOTE:replacement for probe set(s) 94501_at on MG-U74A)                                     |
| 94454_at             | 0.5527309 | 1.54E-04 | 458      | Cluster lnd AF068348:Mus musculus proline-rich protein (Bpp) mRNA, complete cds (cds=(15,521)) (gb=AF068348) (gi=3549610) (ug=Mm.28797) (len=1779)                                                                             |
| 96075_at             | 0.5527309 | 1.54E-04 | 459      | Cluster lnd AW060876:U1-M-BH1-ajm-g-07-0-U1.s1 Mus musculus cDNA, 3 end (clone=U1-M-BH1-ajm-g-07-0-U1) (clone_end=3) (gb=AW060876) (gi=6008627) (ug=Mm.2654) (len=472)                                                         |
| 93798_at             | 0.5527309 | 1.54E-04 | 460      | Cluster lnd AI839988:U1-M-AH0-aj-s-11-0-U1.s1 Mus musculus cDNA, 3 end (clone=U1-M-AH0-aj-s-11-0-U1) (clone_end=3) (gb=AI839988) (gi=5474201) (ug=Mm.2140) (len=352)                                                           |
| 104289_at            | 0.5527309 | 1.54E-04 | 461      | Cluster lnd AI844721:U1-M-AH1-ajf-y-05-0-U1.s1 Mus musculus cDNA, 3 end (clone=U1-M-AH1-ajf-y-05-0-U1) (clone_end=3) (gb=AI844721) (gi=5475685) (                                                                              |

## Supplemental DATA Table 1

Weisberg et al. Adipose tissue transcripts whose expression correlate with body mass

| Affymetrix Probe Set | ttau       | p-value  | klauser | Affymetrix Transcript Description                                                                                                                                                                                                                                |
|----------------------|------------|----------|---------|------------------------------------------------------------------------------------------------------------------------------------------------------------------------------------------------------------------------------------------------------------------|
| 93913_at             | -0.552731  | 1.54E-04 | 476     | Cluster lnc AI043090.uc86e07.x1 Mus musculus cDNA, 3 end /clone=IMAGE-1432548 /clone_end=3 /gb=AI043090 /gi=3286350 /ug=Mm.89587 /len=507                                                                                                                        |
| 94375_at             | -0.552731  | 1.54E-04 | 477     | Cluster lnc Y11666.Mus musculus gene encoding hexokinase II, exon 1 (and joined CDS) /cnds=(479,3232) /gb=Y11666 /gi=1907082 /ug=Mm.2549 /len=5496                                                                                                               |
| 97180_f_at           | -0.552731  | 1.54E-04 | 478     | Cluster lnc V00728.Mouse germ line gene coding for beta-globin (Y2) /cnds=(0,443) /gb=V00728 /gi=50176 /ug=Mm.35830 /len=444                                                                                                                                     |
| 93304_f_at           | -0.552731  | 1.54E-04 | 479     | Cluster lnc U27315.Adrenine nucleotide translocator 1, skeletal muscle /cnds=(96,362) /gb=U27315 /gi=602007 /ug=Mm.6220 /len=273                                                                                                                                 |
| 94178_at             | -0.552731  | 1.54E-04 | 480     | Cluster lnc AB010919.Mus musculus mRNA for membrane cofactor protein, complete cds /cnds=(20,117) /gb=AB010919 /gi=3978552 /ug=Mm.12884 /len=1156                                                                                                                |
| 103534_at            | -0.552731  | 1.54E-04 | 481     | Cluster lnc V00722.Mouse gene for beta-1-globin /cnds=(63,496) /gb=V00722 /gi=501155 /ug=Mm.2329 /len=626                                                                                                                                                        |
| 104362_f_at          | -0.552731  | 1.54E-04 | 482     | Cluster lnc AI835332.Ul-M-BHO-ajd-f-02-0-Ul.s1 Mus musculus cDNA, 3 end /clone=UI-M-BHO-ajd-f-02-0-Ul /clone_end=3 /gb=AI835332 /gi=5497438 /ug=Mm.22599 /len=353                                                                                                |
| 94562_at             | -0.552731  | 1.54E-04 | 483     | Cluster lnc AI843968.Ul-M-AP1-ajp-1e-10-Ul.s1 Mus musculus cDNA, 3 end /clone=UI-M-AP1-ajp-1e-10-Ul /clone_end=3 /gb=AI843968 /gi=5478181 /ug=Mm.29114 /len=334                                                                                                  |
| 162286_f_at          | -0.552731  | 1.54E-04 | 484     | Cluster lnc AV374281.AV374281 Mus musculus cDNA, 3 end /clone=AI3000817 /clone_end=3 /gb=AV374281 /gi=6421928 /ug=Mm.99941 /len=246 /NOTE=replacement for probe set(s) 100658_f_at on MG-U74A                                                                    |
| 98039_at             | -0.552731  | 1.54E-04 | 485     | Cluster lnc AI838319.Ul-M-BHO-ajr-a-08-0-Ul.s1 Mus musculus cDNA, 3 end /clone=UI-M-BHO-ajr-a-08-0-Ul /clone_end=3 /gb=AI838319 /gi=5497725 /ug=Mm.34002 /len=369                                                                                                |
| 98533_at             | -0.552731  | 1.54E-04 | 486     | Cluster lnc AI854779.Ul-M-BHO-aka-d-08-0-Ul.s1 Mus musculus cDNA, 3 end /clone=UI-M-BHO-aka-d-08-0-Ul /clone_end=3 /gb=AI854779 /gi=5498885 /ug=Mm.35849 /len=428                                                                                                |
| 99128_at             | -0.552731  | 1.54E-04 | 487     | Cluster lnc AI849767.Ul-M-AL1-ahn-f-09-0-Ul.s1 Mus musculus cDNA, 3 end /clone=UI-M-AL1-ahn-f-09-0-Ul /clone_end=3 /gb=AI849767 /gi=5493673 /ug=Mm.41 /len=362                                                                                                   |
| 102394_at            | -0.550392  | 1.89E-04 | 488     | Cluster lnc U15742.inositol polyphosphate 5-phosphatase, 145 kDa /cnds=(91,363) /gb=U15742 /gi=1236990 /ug=Mm.15105 /len=483                                                                                                                                     |
| 160296_at            | -0.5454582 | 1.89E-04 | 489     | Cluster lnc AF033188.Mus musculus WSB-2 mRNA, complete cds /cnds=(121,14) /gb=AF033188 /gi=5766492 /ug=Mm.28489 /len=1215 /NOTE=replacement for probe set(s) 97913_at on MG-U74A                                                                                 |
| 100325_at            | -0.5454582 | 1.89E-04 | 490     | Cluster lnc M68027.Glycoprotein 49 A /cnds=(41,852) /gb=M68027 /gi=192796 /ug=Mm.87772 /len=1305                                                                                                                                                                 |
| 98491_at             | -0.5454582 | 1.89E-04 | 491     | Cluster lnc AI286904.u178d09.y1 Mus musculus cDNA, 5 end /clone=IMAGE-1888529 /clone_end=5 /gb=AI286904 /gi=3926657 /ug=Mm.35596 /len=352                                                                                                                        |
| 100719_at            | -0.5454582 | 1.89E-04 | 492     | Cluster lnc X56135.Mouse mRNA for prothymosin alpha /cnds=(170,505) /gb=X56135 /gi=549796 /ug=Mm.19187 /len=1191                                                                                                                                                 |
| 101327_at            | -0.5454582 | 1.89E-04 | 493     | Cluster lnc U82810.Mus musculus L-gliadin mRNA, 5' UTR and partial cds /cnds=(129,151) /gb=U82810 /gi=18113737 /ug=Mm.56880 /len=152                                                                                                                             |
| 98025_at             | -0.5454582 | 1.89E-04 | 494     | Cluster lnc M34896.Ecotropic viral integration site 2 /cnds=(191,862) /gb=M34896 /gi=193202 /ug=Mm.3266 /len=1217                                                                                                                                                |
| 94140_at             | -0.5454582 | 1.89E-04 | 495     | Cluster lnc M59446.Scavenger receptor /cnds=(1,20) /gb=M59446 /gi=192739 /ug=Mm.1227 /len=413                                                                                                                                                                    |
| 98083_at             | -0.5454582 | 1.89E-04 | 496     | Cluster lnc AW049031.Ul-M-BH1-amp-g-08-0-Ul.s1 Mus musculus cDNA, 3 end /clone=UI-M-BH1-amp-g-08-0-Ul /clone_end=3 /gb=AW049031 /gi=5909560 /ug=Mm.34576 /len=473                                                                                                |
| 94294_at             | -0.5454582 | 1.89E-04 | 497     | Cluster lnc AW122731.Ul-M-BH2-2-acc-e-08-0-Ul.s1 Mus musculus cDNA, 3 end /clone=UI-M-BH2-2-acc-e-08-0-Ul /clone_end=3 /gb=AW122731 /gi=6098261 /ug=Mm.22560 /len=204                                                                                            |
| 98587_at             | -0.5454582 | 1.89E-04 | 498     | Cluster lnc X61449.Mus musculus mRNA for clone DN38 /cnds=(0,1034) /gb=X61449 /gi=50721 /ug=Mm.3797 /len=1322                                                                                                                                                    |
| 94004_at             | -0.5454582 | 1.89E-04 | 499     | Cluster lnc Z19543.Mus musculus h2-calponin cDNA /cnds=(102,1019) /gb=Z19543 /gi=51143 /ug=Mm.21776 /len=1821                                                                                                                                                    |
| 96731_at             | -0.5454582 | 1.89E-04 | 500     | Cluster lnc AA615100.u340d4.r1 Mus musculus cDNA, 5 end /clone=IMAGE-1051807 /clone_end=5 /gb=AA615100 /gi=2502328 /ug=Mm.28869 /len=145                                                                                                                         |
| 104432_at            | -0.5454582 | 1.89E-04 | 501     | Cluster lnc AF016482.Mus musculus thoo7 (tho7) mRNA, partial cds /cnds=(0,666) /gb=AF016482 /gi=2353785 /ug=Mm.29210 /len=667                                                                                                                                    |
| 96548_at             | -0.5454582 | 1.89E-04 | 502     | Cluster lnc AW122039.Ul-M-BH2-2-acc-c-03-0-Ul.s1 Mus musculus cDNA, 3 end /clone=UI-M-BH2-2-acc-c-03-0-Ul /clone_end=3 /gb=AW122039 /gi=6097445 /ug=Mm.27317 /len=498                                                                                            |
| 100548_at            | -0.5454582 | 1.89E-04 | 503     | Cluster lnc L131958.Mus musculus (clone_pMAT1) mRNA, complete cds /cnds=(961,1146) /gb=L131958 /gi=473909 /ug=Mm.544 /len=1770                                                                                                                                   |
| 97263_s_at           | -0.5454582 | 1.89E-04 | 504     | Cluster lnc AI846289.Ul-M-AK1-aez-f-02-0-Ul.s1 Mus musculus cDNA, 3 end /clone=UI-M-AK1-aez-f-02-0-Ul /clone_end=3 /gb=AI846289 /gi=5490195 /ug=Mm.27899 /len=375                                                                                                |
| 101468_at            | -0.5454582 | 1.89E-04 | 505     | Cluster lnc X12905.Propriodrin factor, complement /cnds=(0,1313) /gb=X12905 /gi=53786 /ug=Mm.8308 /len=1358                                                                                                                                                      |
| 98513_at             | -0.5454582 | 1.89E-04 | 506     | Cluster lnc AI849676.Ul-M-AL1-ahn-f-09-0-Ul.s1 Mus musculus cDNA, 3 end /clone=UI-M-AL1-ahn-f-09-0-Ul /clone_end=3 /gb=AI849676 /gi=5493775 /ug=Mm.38521 /len=416                                                                                                |
| 90119_at             | -0.5454582 | 1.89E-04 | 507     | Cluster lnc D00472.Cofilin 1, non-muscle /cnds=(94,594) /gb=D00472 /gi=220883 /ug=Mm.4024 /len=1134                                                                                                                                                              |
| 104601_at            | -0.5454582 | 1.89E-04 | 508     | Cluster lnc X14432.Thrombomodulin /cnds=(158,1891) /gb=X14432 /gi=54781 /ug=Mm.24096 /len=3636                                                                                                                                                                   |
| 103050_at            | -0.5454582 | 1.89E-04 | 509     | Cluster lnc AF035717.Transcription factor 21 /cnds=(225,764) /gb=AF035717 /gi=2745884 /ug=Mm.16497 /len=1240                                                                                                                                                     |
| 162023_f_at          | -0.5454582 | 1.89E-04 | 510     | Cluster lnc AV364086.AV364086 Mus musculus cDNA, 3 end /clone=AI830438111 /clone_end=3 /gb=AV364086 /gi=6411733 /ug=Mm.95078 /len=245 /NOTE=replacement for probe set(s) 99279_at on MG-U74A                                                                     |
| 104086_at            | -0.5454582 | 1.89E-04 | 511     | Cluster lnc AW045654.Ul-M-BH1-ajp-1e-10-Ul.s1 Mus musculus cDNA, 3 end /clone=UI-M-BH1-ajp-1e-10-Ul /clone_end=3 /gb=AW045654 /gi=5909163 /ug=Mm.21788 /len=443                                                                                                  |
| 160581_f_at          | -0.5454582 | 1.89E-04 | 512     | Cluster lnc U15541.Cytochrome C oxidase, subunit VIII /cnds=(64,266) /gb=U15541 /gi=6094890 /ug=Mm.3841 /len=321 /NOTE=replacement for probe set(s) 99008_f_at on MG-U74A                                                                                        |
| 102124_f_at          | -0.5454582 | 1.89E-04 | 513     | Cluster lnc AI836879.Ul-M-APD-abg-d-08-0-Ul.s2 Mus musculus cDNA, 3 end /clone=UI-M-APD-abg-d-08-0-Ul /clone_end=3 /gb=AI836879 /gi=5471092 /ug=Mm.43075 /len=252                                                                                                |
| 160540_at            | -0.5454582 | 1.89E-04 | 514     | Cluster lnc AF022223.Mus musculus Bcl-2 binding protein (BAG-1) mRNA, complete cds /cnds=(33,1100) /gb=AF022223 /gi=3523108 /ug=Mm.688 /len=1284 /NOTE=replacement for probe set(s) 101032_at on MG-U74A                                                         |
| 98583_at             | -0.5454582 | 1.89E-04 | 515     | Cluster lnc X53451.Glutathione S-transferase, pi 2 /cnds=(8,640) /gb=X53451 /gi=51124 /ug=Mm.426 /len=703                                                                                                                                                        |
| 94909_at             | -0.5454582 | 1.89E-04 | 516     | Cluster lnc AW046919.Ul-M-BH1-akb-c-03-0-Ul.s1 Mus musculus cDNA, 3 end /clone=UI-M-BH1-akb-c-03-0-Ul /clone_end=3 /gb=AW046919 /gi=5907448 /ug=Mm.24104 /len=440                                                                                                |
| 93088_at             | -0.5454582 | 1.89E-04 | 517     | Cluster lnc X01838.Beta-2-microglobulin /cnds=(52,411) /gb=X01838 /gi=50104 /ug=Mm.163 /len=647                                                                                                                                                                  |
| 104767_f_at          | -0.5454582 | 1.89E-04 | 518     | Cluster lnc AW060921.Ul-M-BH1-avn-c-12-0-Ul.s1 Mus musculus cDNA, 3 end /clone=UI-M-BH1-avn-c-12-0-Ul /clone_end=3 /gb=AW060921 /gi=6008672 /ug=Mm.24875 /len=438                                                                                                |
| 160287_at            | -0.5454582 | 1.89E-04 | 519     | Cluster lnc AI82557.Ul-M-BHO-ajw-q-07-0-Ul.s1 Mus musculus cDNA, 3 end /clone=UI-M-BHO-ajw-q-07-0-Ul /clone_end=3 /gb=AI82557 /gi=5496463 /ug=Mm.28357 /len=320 /NOTE=replacement for probe set(s) 97877_at on MG-U74A                                           |
| 90190_at             | -0.5454582 | 1.89E-04 | 520     | Cluster lnc AI842924.Ul-M-AP1-ajp-1e-10-Ul.s1 Mus musculus cDNA, 3 end /clone=UI-M-AP1-ajp-1e-10-Ul /clone_end=3 /gb=AI842924 /gi=5497445 /ug=Mm.41902 /len=279                                                                                                  |
| 161184_f_at          | -0.5454582 | 1.89E-04 | 521     | Cluster lnc AV235418.AV235418 Mus musculus cDNA, 3 end /clone=AI73240405 /clone_end=3 /gb=AV235418 /gi=6187931 /ug=Mm.83328 /len=237 /NOTE=replacement for probe set(s) 100832_f_at on MG-U74A                                                                   |
| 102748_at            | -0.5454582 | 1.89E-04 | 522     | Cluster lnc U52925.Coagulation factor V /cnds=(5,6556) /gb=U52925 /gi=3219690 /ug=Mm.12900 /len=6585                                                                                                                                                             |
| 100042_at            | -0.5454582 | 1.89E-04 | 523     | Cluster lnc AI879212.Ul-M-ALO-abq-d-08-0-Ul.s1 Mus musculus cDNA, 3 end /clone=UI-M-ALO-abq-d-08-0-Ul /clone_end=3 /gb=AI879212 /gi=5472134 /ug=Mm.44240 /len=244                                                                                                |
| 95501_at             | -0.542896  | 2.02E-04 | 524     | Cluster lnc AW122770.Ul-M-BH2-2-acc-h-06-0-Ul.s2 Mus musculus cDNA, 3 end /clone=UI-M-BH2-2-acc-h-06-0-Ul /clone_end=3 /gb=AW122770 /gi=6098500 /ug=Mm.25157 /len=435                                                                                            |
| 100407_at            | -0.540148  | 2.17E-04 | 525     | Cluster lnc X57878.Mus musculus LYL1 gene (clone L6) /cnds=(465,130) /gb=X57878 /gi=52965 /ug=Mm.4025 /len=188                                                                                                                                                   |
| 97904_at             | -0.5381854 | 2.29E-04 | 526     | Cluster lnc AW123953.Ul-M-BH2-3-acc-d-06-0-Ul.s1 Mus musculus cDNA, 3 end /clone=UI-M-BH2-3-acc-d-06-0-Ul /clone_end=3 /gb=AW123953 /gi=6099483 /ug=Mm.28464 /len=362                                                                                            |
| 100427_at            | -0.5381854 | 2.29E-04 | 527     | Cluster lnc U37465.Protein tyrosine phosphatase, receptor type, O /cnds=(380,1597) /gb=U37465 /gi=1063639 /ug=Mm.4715 /len=2760                                                                                                                                  |
| 92975_at             | -0.5381854 | 2.29E-04 | 528     | Cluster lnc L14543.Mouse SH3 binding protein 3BP2 mRNA, complete cds /cnds=(56,1735) /gb=L14543 /gi=293267 /ug=Mm.5012 /len=2802                                                                                                                                 |
| 98828_at             | -0.5381854 | 2.29E-04 | 529     | Cluster lnc X07465.Mouse mRNA for cell surface glycoprotein M6 /cnds=(43,40341) /gb=X07465 /gi=52982 /ug=Mm.4967 /len=4282                                                                                                                                       |
| 101982_at            | -0.5381854 | 2.29E-04 | 530     | Cluster lnc X69875.Mus musculus VASP gene (clone H10) /cnds=(11,30) /gb=X69875 /gi=1617401 /ug=Mm.9684 /len=1131                                                                                                                                                 |
| 96834_at             | -0.5381854 | 2.29E-04 | 531     | Cluster lnc AI843586.Ul-M-AO1-aeH-f-08-0-Ul.s1 Mus musculus cDNA, 3 end /clone=UI-M-AO1-aeH-f-08-0-Ul /clone_end=3 /gb=AI843586 /gi=5477764 /ug=Mm.29426 /len=398                                                                                                |
| 100928_at            | -0.5381854 | 2.29E-04 | 532     | Cluster lnc X75285.Fibulin 2 /cnds=(50,3715) /gb=X75285 /gi=43704 /ug=Mm.6120 /len=4377                                                                                                                                                                          |
| 103089_at            | -0.5381854 | 2.29E-04 | 533     | Cluster lnc X53526.Mus musculus Bcm-1 mRNA for BCM1 antigen /cnds=(60,772) /gb=X53526 /gi=501138 /ug=Mm.1738 /len=1154                                                                                                                                           |
| 96525_at             | -0.5381854 | 2.29E-04 | 534     | Cluster lnc L12120.Interleukin 10 receptor, alpha /cnds=(79,1808) /gb=L12120 /gi=437615 /ug=Mm.28658 /len=3497                                                                                                                                                   |
| 96218_at             | -0.5381854 | 2.29E-04 | 535     | Cluster lnc AW214322.u40q12.x1 Mus musculus cDNA, 3 end /clone=IMAGE-2645062 /clone_end=3 /gb=AW214322 /gi=6520835 /ug=Mm.28696 /len=176                                                                                                                         |
| 160231_at            | -0.5381854 | 2.29E-04 | 536     | Cluster lnc AI851129.Ul-M-BHO-ajx-b-06-0-Ul.s1 Mus musculus cDNA, 3 end /clone=UI-M-BHO-ajx-b-06-0-Ul /clone_end=3 /gb=AI851129 /gi=5495075 /ug=Mm.27403 /len=340 /NOTE=replacement for probe set(s) 96673_at on MG-U74A                                         |
| 96302_at             | -0.5381854 | 2.29E-04 | 537     | Cluster lnc M32489.Interferon consensus sequence binding protein 57K1 mRNA /cnds=(20,1294) /gb=M32489 /gi=194088 /ug=Mm.3182 /len=2544                                                                                                                           |
| 97013_f_at           | -0.5381854 | 2.29E-04 | 538     | Cluster lnc AW046124.Ul-M-BH1-ajf-c-03-0-Ul.s1 Mus musculus cDNA, 3 end /clone=UI-M-BH1-ajf-c-03-0-Ul /clone_end=3 /gb=AW046124 /gi=5906653 /ug=Mm.88950 /len=249                                                                                                |
| 103342_at            | -0.5381854 | 2.29E-04 | 539     | Cluster lnc U78103.Embryonic ectoderm development /cnds=(453,1778) /gb=U78103 /gi=1710887 /ug=Mm.18203 /len=2040                                                                                                                                                 |
| 93507_at             | -0.5381854 | 2.29E-04 | 540     | Cluster lnc X62622.Tissue inhibitor of metalloproteinase 2 /cnds=(226,888) /gb=X62622 /gi=54801 /ug=Mm.19191 /len=1714                                                                                                                                           |
| 96693_at             | -0.5381854 | 2.29E-04 | 541     | Cluster lnc AI849453.Ul-M-AJ1-ahc-h-03-0-Ul.s1 Mus musculus cDNA, 3 end /clone=UI-M-AJ1-ahc-h-03-0-Ul /clone_end=3 /gb=AI849453 /gi=5493359 /ug=Mm.27526 /len=291                                                                                                |
| 10337_f_at           | -0.5381854 | 2.29E-04 | 542     | Cluster lnc AF100996.Mus musculus major histocompatibility locus class II region; Fas-binding protein Daxx (DAXX) gene, partial cds; Bing1 (BING1), tapasin (tapasin), Rai1/GDS-like factor (RLF), KE2 (KE2), BING4 (BING4), beta1, 3-galactosyl transferase (be |
| 99510_at             | -0.5381854 | 2.29E-04 | 543     | Cluster lnc X59274.Mus musculus mRNA for brain protein kinase C beta1 /cnds=UNKNOWN /gb=X59274 /gi=501185 /ug=Mm.4182 /len=2493                                                                                                                                  |
| 95015_at             | -0.5381854 | 2.29E-04 | 544     | Cluster lnc AB027125.Mus musculus AKR1C13 mRNA for Aldo-keto reductase AKR1C13, complete cds /cnds=(6,977) /gb=AB027125 /gi=6407375 /ug=Mm.27447 /len=1201                                                                                                       |
| 97945_at             | -0.5381854 | 2.29E-04 | 545     | Cluster lnc M16118.Mouse mRNA for T-cell receptor intrin A (chain) reactive alpha chain VJC, complete cds /cnds=(60,884) /gb=M16118 /gi=201154 /ug=Mm.30295 /len=1376                                                                                            |
| 92715_at             | -0.5381854 | 2.29E-04 | 546     | Cluster lnc AI078930.Mus musculus genomic DNA sequence from clone 57K1 on chromosome 17. Contains the gene for gamma-aminobutyric acid (GABA) B receptor 1, five 7 transmembrane receptor (rhodopsin family) protein genes and one p                             |
| 95955_at             | -0.5381854 | 2.29E-04 | 547     | Cluster lnc AI817740.u80d2.11 Mus musculus cDNA, 5 end /clone=IMAGE-1197167 /clone_end=5 /gb=AI817740 /gi=54717740 /ug=Mm.29540 /len=283                                                                                                                         |
| 103375_at            | -0.5381854 | 2.29E-04 | 548     | Cluster lnc AW050290.Ul-M-BH1-ans-f-05-0-Ul.s1 Mus musculus cDNA, 3 end /clone=UI-M-BH1-ans-f-05-0-Ul /clone_end=3 /gb=AW050290 /gi=5910819 /ug=Mm.18589 /len=373                                                                                                |
| 95415_f_at           | -0.5381854 | 2.29E-04 | 549     | Cluster lnc AI132585.ue97g10.x1 Mus musculus cDNA, 3 end /clone=IMAGE-1499959 /clone_end=3 /gb=AI132585 /gi=3602592 /ug=Mm.24276 /len=597                                                                                                                        |
| 162327_f_at          | -0.5381854 | 2.29E-04 | 550     | Cluster lnc AV084684.AV084684 Mus musculus cDNA /cnds=231008009 /clone_end=3 /gb=AV084684 /gi=5162132 /ug=Mm.4674 /len=249 /NOTE=replacement for probe set(s) 102445_at on MG-U74A                                                                               |
| 95498_at             | -0.5381854 | 2.29E-04 | 551     | Cluster lnc AI836029.Ul-M-ADO-ade-12-0-Ul.s2 Mus musculus cDNA, 3 end /clone=UI-M-ADO-ade-12-0-Ul /clone_end=3 /gb=AI836029 /gi=5477027 /ug=Mm.25143 /len=513                                                                                                    |
| 100496_at            | -0.5381854 | 2.29E-04 | 552     | Cluster lnc U15212.Mus musculus muscle glycogen synthase (clone H2) /cnds=(18,122) /gb=U15212 /gi=597497 /ug=Mm.3682 /len=2405                                                                                                                                   |
| 96387_f_at           | -0.5381854 | 2.29E-04 | 553     | Cluster lnc AI853864.Ul-M-BHO-ajf-f-08-0-Ul.s1 Mus musculus cDNA, 3 end /clone=UI-M-BHO-ajf-f-08-0-Ul /clone_end=3 /gb=AI853864 /gi=5497770 /ug=Mm.27477 /len=461                                                                                                |
| 98452_at             | -0.5381854 | 2.29E-04 | 554     | Cluster lnc D88689.Mus musculus mRNA for Rf-1, complete cds /cnds=(251,4252) /gb=D88689 /gi=2809068 /ug=Mm.3464 /len=6275                                                                                                                                        |
| 99115_at             | -0.5381854 | 2.29E-04 | 555     | Cluster lnc AW048350.Ul-M-BH1-ajl-a-01-0-Ul.s1 Mus musculus cDNA, 3 end /clone=UI-M-BH1-ajl-a-01-0-Ul /clone_end=3 /gb=AW048350 /gi=5906879 /ug=Mm.400 /len=253                                                                                                  |
| 160350_at            | -0.5381854 | 2.29E-04 | 556     | Cluster lnc X63508.Mus musculus YAP5 mRNA /cnds=(196,1619) /gb=X63508 /gi=51719 /ug=Mm.488 /len=125 /NOTE=replacement for probe set(s) 100140_at on MG-U74A                                                                                                      |
| 97406_at             | -0.5381854 | 2.29E-04 | 557     | Cluster lnc AW122258.Ul-M-BH2-2-acc-g-09-0-Ul.s1 Mus musculus cDNA, 3 end /clone=UI-M-BH2-2-acc-g-09-0-Ul /clone_end=3 /gb=AW122258 /gi=6097727 /ug=Mm.29914 /len=285                                                                                            |
| 93119_at             | -0.5381854 | 2.29E-04 | 558     | Cluster lnc X53157.Mouse mRNA for mitochondrial cytochrome c oxidase subunit Vb /cnds=(12,398) /gb=X53157 /gi=50530 /ug=Mm.16769 /len=475                                                                                                                        |
| 103811_at            | -0.5381854 | 2.29E-04 | 559     | Cluster lnc AJ010902.Mus musculus MRNA for inversin /cnds=(181,3369) /gb=AJ010902 /gi=3757671 /ug=Mm.20896 /len=5488                                                                                                                                             |
| 104550_f_at          | -0.5381854 |          |         |                                                                                                                                                                                                                                                                  |

## Supplemental DATA Table 1

Weisberg et al. Adipose tissue transcripts whose expression correlate with body mass

| Affymetrix Probe Set | ktau      | p-value  | klauder | Affymetrix Transcript Description                                                                                                                                                                                                                              |
|----------------------|-----------|----------|---------|----------------------------------------------------------------------------------------------------------------------------------------------------------------------------------------------------------------------------------------------------------------|
| 100711_at            | 0.5309126 | 2.78E-04 | 571     | Cluster lnc1 U12403.Mus musculus Csa-19 mRNA, complete cds (cds=(15,668) (gb=U12403 (gi=531168) (lug=U12403) (len=700)                                                                                                                                         |
| 102896_at            | 0.5309126 | 2.78E-04 | 572     | Cluster lnc1 U78818.Downstream of tyrosine kinase 1 (cds=(6,1454) (gb=U78818 (gi=1815655) (lug=Mm.156) (len=1749)                                                                                                                                              |
| 92688_at             | 0.5309126 | 2.78E-04 | 573     | Cluster lnc1 X57199.Acid phosphatase 2, lysosomal (cds=(0,1265) (gb=X57199 (gi=52870) (lug=Mm.45570) (len=1266)                                                                                                                                                |
| 101464_at            | 0.5309126 | 2.78E-04 | 574     | Cluster lnc1 V0555.interferon beta, fibroblast (cds=(0,116) (gb=V0555 (gi=154) (lug=Mm.45219) (len=222)                                                                                                                                                        |
| 100565_at            | 0.5309126 | 2.78E-04 | 575     | Cluster lnc1 AW123396.UJ-M-BH2.1-apf-h-12-UJ.s1 Mus musculus cDNA, 3 end (clone=UJ-M-BH2.1-apf-h-12-UJ (clone_end=3) (gb=AW123396 (gi=6069826) (lug=Mm.5736) (len=420)                                                                                         |
| 1004848_at           | 0.5309126 | 2.78E-04 | 576     | Cluster lnc1 M24119.Acid beta glucosidase (cds=(86,1633) (gb=M24119 (gi=193448) (lug=Mm.5031) (len=1884)                                                                                                                                                       |
| 160167_at            | 0.5309126 | 2.78E-04 | 577     | Cluster lnc1 AW121948.UJ-M-BH2.3-aoj-f-06-UJ.s1 Mus musculus cDNA, 3 end (clone=UJ-M-BH2.3-aoj-f-06-UJ (clone_end=3) (gb=AW121948 (gi=6097394) (lug=Mm.22687) (len=375) (NOTE=replacement for probe set(s) 94808_at on MG-U74A)                                |
| 103647_at            | 0.5309126 | 2.78E-04 | 578     | Cluster lnc1 M57734.Beta-galactosidase complex (cds=(73,2016) (gb=M57734 (gi=192186) (lug=Mm.2040) (len=2360)                                                                                                                                                  |
| 98603_s_at           | 0.5309126 | 2.78E-04 | 579     | Cluster lnc1 U20857.RAN GTPase activating protein 1 (cds=(0,1789) (gb=U20857 (gi=722239) (lug=Mm.3833) (len=1770)                                                                                                                                              |
| 98603_at             | 0.5309126 | 2.78E-04 | 580     | Cluster lnc1 D85785.Brain immunological-like with tyrosine-based motifs (cds=(294,1823) (gb=D85785 (gi=2190256) (lug=Mm.87860) (len=2572)                                                                                                                      |
| 104697_at            | 0.5309126 | 2.78E-04 | 581     | Cluster lnc1 AW121127.UJ-M-BH2.3-aoh-d-04-UJ.s1 Mus musculus cDNA, 3 end (clone=UJ-M-BH2.3-aoh-d-04-UJ (clone_end=3) (gb=AW121127 (gi=6096460) (lug=Mm.33722) (len=402)                                                                                        |
| 92387_at             | 0.5309126 | 2.78E-04 | 582     | Cluster lnc1 L18868.Thromboxane A synthase 1, platelet (cds=(36,1639) (gb=L18868 (gi=1763715) (lug=Mm.4054) (len=1847)                                                                                                                                         |
| 160996_at            | 0.5309126 | 2.78E-04 | 583     | Cluster lnc1 AV268207.AV268207 Mus musculus cDNA, 3 end (clone=IMAGE-2649278 (clone_end=3) (gb=AV268207 (gi=1557786) (lug=Mm.2186) (len=268) (NOTE=replacement for probe set(s) 104167_at on MG-U74A)                                                          |
| 97385_at             | 0.5309126 | 2.78E-04 | 584     | Cluster lnc1 AJ242005.Mus musculus mRNA for N-Acetylglucosaminase kinase (cds=(200,1240) (gb=AJ242005 (gi=5491782) (lug=Mm.29772) (len=1359)                                                                                                                   |
| 102000_f_at          | 0.530913  | 2.78E-04 | 585     | Cluster lnc1 AI842835.UJ-M-AN1-afb-a-07-UJ.s1 Mus musculus cDNA, 3 end (clone=UJ-M-AN1-afb-a-07-UJ (clone_end=3) (gb=AI842835 (gi=5477048) (lug=Mm.988) (len=287)                                                                                              |
| 100628_at            | 0.530913  | 2.78E-04 | 586     | Cluster lnc1 AI840263.UJ-M-AHO-act-e-04-UJ.s1 Mus musculus cDNA, 3 end (clone=UJ-M-AHO-act-e-04-UJ (clone_end=3) (gb=AI840263 (gi=5474476) (lug=Mm.666) (len=248)                                                                                              |
| 160096_at            | 0.530913  | 2.78E-04 | 587     | Cluster lnc1 AW122452.UJ-M-BH2.2-aoa-a-10-UJ.s1 Mus musculus cDNA, 3 end (clone=UJ-M-BH2.2-aoa-a-10-UJ (clone_end=3) (gb=AW122452 (gi=6097972) (lug=Mm.17224) (len=257) (NOTE=replacement for probe set(s) 93263_at on MG-U74A)                                |
| 92328_at             | 0.530913  | 2.78E-04 | 588     | Cluster lnc1 AB047499.Mus musculus mRNA for dolichol-phosphate-mannose synthase, complete cds (cds=(0,783) (gb=AB047499 (gi=3073772) (lug=Mm.12689) (len=789)                                                                                                  |
| 104258_at            | 0.530913  | 2.78E-04 | 589     | Cluster lnc1 AA881576.vx20d07.1 Mus musculus cDNA, 5 end (clone=IMAGE-1265005 (clone_end=5) (gb=AA881576 (gi=2990986) (lug=Mm.28407) (len=521)                                                                                                                 |
| 98085_at             | 0.530913  | 2.78E-04 | 590     | Cluster lnc1 X98456.Mus musculus ORF1 and ORF2 genes (cds=(0,512) (gb=X98456 (gi=1460069) (lug=Mm.57215) (len=513)                                                                                                                                             |
| 93443_at             | 0.530913  | 2.78E-04 | 591     | Cluster lnc1 AW212271.uo84g08.x1 Mus musculus cDNA, 3 end (clone=IMAGE-2649278 (clone_end=3) (gb=AW212271 (gi=6518306) (lug=Mm.6671) (len=420)                                                                                                                 |
| 93983_at             | 0.530913  | 2.78E-04 | 592     | Cluster lnc1 AI846382.UJ-M-AN1-afb-a-01-UJ.s1 Mus musculus cDNA, 3 end (clone=UJ-M-AN1-afb-a-01-UJ (clone_end=3) (gb=AI846382 (gi=5480288) (lug=Mm.21707) (len=357)                                                                                            |
| 96915_f_at           | 0.530913  | 2.78E-04 | 593     | Cluster lnc1 AA879774.vf08d04.r1 Mus musculus cDNA, 5 end (clone=IMAGE-1230439 (clone_end=5) (gb=AA879774 (gi=2988747) (lug=Mm.30150) (len=357)                                                                                                                |
| 101084_f_at          | 0.530913  | 2.78E-04 | 594     | Cluster lnc1 AI527477.vf12b04.y1 Mus musculus cDNA, 5 end (clone=IMAGE-1511119 (clone_end=5) (gb=AI527477 (gi=44441612) (lug=Mm.732) (len=450)                                                                                                                 |
| 161872_f_at          | 0.530913  | 2.78E-04 | 595     | Cluster lnc1 AV073962.AV073962 Mus musculus cDNA (cds=2201005/01 (clone_end=3) (gb=AV073962 (gi=5193700) (lug=Mm.75500) (len=253) (NOTE=replacement for probe set(s) 98659_f_at on MG-U74A)                                                                    |
| 160626_at            | 0.530913  | 2.78E-04 | 596     | Cluster lnc1 AI849354.UJ-M-AJ1-aha-g-02-UJ.s1 Mus musculus cDNA, 3 end (clone=UJ-M-AJ1-aha-g-02-UJ (clone_end=3) (gb=AI849354 (gi=5493260) (lug=Mm.18618) (len=441) (NOTE=replacement for probe set(s) 103380_at on MG-U74A)                                   |
| 104153_at            | 0.530913  | 2.78E-04 | 597     | Cluster lnc1 AW047743.UJ-M-BH1-alk-07-UJ.s1 Mus musculus cDNA, 3 end (clone=UJ-M-BH1-alk-07-UJ (clone_end=3) (gb=AW047743 (gi=6056222) (lug=Mm.22189) (len=339)                                                                                                |
| 97308_at             | 0.530913  | 2.78E-04 | 598     | Cluster lnc1 AI835409.UJ-M-AQ0-aaq-d-08-UJ.s1 Mus musculus cDNA, 3 end (clone=UJ-M-AQ0-aaq-d-08-UJ (clone_end=3) (gb=AI835409 (gi=5469622) (lug=Mm.28063) (len=314)                                                                                            |
| 97518_at             | 0.530913  | 2.78E-04 | 599     | Cluster lnc1 D29016.Mouse mRNA for squalene synthase (cds=(20,1270) (gb=D29016 (gi=488456) (lug=Mm.3204) (len=1634)                                                                                                                                            |
| 162358_i_at          | 0.530913  | 2.78E-04 | 600     | Cluster lnc1 AW218217.AV218217 Mus musculus cDNA, 3 end (clone=2900807121 (clone_end=3) (gb=AW218217 (gi=6159058) (lug=Mm.48939) (len=238) (NOTE=replacement for probe set(s) 102481_f_at on MG-U74A)                                                          |
| 160146_f_at          | 0.5326398 | 3.37E-04 | 601     | Cluster lnc1 AW20908.9u99g9.x1 Mus musculus cDNA, 3 end (clone=IMAGE-2582090 (clone_end=3) (gb=AW20908 (gi=6515038) (lug=Mm.56685) (len=486)                                                                                                                   |
| 100561_at            | 0.5326398 | 3.37E-04 | 602     | Cluster lnc1 AW20908.9u99g9.x1 Mus musculus cDNA, 3 end (clone=IMAGE-2582090 (clone_end=3) (gb=AW20908 (gi=6515038) (lug=Mm.56685) (len=486)                                                                                                                   |
| 98107_at             | 0.5326398 | 3.37E-04 | 603     | Cluster lnc1 AW123801.UJ-M-BH2.1-apm-e-08-UJ.s1 Mus musculus cDNA, 3 end (clone=UJ-M-BH2.1-apm-e-08-UJ (clone_end=3) (gb=AW123801 (gi=6099331) (lug=Mm.34796) (len=367)                                                                                        |
| 104156_r_at          | 0.5326398 | 3.37E-04 | 604     | Cluster lnc1 U19118.Mus musculus transcription factor LRG-21 mRNA, complete cds (cds=(167,712) (gb=U19118 (gi=633751) (lug=Mm.2706) (len=1897)                                                                                                                 |
| 93736_at             | 0.5326398 | 3.37E-04 | 605     | Cluster lnc1 M22998.Solute carrier family 2 (facilitated glucose transporter), member 1 (cds=(114,1592) (gb=M22998 (gi=193551) (lug=Mm.21002) (len=2473)                                                                                                       |
| 103637_at            | 0.5326398 | 3.37E-04 | 606     | Cluster lnc1 AJ223968.N-acetyl galactosaminidase, alpha (cds=(0,1247) (gb=AJ223968 (gi=3227015) (lug=Mm.20225) (len=1246)                                                                                                                                      |
| 102794_at            | 0.5326398 | 3.37E-04 | 607     | Cluster lnc1 Z80112.Mus musculus lcr-1 gene (cds=(0,1073) (gb=Z80112 (gi=2632100) (lug=Mm.1401) (len=1180)                                                                                                                                                     |
| 160835_i_at          | 0.5326398 | 3.37E-04 | 608     | Cluster lnc1 AI851695.UJ-M-BHO-ao-c-04-UJ.s1 Mus musculus cDNA, 3 end (clone=UJ-M-BHO-ao-c-04-UJ (clone_end=3) (gb=AI851695 (gi=5495601) (lug=Mm.3336) (len=444) (NOTE=replacement for probe set(s) 98399_at on MG-U74A)                                       |
| 906060_at            | 0.5326398 | 3.37E-04 | 609     | Cluster lnc1 U25844.Serine protease inhibitor 3 (cds=(67,1203) (gb=U25844 (gi=818902) (lug=Mm.2623) (len=1317)                                                                                                                                                 |
| 102337_s_at          | 0.5326398 | 3.37E-04 | 610     | Cluster lnc1 M31312.Mouse beta Fc receptor type II (FCRII) gene, complete cds (cds=(0,992) (gb=M31312 (gi=163260) (lug=Mm.10809) (len=993)                                                                                                                     |
| 94540_at             | 0.5326398 | 3.37E-04 | 611     | Cluster lnc1 AI516650.u3i033.x1 Mus musculus cDNA, 3 end (clone=IMAGE-1021541 (clone_end=3) (gb=AI516650 (gi=4030971) (lug=Mm.28078) (len=514)                                                                                                                 |
| 92668_at             | 0.5326398 | 3.37E-04 | 612     | Cluster lnc1 L10627.Bruton agammaglobulinemia tyrosine kinase (cds=UNKNOWN (gb=L10627 (gi=193016) (lug=Mm.4475) (len=2546)                                                                                                                                     |
| 97909_at             | 0.5326398 | 3.37E-04 | 613     | Cluster lnc1 AI838080.UJ-M-ALD-abv-e-12-UJ.s1 Mus musculus cDNA, 3 end (clone=UJ-M-ALD-abv-e-12-UJ (clone_end=3) (gb=AI838080 (gi=5472293) (lug=Mm.28479) (len=226)                                                                                            |
| 103436_at            | 0.5326398 | 3.37E-04 | 614     | Cluster lnc1 M57696.Yamaguchi sarcoma viral (yves-1) oncogene homolog (cds=(86,1623) (gb=M57696 (gi=198940) (lug=Mm.1834) (len=2766)                                                                                                                           |
| 95153_at             | 0.5326398 | 3.37E-04 | 615     | Cluster lnc1 AI845988.UJ-M-AP1-afp-g-01-UJ.s1 Mus musculus cDNA, 3 end (clone=UJ-M-AP1-afp-g-01-UJ (clone_end=3) (gb=AI845988 (gi=5493984) (lug=Mm.29476) (len=435)                                                                                            |
| 100578_at            | 0.5326398 | 3.37E-04 | 616     | Cluster lnc1 M30304.Mus musculus IMP dehydrogenase mRNA, complete cds (cds=(66,1610) (gb=M30304 (gi=198333) (lug=Mm.6065) (len=1707)                                                                                                                           |
| 161808_f_at          | 0.5326398 | 3.37E-04 | 617     | Cluster lnc1 AV371846.AV371846 Mus musculus cDNA, 3 end (clone=AV371846 (gi=6149493) (lug=Mm.91024) (len=237) (NOTE=replacement for probe set(s) 98223_f_at on MG-U74A)                                                                                        |
| 92603_at             | 0.5326398 | 3.37E-04 | 618     | Cluster lnc1 U13840.Mus musculus vacuolar adenosine triphosphatase subunit D mRNA, complete cds (cds=(17,1072) (gb=U13840 (gi=3955099) (lug=Mm.1081) (len=1509)                                                                                                |
| 103006_r_at          | 0.5326398 | 3.37E-04 | 619     | Cluster lnc1 AW121438.UJ-M-BH2.2-aoc-c-10-UJ.s1 Mus musculus cDNA, 3 end (clone=UJ-M-BH2.2-aoc-c-10-UJ (clone_end=3) (gb=AW121438 (gi=6096771) (lug=Mm.20156) (len=269)                                                                                        |
| 100915_f_at          | 0.5326398 | 3.37E-04 | 620     | Cluster lnc1 AW125998.UJ-M-BH2.2-aoj-f-10-UJ.s1 Mus musculus cDNA, 3 end (clone=UJ-M-BH2.2-aoj-f-10-UJ (clone_end=3) (gb=AW125998 (gi=6051228) (lug=Mm.5938) (len=128)                                                                                         |
| 97419_at             | 0.5326398 | 3.37E-04 | 621     | Cluster lnc1 AW060956.UJ-M-BH1-amb-g-02-UJ.s1 Mus musculus cDNA, 3 end (clone=UJ-M-BH1-amb-g-02-UJ (clone_end=3) (gb=AW060956 (gi=6008707) (lug=Mm.29985) (len=493)                                                                                            |
| 104314_r_at          | 0.5326398 | 3.37E-04 | 622     | Cluster lnc1 AI851206.UJ-M-BHO-aj-f-05-UJ.s1 Mus musculus cDNA, 3 end (clone=UJ-M-BHO-aj-f-05-UJ (clone_end=3) (gb=AI851206 (gi=5495112) (lug=Mm.22405) (len=405)                                                                                              |
| 102720_at            | 0.5326398 | 3.37E-04 | 623     | Cluster lnc1 X71426.Endothelial-specific receptor tyrosine kinase (cds=(86,3454) (gb=X71426 (gi=296612) (lug=Mm.14313) (len=3490)                                                                                                                              |
| 1610263_at           | 0.5326398 | 3.37E-04 | 624     | Cluster lnc1 AI849853.UJ-M-AN1-afb-a-10-UJ.s1 Mus musculus cDNA, 3 end (clone=UJ-M-AN1-afb-a-10-UJ (clone_end=3) (gb=AI849853 (gi=5430349) (lug=Mm.14523) (len=257) (NOTE=replacement for probe set(s) 92431_at on MG-U74A)                                    |
| 103414_at            | 0.5326398 | 3.37E-04 | 625     | Cluster lnc1 AF049850.Mus musculus major histocompatibility locus class III region-expressing C4 (C4) and cytochrome P450 hydroxylase A (CYP210H-A) genes, complete cds; slp pseudogene, complete sequence, NG6, SK1, and complement factor B (Bf) genes, comp |
| 94829_at             | 0.5326398 | 3.37E-04 | 626     | Cluster lnc1 AW121838.UJ-M-BH2.3-amx-h-10-UJ.s2 Mus musculus cDNA, 3 end (clone=UJ-M-BH2.3-amx-h-10-UJ (clone_end=3) (gb=AW121838 (gi=6097212) (lug=Mm.22746) (len=319)                                                                                        |
| 160216_at            | 0.5326398 | 3.37E-04 | 627     | Cluster lnc1 AW123751.UJ-M-BH2.1-apm-a-05-UJ.s1 Mus musculus cDNA, 3 end (clone=UJ-M-BH2.1-apm-a-05-UJ (clone_end=3) (gb=AW123751 (gi=6099281) (lug=Mm.26792) (len=421) (NOTE=replacement for probe set(s) 96100_at on MG-U74A)                                |
| 96261_f_at           | 0.5326398 | 3.37E-04 | 628     | Cluster lnc1 AW122694.UJ-M-BH2.2-aoc-b-04-UJ.s1 Mus musculus cDNA, 3 end (clone=UJ-M-BH2.2-aoc-b-04-UJ (clone_end=3) (gb=AW122694 (gi=60969224) (lug=Mm.29828) (len=456)                                                                                       |
| 94982_f_at           | 0.5326398 | 3.37E-04 | 629     | Cluster lnc1 AI852470.UJ-M-BHO-aj-f-08-UJ.s1 Mus musculus cDNA, 3 end (clone=UJ-M-BHO-aj-f-08-UJ (clone_end=3) (gb=AI852470 (gi=5498376) (lug=Mm.22778) (len=422)                                                                                              |
| 160776_at            | 0.5326398 | 3.37E-04 | 630     | Cluster lnc1 AW048886.UJ-M-BH1-amf-f-09-UJ.s1 Mus musculus cDNA, 3 end (clone=UJ-M-BH1-amf-f-09-UJ (clone_end=3) (gb=AW048886 (gi=5909415) (lug=Mm.28333) (len=463) (NOTE=replacement for probe set(s) 96159_at on MG-U74A)                                    |
| 94508_at             | 0.5326398 | 3.37E-04 | 631     | Cluster lnc1 AI853772.UJ-M-BHO-aj-e-02-UJ.s1 Mus musculus cDNA, 3 end (clone=UJ-M-BHO-aj-e-02-UJ (clone_end=3) (gb=AI853772 (gi=5497678) (lug=Mm.28963) (len=394)                                                                                              |
| 100808_at            | 0.5326398 | 3.37E-04 | 632     | Cluster lnc1 U35741.Thiosulfate sulfurtransferase, mitochondrial (cds=(14,907) (gb=U35741 (gi=1148431) (lug=Mm.16312) (len=1016) (NOTE=replacement for probe set(s) 93052_at on MG-U74A)                                                                       |
| 94078_at             | 0.5326398 | 3.37E-04 | 633     | Cluster lnc1 AW046239.UJ-M-BH1-afb-a-12-UJ.s1 Mus musculus cDNA, 3 end (clone=UJ-M-BH1-afb-a-12-UJ (clone_end=3) (gb=AW046239 (gi=5905788) (lug=Mm.22138) (len=363)                                                                                            |
| 162343_f_at          | 0.5326398 | 3.37E-04 | 634     | Cluster lnc1 AV149071.AV149071 Mus musculus cDNA (cds=3810484/11 (clone_end=3) (gb=AV149071 (gi=6332034) (lug=Mm.48322) (len=303) (NOTE=replacement for probe set(s) 102463_f_at on MG-U74A)                                                                   |
| 93173_at             | 0.5326398 | 3.37E-04 | 635     | Cluster lnc1 AI845814.UJ-M-A01-aeg-b-01-UJ.s1 Mus musculus cDNA, 3 end (clone=UJ-M-A01-aeg-b-01-UJ (clone_end=3) (gb=AI845814 (gi=5489720) (lug=Mm.5353) (len=302)                                                                                             |
| 101094_at            | 0.5326398 | 3.37E-04 | 636     | Cluster lnc1 AI838820.UJ-M-AJ0-abd-c-01-UJ.s1 Mus musculus cDNA, 3 end (clone=UJ-M-AJ0-abd-c-01-UJ (clone_end=3) (gb=AI838820 (gi=5471033) (lug=Mm.7381) (len=357)                                                                                             |
| 100963_at            | 0.5326398 | 3.37E-04 | 637     | Cluster lnc1 AI854243.UJ-M-BHO-aj-h-05-UJ.s1 Mus musculus cDNA, 3 end (clone=UJ-M-BHO-aj-h-05-UJ (clone_end=3) (gb=AI854243 (gi=5498149) (lug=Mm.6560) (len=509)                                                                                               |
| 92536_at             | 0.5326398 | 3.37E-04 | 638     | Cluster lnc1 X72862.Adrenergic receptor, beta 3 (cds=(82,1384) (gb=X72862 (gi=208112) (lug=Mm.4369) (len=2093)                                                                                                                                                 |
| 95090_at             | 0.5326398 | 3.37E-04 | 639     | Cluster lnc1 AA688600.vv1809.r1 Mus musculus cDNA, 5 end (clone=IMAGE-1181033 (clone_end=5) (gb=AA688600 (gi=2678029) (lug=Mm.29269) (len=362)                                                                                                                 |
| 93283_at             | 0.5290448 | 3.62E-04 | 640     | Cluster lnc1 AA869401.vq0704.r1 Mus musculus cDNA, 5 end (clone=IMAGE-1093567 (clone_end=5) (gb=AA869401 (gi=2964846) (lug=Mm.1786) (len=793)                                                                                                                  |
| 161511_f_at          | 0.5290448 | 3.62E-04 | 641     | Cluster lnc1 AV152244.AV152244 Mus musculus cDNA (cds=2900304/12 (clone_end=3) (gb=AV152244 (gi=5357450) (lug=Mm.65046) (len=139) (NOTE=replacement for probe set(s) 95830_r_at on MG-U74A)                                                                    |
| 101654_at            | 0.5290448 | 3.62E-04 | 642     | Cluster lnc1 X53288.Mus musculus genes H2b-143, H3-143 (cds=(0,380) (gb=X53288 (gi=1951834) (lug=Mm.9040) (len=380)                                                                                                                                            |
| 103539_at            | 0.516367  | 4.08E-04 | 643     | Cluster lnc1 X55663.Cytoplasmic tyrosine kinase, Dcc28c related (Drosophila) (cds=(427,2010) (gb=X55663 (gi=54767) (lug=Mm.2350) (len=2577)                                                                                                                    |
| 160248_at            | 0.516367  | 4.08E-04 | 644     | Cluster lnc1 U44426.Tumor protein D52 (cds=(21,578) (gb=U44426 (gi=1469925) (lug=Mm.2777) (len=2033) (NOTE=replacement for probe set(s) 97225_at on MG-U74A)                                                                                                   |
| 93235_at             | 0.516367  | 4.08E-04 | 645     | Cluster lnc1 AI020029.ab24c02.r1 Mus musculus cDNA, 5 end (clone=IMAGE-1378658 (clone_end=5) (gb=AI020029 (gi=3234365) (lug=Mm.5833) (len=468)                                                                                                                 |
| 103514_at            | 0.516367  | 4.08E-04 | 646     | Cluster lnc1 AI850244.UJ-M-BG1-ae-f-02-UJ.s1 Mus musculus cDNA, 3 end (clone=UJ-M-BG1-ae-f-02-UJ (clone_end=3) (gb=AI850244 (gi=5494150) (lug=Mm.22649) (len=362)                                                                                              |
| 101919_f_at          | 0.516367  | 4.08E-04 | 647     | Cluster lnc1 AJ098622.Mus musculus mRNA for transforming growth factor beta 1 (cds=(0,2094) (gb=AJ098622 (gi=3688423) (lug=Mm.9154) (len=2094)                                                                                                                 |
| 100581_at            | 0.516367  | 4.08E-04 | 648     | Cluster lnc1 U58087.Cystatin B (cds=(0,296) (gb=U58087 (gi=1439569) (lug=Mm.6095) (len=297)                                                                                                                                                                    |
| 95940_f_at           | 0.516367  | 4.08E-04 | 649     | Cluster lnc1 AW047237.UJ-M-BH1-amb-g-05-UJ.s1 Mus musculus cDNA, 3 end (clone=UJ-M-BH1-amb-g-05-UJ (clone_end=3) (gb=AW047237 (gi=5907766) (lug=Mm.24851) (len=420)                                                                                            |
| 103997_at            | 0.516367  | 4.08E-04 | 650     | Cluster lnc1 X53081.Erythropoietin receptor (cds=(45,1568) (gb=X53081 (gi=50861) (lug=Mm.2653) (len=1569)                                                                                                                                                      |
| 93598_at             | 0.516367  | 4.08E-04 | 651     | Cluster lnc1 Z54178.Mus musculus mRNA for involucrin (                                                                                                                                                                                                         |

## Supplemental DATA Table 1

Weisberg et al. Adipose tissue transcripts whose expression correlate with body mass

| Affymetrix Probe Set | ktau      | p-value  | klauder | Affymetrix Transcript Description                                                                                                                                                                                                    |
|----------------------|-----------|----------|---------|--------------------------------------------------------------------------------------------------------------------------------------------------------------------------------------------------------------------------------------|
| 94704_at             | 0.516367  | 4.08E-04 | 666     | Cluster lnc AF100778:Mus musculus connective tissue growth factor related protein WISP-2 (Wisp2) mRNA, complete cds (cds=256,1011) (gb=AF100778) (ig=4028578) (ug=Mm.13828) (len=1734)                                               |
| 93783_at             | 0.516367  | 4.08E-04 | 667     | Cluster lnc M27347:Mus musculus p6-5 gene, 3 end (cds=0,710) (gb=M27347) (ig=200267) (ug=Mm.2131) (len=986)                                                                                                                          |
| 99505_at             | 0.516367  | 4.08E-04 | 668     | Cluster lnc AI844664:U1-M-AL1-ahv-d-11-0-U1.s1 Mus musculus cDNA, 3 end (cds=U1-M-AL1-ahv-d-11-0-U1) (clone_end=3) (gb=AI844664) (ig=5488570) (ug=Mm.41750) (len=434)                                                                |
| 161610_c_at          | 0.516367  | 4.08E-04 | 669     | Cluster lnc AI49686:AV349686:Mus musculus cDNA, 3 end (cds=AI49686) (clone_end=3) (gb=AI49686) (ig=5490940) (ug=Mm.25548) (len=407)                                                                                                  |
| 92826_at             | 0.516367  | 4.08E-04 | 670     | Cluster lnc Y17852:Mus musculus mRNA for ganglioside-induced differentiation associated protein 3 (cds=0,385) (gb=Y17852) (ig=5378457) (ug=Mm.12662) (len=651)                                                                       |
| 102969_at            | 0.516367  | 4.08E-04 | 671     | Cluster lnc AI847369:U1-M-AN1-afh-g-0-0-U1.s1 Mus musculus cDNA, 3 end (cds=U1-M-AN1-afh-g-0-0-U1) (clone_end=3) (gb=AI847369) (ig=5401240) (ug=Mm.183) (len=436)                                                                    |
| 102397_at            | 0.516367  | 4.08E-04 | 672     | Cluster lnc AF038029:Mus musculus ETOMTGS-related protein ETO-2 mRNA, complete cds (cds=98,1960) (gb=AF038029) (ig=2723940) (ug=Mm.12429) (len=2691)                                                                                 |
| 161221_f_at          | 0.516367  | 4.08E-04 | 673     | Cluster lnc AV253908:AV253908:Mus musculus cDNA, 3 end (cds=46215068F10) (clone_end=3) (gb=AV253908) (ig=6261367) (ug=Mm.84027) (len=247) (NOTE:replacement for probe set) 100871_f_at on MG-U74A                                    |
| 102742_g_at          | 0.516367  | 4.08E-04 | 674     | Cluster lnc M18775:Microtubule-associated protein tau (cds=186,1211) (gb=M18775) (ig=201114) (ug=Mm.1287) (len=126)                                                                                                                  |
| 103807_at            | 0.516367  | 4.08E-04 | 675     | Cluster lnc AB012265:Mus musculus mRNA for wldz, complete cds (cds=772,5457) (gb=AB012265) (ig=3551181) (ug=Mm.20878) (len=6425)                                                                                                     |
| 160749_at            | 0.516367  | 4.08E-04 | 676     | Cluster lnc AI848812:U1-M-A11-afk-a-06-0-U1.s1 Mus musculus cDNA, 3 end (cds=U1-M-A11-afk-a-06-0-U1) (clone_end=3) (gb=AI848812) (ig=5490718) (ug=Mm.27662) (len=435) (NOTE:replacement for probe set) 95535_at on MG-U74A           |
| 160556_at            | 0.516367  | 4.08E-04 | 677     | Cluster lnc AW048976:U1-M-BH1-amh-h-09-0-U1.s1 Mus musculus cDNA, 3 end (cds=U1-M-BH1-amh-h-09-0-U1) (clone_end=3) (gb=AW048976) (ig=5909505) (ug=Mm.88572) (len=391) (NOTE:replacement for probe set) 101547_at on MG-U74A          |
| 98892_at             | 0.516367  | 4.08E-04 | 678     | Cluster lnc AA388099:AA388099:Mus musculus cDNA, 5 end (cds=AA388099) (clone_end=5) (gb=AA388099) (ig=2041044) (ug=Mm.21103) (len=564)                                                                                               |
| 160481_at            | 0.516367  | 4.08E-04 | 679     | Cluster lnc AF090605:Mus musculus phosphoenolpyruvate carboxylase (PEPCK) gene, complete cds (cds=140,2008) (gb=AF090605) (ig=401281) (ug=Mm.42246) (len=2618) (NOTE:replacement for probe set) 90568_at on MG-U74A                  |
| 94912_at             | 0.516367  | 4.08E-04 | 680     | Cluster lnc AI835592:U1-M-AIO-aap-a-05-0-U1.s1 Mus musculus cDNA, 3 end (cds=U1-M-AIO-aap-a-05-0-U1) (clone_end=3) (gb=AI835592) (ig=5468805) (ug=Mm.24108) (len=229)                                                                |
| 95067_at             | 0.516367  | 4.08E-04 | 681     | Cluster lnc AI837821:U1-M-AKO-adi-h-06-0-U1.s1 Mus musculus cDNA, 3 end (cds=U1-M-AKO-adi-h-06-0-U1) (clone_end=3) (gb=AI837821) (ig=5472034) (ug=Mm.29183) (len=468)                                                                |
| 103560_at            | 0.516367  | 4.08E-04 | 682     | Cluster lnc AW124401:U1-M-BH2-1-ape-d-0-0-U1.s1 Mus musculus cDNA, 3 end (cds=U1-M-BH2-1-ape-d-0-0-U1) (clone_end=3) (gb=AW124401) (ig=6099931) (ug=Mm.19119) (len=217)                                                              |
| 99024_at             | 0.516367  | 4.08E-04 | 683     | Cluster lnc U32395:Mus musculus Max-interacting transcriptional repressor (Max4) mRNA, complete cds (cds=0,629) (gb=U32395) (ig=1184158) (ug=Mm.38795) (len=630)                                                                     |
| 101082_at            | 0.516367  | 4.08E-04 | 684     | Cluster lnc J02652:Maic enzyme, supermatant (cds=65,1783) (gb=J02652) (ig=199762) (ug=Mm.730) (len=3129)                                                                                                                             |
| 161364_f_at          | 0.516367  | 4.08E-04 | 685     | Cluster lnc AV222925:AV222925:Mus musculus cDNA, 3 end (cds=3830404010) (clone_end=3) (gb=AV222925) (ig=6172102) (ug=Mm.59470) (len=258) (NOTE:replacement for probe set) 94656_f_at on MG-U74A                                      |
| 100973_t_at          | 0.516367  | 4.08E-04 | 686     | Cluster lnc AA672499:AA672499:Mus musculus cDNA, 5 end (cds=AA672499) (clone_end=5) (gb=AA672499) (ig=2644716) (ug=Mm.6660) (len=391)                                                                                                |
| 103862_f_at          | 0.516367  | 4.08E-04 | 687     | Cluster lnc AA388099:AA388099:Mus musculus cDNA, 5 end (cds=AA388099) (clone_end=5) (gb=AA388099) (ig=2041044) (ug=Mm.21103) (len=564)                                                                                               |
| 102327_at            | 0.516367  | 4.08E-04 | 688     | Cluster lnc AF078705:Amine oxidase, copper containing 3 (cds=0,2297) (gb=AF078705) (ig=3603354) (ug=Mm.10734) (len=2298)                                                                                                             |
| 97342_at             | 0.516367  | 4.08E-04 | 689     | Cluster lnc AW060867:U1-M-BH1-amx-f-08-0-U1.s1 Mus musculus cDNA, 3 end (cds=U1-M-BH1-amx-f-08-0-U1) (clone_end=3) (gb=AW060867) (ig=6006818) (ug=Mm.29599) (len=418)                                                                |
| 160350_at            | 0.516367  | 4.08E-04 | 690     | Cluster lnc AW060750:U1-M-BH1-anu-b-12-0-U1.s1 Mus musculus cDNA, 3 end (cds=U1-M-BH1-anu-b-12-0-U1) (clone_end=3) (gb=AW060750) (ig=6008501) (ug=Mm.29652) (len=549) (NOTE:replacement for probe set) 95691_at on MG-U74A           |
| 95549_at             | 0.513621  | 4.37E-04 | 691     | Cluster lnc D13545:DNA primase, p58 subunit (cds=144,1661) (gb=D13545) (ig=303662) (ug=Mm.27705) (len=1937)                                                                                                                          |
| 94211_at             | 0.513621  | 4.37E-04 | 692     | Cluster lnc AA859180:AA859180:Mus musculus cDNA, 5 end (cds=AA859180) (clone_end=5) (gb=AA859180) (ig=3124373) (ug=Mm.2214) (len=347)                                                                                                |
| 95444_at             | 0.509043  | 4.92E-04 | 693     | Cluster lnc AW122274:U1-M-BH2-2-aos-a-0-0-U1.s1 Mus musculus cDNA, 3 end (cds=U1-M-BH2-2-aos-a-0-0-U1) (clone_end=3) (gb=AW122274) (ig=6097751) (ug=Mm.24584) (len=261)                                                              |
| 98045_s_at           | 0.509043  | 4.92E-04 | 694     | Cluster lnc I18889:Mus musculus mitogen-responsive 96 kDa phosphoprotein p96 mRNA, alternatively spliced p67 mRNA, and alternatively spliced p93 mRNA, complete cds (cds=216,2516) (gb=I18889) (ig=1176369) (ug=Mm.34248) (len=3347) |
| 100479_at            | 0.509043  | 4.92E-04 | 695     | Cluster lnc AA756653:AA756653:Mus musculus cDNA, 5 end (cds=AA756653) (clone_end=5) (gb=AA756653) (ig=2603851) (ug=Mm.5001) (len=393)                                                                                                |
| 94929_at             | 0.509043  | 4.92E-04 | 696     | Cluster lnc I69750:Mouse lysine lysine phosphatase (PTP-1), (CC2) 71, 112) mRNA, (cds=UNKNOW) (ig=607650) (ig=200581) (ug=Mm.2668) (len=1664)                                                                                        |
| 94147_at             | 0.509043  | 4.92E-04 | 697     | Cluster lnc M33060:Mouse plasminogen activator inhibitor (PAI-1) mRNA, complete cds (cds=131,1339) (gb=M33060) (ig=200219) (ug=Mm.1253) (len=2999)                                                                                   |
| 94505_at             | 0.509043  | 4.92E-04 | 698     | Cluster lnc AW124934:U1-M-BH2-1-apu-g-11-0-U1.s1 Mus musculus cDNA, 3 end (cds=U1-M-BH2-1-apu-g-11-0-U1) (clone_end=3) (gb=AW124934) (ig=6100464) (ug=Mm.28957) (len=425)                                                            |
| 99366_at             | 0.509043  | 4.92E-04 | 699     | Cluster lnc AI535336:AV335336:Mus musculus cDNA, 3 end (cds=AI535336) (clone_end=3) (gb=AI535336) (ig=4485899) (ug=Mm.5675) (len=408)                                                                                                |
| 160936_at            | 0.509043  | 4.92E-04 | 700     | Cluster lnc AA739337:AA739337:Mus musculus cDNA, 5 end (cds=AA739337) (clone_end=5) (gb=AA739337) (ig=2811459) (ug=Mm.89875) (len=502) (NOTE:replacement for probe set) 101911_at on MG-U74A                                         |
| 160491_at            | 0.509043  | 4.92E-04 | 701     | Cluster lnc D16432:CD63 antigen (cds=45,770) (gb=D16432) (ig=648052) (ug=Mm.4426) (len=787) (NOTE:replacement for probe set) 100045_at on MG-U74A                                                                                    |
| 103205_at            | 0.509043  | 4.92E-04 | 702     | Cluster lnc AI286861:AI286861:Mus musculus cDNA, 5 end (cds=AI286861) (clone_end=5) (gb=AI286861) (ig=3920614) (ug=Mm.19185) (len=2553)                                                                                              |
| 102936_at            | 0.509043  | 4.92E-04 | 703     | Cluster lnc AW125314:U1-M-BH2-1-apy-d-10-0-U1.s1 Mus musculus cDNA, 3 end (cds=U1-M-BH2-1-apy-d-10-0-U1) (clone_end=3) (gb=AW125314) (ig=6100844) (ug=Mm.16923) (len=295)                                                            |
| 103038_at            | 0.509043  | 4.92E-04 | 704     | Cluster lnc I36860:Guanylate cyclase activator 1a (retina) (cds=22,630) (gb=I36860) (ig=623416) (ug=Mm.16224) (len=644)                                                                                                              |
| 94288_at             | 0.509043  | 4.92E-04 | 705     | Cluster lnc J03482:Mouse histone H1 gene, complete cds (cds=42,680) (gb=J03482) (ig=193847) (ug=Mm.22570) (len=725)                                                                                                                  |
| 93595_at             | 0.509043  | 4.92E-04 | 706     | Cluster lnc AF117172:Mus musculus lysosomal peptidase precursor (C20) mRNA, complete cds (cds=28,1716) (gb=AF117172) (ig=4106912) (ug=Mm.20837) (len=2270)                                                                           |
| 104508_at            | 0.509043  | 4.92E-04 | 707     | Cluster lnc AA756506:AA756506:Mus musculus cDNA, 5 end (cds=AA756506) (clone_end=5) (gb=AA756506) (ig=2803704) (ug=Mm.30805) (len=473)                                                                                               |
| 160602_at            | 0.509043  | 4.92E-04 | 708     | Cluster lnc AF039216:Mus musculus rod phosphodiesterase delta subunit mRNA, complete cds (cds=111,563) (gb=AF039216) (ig=3293258) (ug=Mm.12925) (len=1050) (NOTE:replacement for probe set) 102756_at on MG-U74A                     |
| 100046_at            | 0.509043  | 4.92E-04 | 709     | Cluster lnc J04627:Mouse NAD-dependent methylethylethylhydrofolate dehydrogenase - methylethylethylhydrofolate cyclohydrolase mRNA, complete cds (cds=UNKNOW) (ig=J04627) (ig=200070) (ug=Mm.443) (len=2012)                         |
| 104365_at            | 0.509043  | 4.92E-04 | 710     | Cluster lnc AW046162:U1-M-BH1-ahv-b-0-0-U1.s1 Mus musculus cDNA, 3 end (cds=U1-M-BH1-ahv-b-0-0-U1) (clone_end=3) (gb=AW046162) (ig=5906691) (ug=Mm.22615) (len=466)                                                                  |
| 101966_s_at          | 0.509043  | 4.92E-04 | 711     | Cluster lnc AF037206:Mus musculus RING zinc finger protein (Rzf) mRNA, alternatively spliced product, complete cds (cds=88,894) (gb=AF037206) (ig=2746336) (ug=Mm.9326) (len=1072)                                                   |
| 97198_at             | 0.509043  | 4.92E-04 | 712     | Cluster lnc X75926:ATP-binding cassette 1 (cds=263,6868) (gb=X75926) (ig=496256) (ug=Mm.369) (len=7878)                                                                                                                              |
| 94789_r_at           | 0.509043  | 4.92E-04 | 713     | Cluster lnc X04663:Mouse mRNA for beta-tubulin (isotype Mbeta 5) (cds=78,1412) (gb=X04663) (ig=55047) (ug=Mm.1703) (len=1591)                                                                                                        |
| 98915_at             | 0.509043  | 4.92E-04 | 714     | Cluster lnc AF005036:Mus musculus secretory carrier membrane protein (SCAMP3) mRNA, complete cds (cds=14,1063) (gb=AF005036) (ig=2232236) (ug=Mm.3230) (len=1391)                                                                    |
| 93722_at             | 0.509043  | 4.92E-04 | 715     | Cluster lnc AJ050965:Mus musculus alpha-endothelin (complete) (cds=0,119) (gb=AJ050965) (ig=36904) (len=366)                                                                                                                         |
| 96249_at             | 0.509043  | 4.92E-04 | 716     | Cluster lnc AW122105:U1-M-BH2-2-aoo-h-12-0-U1.s1 Mus musculus cDNA, 3 end (cds=U1-M-BH2-2-aoo-h-12-0-U1) (clone_end=3) (gb=AW122105) (ig=6097518) (ug=Mm.29812) (len=357)                                                            |
| 93758_at             | 0.509043  | 4.92E-04 | 717     | Cluster lnc AA823653:AA823653:Mus musculus cDNA, 5 end (cds=AA823653) (clone_end=5) (gb=AA823653) (ig=2893521) (ug=Mm.21140) (len=554)                                                                                               |
| 161666_f_at          | 0.509043  | 4.92E-04 | 718     | Cluster lnc AV138783:AV138783:Mus musculus cDNA (cds=2810046L02) (clone_end=3) (gb=AV138783) (ig=5352451) (ug=Mm.70481) (len=216) (NOTE:replacement for probe set) 97065_at on MG-U74A                                               |
| 96055_at             | 0.509043  | 4.92E-04 | 719     | Cluster lnc X5925:Cholecytophilin (cds=64,411) (gb=X5925) (ig=19416) (ug=Mm.261) (len=569)                                                                                                                                           |
| 95670_at             | 0.509043  | 4.92E-04 | 720     | Cluster lnc AI835912:U1-M-AIO-aao-a-07-0-U1.s1 Mus musculus cDNA, 3 end (cds=U1-M-AIO-aao-a-07-0-U1) (clone_end=3) (gb=AI835912) (ig=5470120) (ug=Mm.29609) (len=455)                                                                |
| 96797_s_at           | 0.509094  | 4.92E-04 | 721     | Cluster lnc AW122681:U1-M-BH2-2-aot-a-02-0-U1.s1 Mus musculus cDNA, 3 end (cds=U1-M-BH2-2-aot-a-02-0-U1) (clone_end=3) (gb=AW122681) (ig=6088211) (ug=Mm.29170) (len=349)                                                            |
| 102754_at            | 0.509094  | 4.92E-04 | 722     | Cluster lnc Y17267:Mus musculus mRNA for ubiquitin conjugating enzyme (cds=258,14795) (gb=Y17267) (ig=3119989) (ug=Mm.12321) (len=15475)                                                                                             |
| 98574_at             | 0.509094  | 4.92E-04 | 723     | Cluster lnc AI835685:U1-M-AJO-aau-g-09-0-U1.s1 Mus musculus cDNA, 3 end (cds=U1-M-AJO-aau-g-09-0-U1) (clone_end=3) (gb=AI835685) (ig=5468988) (ug=Mm.3757) (len=227)                                                                 |
| 100040_at            | 0.509094  | 4.92E-04 | 724     | Cluster lnc AI843081:U1-M-AKI-aes-a-06-0-U1.s1 Mus musculus cDNA, 3 end (cds=U1-M-AKI-aes-a-06-0-U1) (clone_end=3) (gb=AI843081) (ig=5477294) (ug=Mm.44229) (len=232)                                                                |
| 92808_f_at           | 0.509094  | 4.92E-04 | 725     | Cluster lnc X17069:Mouse mRNA for protein with homology to transition protein 2 (TP2) (cds=123,1358) (gb=X17069) (ig=54875) (ug=Mm.12758) (len=2026)                                                                                 |
| 160345_at            | 0.509094  | 4.92E-04 | 726     | Cluster lnc AW125662:U1-M-BH2-2-aq-b-05-0-U1.s1 Mus musculus cDNA, 3 end (cds=U1-M-BH2-2-aq-b-05-0-U1) (clone_end=3) (gb=AW125662) (ig=6101092) (ug=Mm.29489) (len=391) (NOTE:replacement for probe set) 95100_at on MG-U74A         |
| 99617_at             | 0.509094  | 4.92E-04 | 727     | Cluster lnc AI846299:U1-M-AKI-aez-f-12-0-U1.s1 Mus musculus cDNA, 3 end (cds=U1-M-AKI-aez-f-12-0-U1) (clone_end=3) (gb=AI846299) (ig=5490205) (ug=Mm.43040) (len=335)                                                                |
| 92403_at             | 0.509094  | 4.92E-04 | 728     | Cluster lnc AB023836:Mus musculus 5T8G8NAc-Y mRNA for GDI alpha synthesis, complete cds (cds=193,1200) (gb=AB023836) (ig=6097862) (ug=Mm.40915) (len=1685)                                                                           |
| 104301_at            | 0.509094  | 4.92E-04 | 729     | Cluster lnc AI852414:U1-M-BHO-aip-a-01-0-U1.s1 Mus musculus cDNA, 3 end (cds=U1-M-BHO-aip-a-01-0-U1) (clone_end=3) (gb=AI852414) (ig=5468360) (ug=Mm.22351) (len=425)                                                                |
| 104512_at            | 0.509094  | 4.92E-04 | 730     | Cluster lnc AI957187:U1-M-BH2-2-aot-a-02-0-U1.s1 Mus musculus cDNA, 3 end (cds=U1-M-BH2-2-aot-a-02-0-U1) (clone_end=3) (gb=AI957187) (ig=5479896) (ug=Mm.3089) (len=483)                                                             |
| 97094_at             | 0.509094  | 4.92E-04 | 731     | Cluster lnc J03293:Phosphorylase kinase gamma (cds=57,1223) (gb=J03293) (ig=200338) (ug=Mm.3159) (len=2225)                                                                                                                          |
| 100094_f_at          | 0.509094  | 4.92E-04 | 732     | Cluster lnc AA2411784:AA2411784:Mus musculus cDNA, 5 end (cds=AA2411784) (clone_end=5) (gb=AA2411784) (ig=1872796) (ug=Mm.667) (len=240)                                                                                             |
| 93940_at             | 0.509094  | 4.92E-04 | 733     | Cluster lnc L76193:Paraoxonase 3 (cds=1054) (gb=L76193) (ig=1333339) (ug=Mm.9122) (len=1121)                                                                                                                                         |
| 92694_at             | 0.5063761 | 5.27E-04 | 734     | Cluster lnc M94584:Mus musculus secretory protein (YM-1) mRNA, complete cds (cds=12,1211) (gb=M94584) (ig=202441) (ug=Mm.4571) (len=1510)                                                                                            |
| 96285_at             | 0.5018215 | 5.92E-04 | 735     | Cluster lnc AJ224763:Mus musculus zinc finger gene OZF (cds=645,1523) (gb=AJ224763) (ig=4469276) (ug=Mm.42054) (len=1661)                                                                                                            |
| 102710_at            | 0.5018215 | 5.92E-04 | 736     | Cluster lnc AF020313:Mus musculus proline-rich protein 48 mRNA, partial cds (cds=0,895) (gb=AF020313) (ig=2624971) (ug=Mm.14255) (len=2223)                                                                                          |
| 101298_g_at          | 0.5018215 | 5.92E-04 | 737     | Cluster lnc I623158:Mouse leucocyte common antigen (L-CA) (cds=UNKNOW) (ig=I623158) (ig=19575) (ug=Mm.56925) (len=4032)                                                                                                              |
| 103815_at            | 0.5018215 | 5.92E-04 | 738     | Cluster lnc AJ012754:Mus musculus mRNA for glycylserine-associated amino acid transporter yLAT1a (cds=257,1789) (gb=AJ012754) (ig=3970790) (ug=Mm.20906) (len=2158)                                                                  |
| 100540_at            | 0.5018215 | 5.92E-04 | 739     | Cluster lnc M63848:Mouse leukotriene A-4 hydrolase mRNA, complete cds (cds=80,1915) (gb=M63848) (ig=198883) (ug=Mm.533) (len=2039)                                                                                                   |
| 99051_at             | 0.5018215 | 5.92E-04 | 740     | Cluster lnc I36579:S100 calcium-binding protein A4 (cds=0,164) (gb=I36579) (ig=199816) (ug=Mm.3925) (len=302)                                                                                                                        |
| 100397_at            | 0.5018215 | 5.92E-04 | 741     | Cluster lnc AF024637:TYRO protein tyrosine kinase binding protein (cds=0,344) (gb=AF024637) (ig=2906001) (ug=Mm.46301) (len=345)                                                                                                     |
| 96207_at             | 0.5018215 | 5.92E-04 | 742     | Cluster lnc AW046446:U1-M-BH1-ahv-a-11-0-U1.s1 Mus musculus cDNA, 3 end (cds=U1-M-BH1-ahv-a-11-0-U1) (clone_end=3) (gb=AW046446) (ig=5906978) (ug=Mm.28645) (len=373)                                                                |
| 94428_at             | 0.5018215 | 5.92E-04 | 743     | Cluster lnc AI842668:U1-M-AO1-aes-a-05-0-U1.s1 Mus musculus cDNA, 3 end (cds=U1-M-AO1-aes-a-05-0-U1) (clone_end=3) (gb=AI842668) (ig=5476881) (ug=Mm.2644) (len=378)                                                                 |
| 97226_at             | 0.5018215 | 5.92E-04 | 744     | Cluster lnc AW125649:U1-M-BH2-2-aq-b-03-0-U1.s1 Mus musculus cDNA, 3 end (cds=U1-M-BH2-2-aq-b-03-0-U1) (clone_end=3) (gb=AW125649) (ig=6101179) (ug=Mm.27773) (len=407)                                                              |
| 94473_at             | 0.5018215 | 5.92E-04 | 745     | Cluster lnc AI849067:U1-M-AH1-agw-d-0-0-U1.s1 Mus musculus cDNA, 3 end (cds=U1-M-AH1-agw-d-0-0-U1) (clone_end=3) (gb=AI849067) (ig=5492973) (ug=Mm.22485) (len=535)                                                                  |
| 102397_f_at          | 0.        |          |         |                                                                                                                                                                                                                                      |

## Supplemental DATA Table 1

Weisberg et al. Adipose tissue transcripts whose expression correlate with body mass

| Affymetrix Probe Set | ktau      | p-value  | klauder | Affymetrix Transcript Description                                                                                                                                                                                                         |
|----------------------|-----------|----------|---------|-------------------------------------------------------------------------------------------------------------------------------------------------------------------------------------------------------------------------------------------|
| 104714_at            | -0.501822 | 5.92E-04 | 761     | Cluster lnd AW125299.U1-M-BH2.1-apy-c-05-0-U1.s1 Mus musculus cDNA, 3 end /clone=U1-M-BH2.1-apy-c-05-0-U1 /clone_end=3 /gb=AW125299 /gi=6100829 /ug=Mm.24477 /len=374                                                                     |
| 167006_at            | -0.501822 | 5.92E-04 | 762     | Cluster lnd AW123347.U1-M-BH2.1-afp-d-09-0-U1.s1 Mus musculus cDNA, 3 end /clone=U1-M-BH2.1-afp-d-09-0-U1 /clone_end=3 /gb=AW123347 /gi=6088877 /gi=5491939 /ug=Mm.23932 /len=423 /NOTE=replacement for probe set(s) 104575_at on MG-U74A |
| 96812_at             | -0.501822 | 5.92E-04 | 763     | Cluster lnd AF089721.5moothered homolog (Drosophila) /cds=UNKOWNOWN /gb=AF089721 /gi=3608491 /ug=Mm.29279 /len=1073                                                                                                                       |
| 96527_at             | -0.501822 | 5.92E-04 | 764     | Cluster lnd AF05020.Musculus gamma for dodecyl-acyl CoA oxidase (Dco) /cds=UNKOWNOWN /gb=AF05020 /gi=46503 /ug=Mm.35833 /len=870                                                                                                          |
| 96712_at             | -0.501822 | 5.92E-04 | 765     | Cluster lnd AI848508.U1-M-AP1-afg-d-04-U1.s2 Mus musculus cDNA, 3 end /clone=U1-M-AP1-afg-d-04-U1 /clone_end=3 /gb=AI848508 /gi=5492414 /ug=Mm.27643 /len=426                                                                             |
| 102871_at            | -0.501822 | 5.92E-04 | 766     | Cluster lnd I77867.Mus musculus MEP mRNA, complete cds /cds=(202,3246) /gb=I77867 /gi=1191182 /ug=Mm.1480 /len=3464                                                                                                                       |
| 95611_at             | -0.501822 | 5.92E-04 | 767     | Cluster lnd AA726364.vu90e02.r1 Mus musculus cDNA, 5 end /clone=IMAGE-1209434 /clone_end=5 /gb=AA726364 /gi=2744071 /ug=Mm.27994 /len=374                                                                                                 |
| 102306_at            | -0.501822 | 5.92E-04 | 768     | Cluster lnd AF045852.Mus musculus tubby like protein 3 (Tub3) mRNA, complete cds /cds=(26,1408) /gb=AF045852 /gi=3327490 /ug=Mm.12887 /len=1508                                                                                           |
| 102979_f_at          | -0.501822 | 5.92E-04 | 769     | Cluster lnd M11988.Homo:bo.A6 /cds=(0,205) /gb=M11988 /gi=193900 /ug=Mm.57244 /len=294                                                                                                                                                    |
| 97086_f_at           | -0.501822 | 5.92E-04 | 770     | Cluster lnd M83348.Carcinoembryonic antigen 6 /cds=UNKOWNOWN /gb=M83348 /gi=200320 /ug=Mm.3132 /len=1919                                                                                                                                  |
| 97204_s_at           | -0.501822 | 5.92E-04 | 771     | Cluster lnd AI850983.U1-M-BHO-akd-h-08-0-U1.s1 Mus musculus cDNA, 3 end /clone=U1-M-BHO-akd-h-08-0-U1 /clone_end=3 /gb=AI850983 /gi=5494889 /ug=Mm.27692 /len=265                                                                         |
| 96936_at             | -0.501822 | 5.92E-04 | 772     | Cluster lnd AI848033.U1-M-AH1-afg-05-0-U1.s1 Mus musculus cDNA, 3 end /clone=U1-M-AH1-afg-05-0-U1 /clone_end=3 /gb=AI848033 /gi=5491939 /ug=Mm.43487 /len=257                                                                             |
| 100422_f_at          | -0.501822 | 5.92E-04 | 773     | Cluster lnd AJ237839.Mus musculus partial STAT5B gene, exon 6-9 /cds=(0,618) /gb=AJ237839 /gi=5698971 /ug=Mm.4691 /len=919                                                                                                                |
| 103391_at            | -0.501822 | 5.92E-04 | 774     | Cluster lnd AI888033.um10h12.x1 Mus musculus cDNA, 3 end /clone=IMAGE-2182727 /clone_end=3 /gb=AI888033 /gi=5819827 /ug=Mm.18654 /len=224                                                                                                 |
| 93040_at             | -0.501822 | 5.92E-04 | 775     | Cluster lnd AF091390.Mus musculus phospholemmann precursor, gene, complete cds /cds=(0,278) /gb=AF091390 /gi=4206710 /ug=Mm.1491 /len=279                                                                                                 |
| 97704_at             | -0.499091 | 6.34E-04 | 776     | Cluster lnd AA414990.vc50a01.r1 Mus musculus cDNA, 3 end /clone=IMAGE-777960 /clone_end=3 /gb=AA414990 /gi=2075117 /ug=Mm.3804 /len=431                                                                                                   |
| 101551_s_at          | 0.499091  | 6.34E-04 | 777     | Cluster lnd X78989.Mus musculus mRNA for testin /cds=(120,1226) /gb=X78989 /gi=475207 /ug=Mm.88645 /len=1377                                                                                                                              |
| 160470_at            | -0.499091 | 6.34E-04 | 778     | Cluster lnd AI840436.U1-M-ANO-aa-c-03-0-U1.s1 Mus musculus cDNA, 3 end /clone=U1-M-ANO-aa-c-03-0-U1 /clone_end=3 /gb=AI840436 /gi=5474649 /ug=Mm.41682 /len=395 /NOTE=replacement for probe set(s) 99165_at on MG-U74A                    |
| 93353_at             | 0.494587  | 7.10E-04 | 779     | Cluster lnd AF013262.Lumican /cds=(109,1125) /gb=AF013262 /gi=2654773 /ug=Mm.18888 /len=1782                                                                                                                                              |
| 93043_at             | 0.494587  | 7.10E-04 | 780     | Cluster lnd D50463.Mouse SDR1 mRNA, complete cds /cds=(27,872) /gb=D50463 /gi=1747303 /ug=Mm.15125 /len=1900                                                                                                                              |
| 96885_at             | 0.494587  | 7.10E-04 | 781     | Cluster lnd AW122271.U1-M-BH2.2-avv-h-12-0-U1.s1 Mus musculus cDNA, 3 end /clone=U1-M-BH2.2-avv-h-12-0-U1 /clone_end=3 /gb=AW122271 /gi=6097746 /ug=Mm.30083 /len=240                                                                     |
| 94448_at             | 0.494587  | 7.10E-04 | 782     | Cluster lnd AJ30289.Mus musculus mRNA for bcl-10 protein /cds=(78,779) /gb=AJ30289 /gi=4049471 /ug=Mm.28782 /len=1756                                                                                                                     |
| 100884_at            | 0.494587  | 7.10E-04 | 783     | Cluster lnd U04204.Fibroblast growth factor regulated protein /cds=(67,1017) /gb=U04204 /gi=463376 /ug=Mm.5378 /len=1304                                                                                                                  |
| 95542_at             | 0.494587  | 7.10E-04 | 784     | Cluster lnd AI835858.U1-M-AIO-aat-c-09-0-U1.s1 Mus musculus cDNA, 3 end /clone=U1-M-AIO-aat-c-09-0-U1 /clone_end=3 /gb=AI835858 /gi=5470071 /ug=Mm.27685 /len=469                                                                         |
| 160496_s_at          | 0.494587  | 7.10E-04 | 785     | Cluster lnd AA929330.vz40h12.r1 Mus musculus cDNA, 5 end /clone=IMAGE-1328999 /clone_end=5 /gb=AA929330 /gi=3078639 /ug=Mm.4502 /len=491 /NOTE=replacement for probe set(s) 100606_at on MG-U74A                                          |
| 96573_at             | 0.494587  | 7.10E-04 | 786     | Cluster lnd M21495.Mouse cytoskeletal gamma-actin mRNA, complete cds /cds=(28,1166) /gb=M21495 /gi=191656 /ug=Mm.29113 /len=1888                                                                                                          |
| 95032_at             | 0.494587  | 7.10E-04 | 787     | Cluster lnd AI846349.vw9d9t.r1 Mus musculus cDNA, 5 end /clone=IMAGE-1263130 /clone_end=5 /gb=AI846349 /gi=29444651 /ug=Mm.27529 /len=291                                                                                                 |
| 101160_at            | 0.494587  | 7.10E-04 | 788     | Cluster lnd X53798.Macrophage inflammatory protein 2 /cds=(46,348) /gb=X53798 /gi=55128 /ug=Mm.4979 /len=1083                                                                                                                             |
| 102719_f_at          | 0.494587  | 7.10E-04 | 789     | Cluster lnd X04151.Chemokine (C-C) receptor 5 /cds=(62,1126) /gb=X04151 /gi=1419628 /ug=Mm.14302 /len=1767                                                                                                                                |
| 93038_f_at           | 0.494587  | 7.10E-04 | 790     | Cluster lnd M69260.Lipocortin 1 /cds=(14,1054) /gb=M69260 /gi=198844 /ug=Mm.14860 /len=1340                                                                                                                                               |
| 104154_at            | 0.494587  | 7.10E-04 | 791     | Cluster lnd AB921961.Mus musculus mutant p53 mRNA, complete cds /cds=(100,1272) /gb=AB921961 /gi=5421849 /ug=Mm.222 /len=1429                                                                                                             |
| 97527_at             | 0.494587  | 7.10E-04 | 792     | Cluster lnd AA681998.v45a06.s1 Mus musculus cDNA, 5 end /clone=IMAGE-1123570 /clone_end=5 /gb=AA681998 /gi=2664138 /ug=Mm.326 /len=403                                                                                                    |
| 95332_at             | 0.494587  | 7.10E-04 | 793     | Cluster lnd AJ012488.Mus musculus gene encoding serotonin receptor 5-HT2B, exons 1-3 /cds=(850,2289) /gb=AJ012488 /gi=3850790 /ug=Mm.20464 /len=2607                                                                                      |
| 95612_at             | 0.494587  | 7.10E-04 | 794     | Cluster lnd AA667128.vq89a03.r1 Mus musculus cDNA, 5 end /clone=IMAGE-1109452 /clone_end=5 /gb=AA667128 /gi=2625829 /ug=Mm.27997 /len=108                                                                                                 |
| 102197_at            | 0.494587  | 7.10E-04 | 795     | Cluster lnd AJ222586.Mus musculus mRNA for NEFA protein, complete cds /cds=(287,1549) /gb=AJ222586 /gi=2612796 /ug=Mm.9901 /len=1655                                                                                                      |
| 97865_s_at           | 0.494587  | 7.10E-04 | 796     | Cluster lnd AW82582.um74d01.y1 Mus musculus cDNA, 5 end /clone=IMAGE-2309299 /clone_end=5 /gb=AW82582 /gi=6631823 /ug=Mm.28327 /len=321                                                                                                   |
| 92539_at             | 0.494587  | 7.10E-04 | 797     | Cluster lnd U80932.Serine/threonine kinase 6 /cds=(48,1235) /gb=U80932 /gi=1763646 /ug=Mm.11738 /len=1643                                                                                                                                 |
| 93356_at             | 0.494587  | 7.10E-04 | 798     | Cluster lnd D26091.Mus musculus mRNA for mCDC47, complete cds /cds=(106,2265) /gb=D26091 /gi=1136746 /ug=Mm.18923 /len=2396                                                                                                               |
| 97986_at             | 0.494587  | 7.10E-04 | 799     | Cluster lnd U91511.CD39 antigen-like 1 /cds=(66,464) /gb=U91511 /gi=2522325 /ug=Mm.31308 /len=1790                                                                                                                                        |
| 88915_at             | 0.494587  | 7.10E-04 | 800     | Cluster lnd AI840822.U1-M-AH1-afg-w-11-0-U1.s1 Mus musculus cDNA, 3 end /clone=U1-M-AH1-afg-w-11-0-U1 /clone_end=3 /gb=AI840822 /gi=5492988 /ug=Mm.28614 /len=494                                                                         |
| 101658_f_at          | 0.494587  | 7.10E-04 | 801     | Cluster lnd D01146.Mouse QSOX1 gene /cds=(0,554) /gb=D01146 /gi=202060 /ug=Mm.30423 /len=603                                                                                                                                              |
| 100879_at            | -0.494549 | 7.10E-04 | 802     | Cluster lnd AF093775.Mus musculus alpha-actinin 3 (Actn3) mRNA, complete cds /cds=(30,2732) /gb=AF093775 /gi=3694989 /ug=Mm.5316 /len=2855                                                                                                |
| 92225_f_at           | -0.494549 | 7.10E-04 | 803     | Cluster lnd U58280.Mus musculus second largest subunit of RNA polymerase 1 (RPA2) mRNA, complete cds /cds=(55,3462) /gb=U58280 /gi=1621593 /ug=Mm.34589 /len=3978                                                                         |
| 93216_at             | -0.494549 | 7.10E-04 | 804     | Cluster lnd AF069033.Mus musculus strain A/J basic fibroblast growth factor (Fgf2) mRNA, complete cds /cds=(0,464) /gb=AF069033 /gi=3158433 /ug=Mm.57094 /len=465                                                                         |
| 96773_at             | -0.494549 | 7.10E-04 | 805     | Cluster lnd X162425.Mouse MHC (Dn) C2a.5 gene for class I antigen /cds=(104,159) /gb=X162425 /gi=1621593 /ug=Mm.5715 /len=733                                                                                                             |
| 103697_at            | -0.494549 | 7.10E-04 | 806     | Cluster lnd AW061234.U1-M-BH1-afg-b-11-0-U1.s2 Mus musculus cDNA, 3 end /clone=U1-M-BH1-afg-b-11-0-U1 /clone_end=3 /gb=AW061234 /gi=6008985 /ug=Mm.24003 /len=462                                                                         |
| 98132_at             | -0.494549 | 7.10E-04 | 807     | Cluster lnd X01756.Cytochrome c, somatic /cds=(0,317) /gb=X01756 /gi=50618 /ug=Mm.36389 /len=318                                                                                                                                          |
| 102314_at            | -0.494549 | 7.10E-04 | 808     | Cluster lnd M23383.Solute carrier family 2 (facilitated glucose transporter), member 4 /cds=(153,1685) /gb=M23383 /gi=193706 /ug=Mm.10661 /len=2521                                                                                       |
| 99150_at             | -0.494549 | 7.10E-04 | 809     | Cluster lnd AI844357.U1-M-AL1-afg-w-10-0-U1.s1 Mus musculus cDNA, 3 end /clone=U1-M-AL1-afg-w-10-0-U1 /clone_end=3 /gb=AI844357 /gi=5488263 /ug=Mm.41541 /len=413                                                                         |
| 97523_at             | -0.494549 | 7.10E-04 | 810     | Cluster lnd U80959.Mus musculus chaperonin 10 mRNA, complete cds /cds=(78,386) /gb=U80959 /gi=469205 /ug=Mm.12070 /len=462                                                                                                                |
| 97353_at             | -0.494549 | 7.10E-04 | 811     | Cluster lnd AI837497.U1-M-ALD-abr-g-08-0-U1.s1 Mus musculus cDNA, 3 end /clone=U1-M-ALD-abr-g-08-0-U1 /clone_end=3 /gb=AI837497 /gi=5471710 /ug=Mm.29629 /len=224                                                                         |
| 161997_f_at          | -0.494549 | 7.10E-04 | 812     | Cluster lnd AV329607.AV329607.Mus musculus cDNA, 3 end /clone=IMAGE-6330504K16 /clone_end=3 /gb=AV329607 /gi=6369659 /ug=Mm.94504 /len=261 /NOTE=replacement for probe set(s) 99248_f_at on MG-U74A                                       |
| 98458_at             | -0.494549 | 7.10E-04 | 813     | Cluster lnd AI155192.ud83h03.r1 Mus musculus cDNA, 5 end /clone=IMAGE-1477493 /clone_end=5 /gb=AI155192 /gi=3683661 /ug=Mm.34757 /len=231                                                                                                 |
| 94076_at             | -0.494549 | 7.10E-04 | 814     | Cluster lnd AI84976.U1-M-AP1-afg-07-0-U1.s2 Mus musculus cDNA, 3 end /clone=U1-M-AP1-afg-07-0-U1 /clone_end=3 /gb=AI84976 /gi=5492382 /ug=Mm.29202 /len=304                                                                               |
| 93856_at             | -0.494549 | 7.10E-04 | 815     | Cluster lnd M55152.Wilms tumor homolog /cds=UNKOWNOWN /gi=2020413 /ug=Mm.87561 /len=3089                                                                                                                                                  |
| 98312_at             | -0.494549 | 7.10E-04 | 816     | Cluster lnd AB016768.Mus musculus mRNA for thrombospondin type 1 domain, complete cds /cds=(482,1279) /gb=AB016768 /gi=4519540 /ug=Mm.42202 /len=1834                                                                                     |
| 103311_at            | -0.494549 | 7.10E-04 | 817     | Cluster lnd AW121299.U1-M-BH2.3-afg-f-02-0-U1.s1 Mus musculus cDNA, 3 end /clone=U1-M-BH2.3-afg-f-02-0-U1 /clone_end=3 /gb=AW121299 /gi=6096632 /ug=Mm.21199 /len=236                                                                     |
| 101007_at            | -0.494549 | 7.10E-04 | 818     | Cluster lnd AI845732.U1-M-AD1-afg-b-04-0-U1.s1 Mus musculus cDNA, 3 end /clone=U1-M-AD1-afg-b-04-0-U1 /clone_end=3 /gb=AI845732 /gi=5489538 /ug=Mm.6797 /len=184                                                                          |
| 94906_at             | -0.494549 | 7.10E-04 | 819     | Cluster lnd AW125336.U1-M-BH2.1-afg-g-01-0-U1.s1 Mus musculus cDNA, 3 end /clone=U1-M-BH2.1-afg-g-01-0-U1 /clone_end=3 /gb=AW125336 /gi=6100866 /ug=Mm.22676 /len=253                                                                     |
| 101067_at            | -0.494549 | 7.10E-04 | 820     | Cluster lnd AW124711.U1-M-BH2.1-afg-a-12-0-U1.s1 Mus musculus cDNA, 3 end /clone=U1-M-BH2.1-afg-a-12-0-U1 /clone_end=3 /gb=AW124711 /gi=6100241 /ug=Mm.719 /len=467                                                                       |
| 93326_at             | -0.494549 | 7.10E-04 | 821     | Cluster lnd D26483.Mouse mRNA for PE31/TALLA, complete cds /cds=(5,739) /gb=D26483 /gi=685220 /ug=Mm.18590 /len=1720                                                                                                                      |
| 162234_f_at          | -0.494549 | 7.10E-04 | 822     | Cluster lnd AV139913.AV139913 Mus musculus cDNA /clone=2810055015 /clone_end=3 /gb=AV139913 /gi=5343908 /ug=Mm.82115 /len=289 /NOTE=replacement for probe set(s) 100242_f_at on MG-U74A                                                   |
| 98120_at             | -0.494549 | 7.10E-04 | 823     | Cluster lnd AI84607.U1-M-AH1-afg-b-03-0-U1.s1 Mus musculus cDNA, 3 end /clone=U1-M-AH1-afg-b-03-0-U1 /clone_end=3 /gb=AI84607 /gi=5488713 /ug=Mm.34951 /len=517                                                                           |
| 92537_a_at           | -0.494549 | 7.10E-04 | 824     | Cluster lnd XT2862.Adrenergic receptor, beta 3 /cds=(182,1384) /gb=XT2862 /gi=208112 /ug=Mm.4389 /len=2093                                                                                                                                |
| 93622_at             | 0.4918041 | 7.60E-04 | 825     | Cluster lnd M57626.Mast cell protease 6 /cds=(33,863) /gb=M57626 /gi=2005058 /ug=Mm.7409 /len=1108                                                                                                                                        |
| 98946_at             | 0.4872759 | 8.50E-04 | 826     | Cluster lnd AF033186.Mus musculus WSB-1 mRNA, complete cds /cds=(0,1265) /gb=AF033186 /gi=2766488 /ug=Mm.28719 /len=1266                                                                                                                  |
| 96154_at             | 0.4872759 | 8.50E-04 | 827     | Cluster lnd AA000645.vv77d04.r1 Mus musculus cDNA, 5 end /clone=IMAGE-1004239 /clone_end=5 /gb=AA000645 /gi=2434270 /ug=Mm.28280 /len=378                                                                                                 |
| 95908_at             | 0.4872759 | 8.50E-04 | 828     | Cluster lnd AI851255.U1-M-BHO-af-c-03-0-U1.s1 Mus musculus cDNA, 3 end /clone=U1-M-BHO-af-c-03-0-U1 /clone_end=3 /gb=AI851255 /gi=5495161 /ug=Mm.27986 /len=427                                                                           |
| 96033_at             | 0.4872759 | 8.50E-04 | 829     | Cluster lnd Z22532.Syndecan 1 /cds=(240,1175) /gb=Z22532 /gi=1946227 /ug=Mm.2580 /len=3054                                                                                                                                                |
| 97535_at             | 0.4872759 | 8.50E-04 | 830     | Cluster lnd D87661.Mus musculus mRNA for 14-3-3 eta, complete cds /cds=(184,924) /gb=D87661 /gi=1526540 /ug=Mm.3308 /len=1098                                                                                                             |
| 98975_at             | 0.4872759 | 8.50E-04 | 831     | Cluster lnd AI019999.uag95d0.r1 Mus musculus cDNA, 5 end /clone=IMAGE-1365280 /clone_end=5 /gb=AI019999 /gi=3234335 /ug=Mm.36725 /len=486                                                                                                 |
| 101928_at            | 0.4872759 | 8.50E-04 | 832     | Cluster lnd X87128.Mus musculus 75F TNF receptor DNA /cds=(67,133) /gb=X87128 /gi=8090943 /ug=Mm.2666 /len=133                                                                                                                            |
| 94330_at             | 0.4872759 | 8.50E-04 | 833     | Cluster lnd AA710564.v43b11.r1 Mus musculus cDNA, 5 end /clone=IMAGE-1165921 /clone_end=5 /gb=AA710564 /gi=2720482 /ug=Mm.24887 /len=519                                                                                                  |
| 102424_at            | 0.4872759 | 8.50E-04 | 834     | Cluster lnd J04491.Small inducible cytokine A3 /cds=(47,325) /gb=J04491 /gi=201524 /ug=Mm.1282 /len=735                                                                                                                                   |
| 95733_at             | 0.4872759 | 8.50E-04 | 835     | Cluster lnd AI838274.U1-M-AOO-aby-a-05-0-U1.s1 Mus musculus cDNA, 3 end /clone=U1-M-AOO-aby-a-05-0-U1 /clone_end=3 /gb=AI838274 /gi=5472487 /ug=Mm.29744 /len=324                                                                         |
| 96705_at             | 0.4872759 | 8.50E-04 | 836     | Cluster lnd AI839839.U1-M-AP0-af-a-09-0-U1.s2 Mus musculus cDNA, 3 end /clone=U1-M-AP0-af-a-09-0-U1 /clone_end=3 /gb=AI839839 /gi=5474052 /ug=Mm.27608 /len=281                                                                           |
| 160133_at            | 0.4872759 | 8.50E-04 | 837     | Cluster lnd AW260308.um76d02.y1 Mus musculus cDNA, 3 end /cds=(0,618) /gb=AW260308 /gi=5492382 /ug=Mm.21503 /len=569 /NOTE=replacement for probe set(s) 93816_at on MG-U74A                                                               |
| 102123_at            | 0.4872759 | 8.50E-04 | 838     | Cluster lnd Z121689.Mus musculus (C57 Black/6J) LAL mRNA for lysosomal acid lipase /cds=(16,1211) /gb=Z121689 /gi=4456670 /ug=Mm.42960 /len=2368                                                                                          |
| 102879_s_at          | 0.4872759 | 8.50E-04 | 839     | Cluster lnd M31314.Fc receptor, IgG, high affinity 1 /cds=(1,1215) /gb=M31314 /gi=200752 /ug=Mm.150 /len=1279                                                                                                                             |
| 94872_at             | 0.4872759 | 8.50E-04 | 840     | Cluster lnd Y08135.Mus musculus mRNA for ASM-like phosphodiesterase 3a /cds=(92,1429) /gb=Y08135 /gi=1652349 /ug=Mm.2379 /len=1788                                                                                                        |
| 1016793_at           | 0.4872759 | 8.50E-04 | 841     | Cluster lnd AI853315.U1-M-BHO-af-b-06-0-U1.s1 Mus musculus cDNA, 3 end /clone=U1-M-BHO-af-b-06-0-U1 /clone_end=3 /gb=AI853315 /gi=5497224 /ug=Mm.28793 /len=270 /NOTE=replacement for probe set(s) 96235_at on MG-U74A                    |
| 97813_at             | 0.4872759 | 8.50E-04 | 842     | Cluster lnd M61908.Avian reticuloheliosis viral (v-nc) oncogene homolog A /cds=(60,1709) /gb=M61909 /gi=200025 /ug=Mm.28170 /len=2424                                                                                                     |
| 101956_at            | 0.4872759 | 8.50E-04 | 843     | Cluster lnd AI834849.U1-M-ANO-acm-d-08-0-U1.s1 Mus musculus cDNA, 3 end /clone=U1-M-ANO-acm-d-08-0-U1 /clone_end=3 /gb=AI834849 /gi=5469062 /ug=Mm.9210 /len=176                                                                          |
| 93974_at             | 0.4872759 | 8.50E-04 | 844     | Cluster lnd AW121475.uo89c05.x1 Mus musculus cDNA, 3 end /clone=IMAGE-2649704 /clone_end=3 /gb=AW121475 /gi=6518562 /ug=Mm.21679 /len=230                                                                                                 |
| 94085_at             | 0.4872759 | 8.50E-04 | 845     | Cluster lnd M34602.Mouse proteoglycan core protein mRNA, complete cds /cds=(42,500) /gb=M34602 /gi=200516 /ug=Mm.22194 /len=912                                                                                                           |
| 100074_f_at          | 0.4872759 |          |         |                                                                                                                                                                                                                                           |

## Supplemental DATA Table 1

Weisberg et al. Adipose tissue transcripts whose expression correlate with body mass

| Affymetrix Probe Set | ktau      | p-value  | klauorder | Affymetrix Transcript Description                                                                                                                                                                                        |
|----------------------|-----------|----------|-----------|--------------------------------------------------------------------------------------------------------------------------------------------------------------------------------------------------------------------------|
| 96097_at             | 0.4872759 | 8.50E-04 | 856       | Cluster lnc AI847973.UJ-M-A11-afh-05-0-UJ.s1 Mus musculus cDNA, 3 end /clone=UJ-M-A11-afh-05-0-UJ /clone_end=3 /gb=AI847973 /lg=5491879 /ug=Mm.26773 /len=457                                                            |
| 93921_at             | 0.4872759 | 8.50E-04 | 857       | Cluster lnc AI573601.ud46a12.y1 Mus musculus cDNA, 5 end /clone=IMAGE-1448926 /clone_end=5 /gb=AI573601 /lg=54536975 /ug=Mm.89855 /len=535                                                                               |
| 103614_at            | 0.4872759 | 8.50E-04 | 858       | Cluster lnc AW047899.UJ-M-BH1-ain-a-06-0-UJ.s1 Mus musculus cDNA, 3 end /clone=UJ-M-BH1-ain-a-06-0-UJ /clone_end=3 /gb=AW047899 /lg=5908428 /ug=Mm.20225 /len=403                                                        |
| 99378_f_at           | 0.4872759 | 8.50E-04 | 859       | Cluster lnc AI68377.Mouse MHC class I 04 beta-2-microglobulin (Cl-2) gene, 3 end /clone=AI68377 /lg=590323 /ug=Mm.5026 /len=981                                                                                          |
| 161583_at            | 0.487276  | 8.50E-04 | 860       | Cluster lnc AV317327.AV317327 Mus musculus cDNA, 3 end /clone=AV317327 /lg=6282744 /ug=Mm.67842 /len=238 /NOTE=replacement for probe set(s) 96438_at on MG-U74A                                                          |
| 93456_r_at           | 0.487276  | 8.50E-04 | 861       | Cluster lnc L47480.Mus musculus BMP-4 gene, complete cds /cds=(92,1354) /gb=L47480 /lg=994733 /ug=Mm.6813 /len=1654                                                                                                      |
| 104011_at            | 0.487276  | 8.50E-04 | 862       | Cluster lnc AB017482.Mus musculus mRNA for retinal oxidase/aldehyde oxidase, complete cds /cds=(114,115) /gb=AB017482 /lg=14126959 /ug=Mm.26787 /len=4448                                                                |
| 104177_at            | 0.487276  | 8.50E-04 | 863       | Cluster lnc AA224579.mf84011.r1 Mus musculus cDNA, 5 end /clone=IMAGE-636597 /clone_end=5 /gb=AA224579 /lg=18011172 /ug=Mm.27276 /len=360                                                                                |
| 103551_at            | 0.487276  | 8.50E-04 | 864       | Cluster lnc AW124208.UJ-M-BH2 1-aph-03-0-UJ.s1 Mus musculus cDNA, 3 end /clone=UJ-M-BH2 1-aph-03-0-UJ /clone_end=3 /gb=AW124208 /lg=609238 /ug=Mm.23813 /len=384                                                         |
| 97188_at             | 0.487276  | 8.50E-04 | 865       | Cluster lnc AW121686.UJ-M-BH2-3-acc-e-10-0-UJ.s1 Mus musculus cDNA, 3 end /clone=UJ-M-BH2-3-acc-e-10-0-UJ /clone_end=3 /gb=AW121686 /lg=6097019 /ug=Mm.3639 /len=485                                                     |
| 96292_r_at           | 0.487276  | 8.50E-04 | 866       | Cluster lnc AI835847.UJ-M-A10-aat-b-07-0-UJ.s1 Mus musculus cDNA, 3 end /clone=UJ-M-A10-aat-b-07-0-UJ /clone_end=3 /gb=AI835847 /lg=5470060 /ug=Mm.29897 /len=333                                                        |
| 96746_at             | 0.487276  | 8.50E-04 | 867       | Cluster lnc AW124813.UJ-M-BH2 1-akp-c-01-0-UJ.s1 Mus musculus cDNA, 3 end /clone=UJ-M-BH2 1-akp-c-01-0-UJ /clone_end=3 /gb=AW124813 /lg=6100343 /ug=Mm.28953 /len=435                                                    |
| 96222_at             | 0.487276  | 8.50E-04 | 868       | Cluster lnc AI035777.ud5396.r1 Mus musculus cDNA, 5 end /clone=IMAGE-1391498 /clone_end=5 /gb=AI035777 /lg=3261288 /ug=Mm.26717 /len=485                                                                                 |
| 98965_at             | 0.487276  | 8.50E-04 | 869       | Cluster lnc AC002397.Mouse chromosome 6 BAC-28AH12 (Research Genetics mouse BAC library) complete sequence /cds=(1,1323) /gb=AC002397 /lg=3287367 /ug=Mm.3634 /len=1741                                                  |
| 104417_at            | 0.487276  | 8.50E-04 | 870       | Cluster lnc AW048779.UJ-M-BH1-amp-b-01-0-UJ.s1 Mus musculus cDNA, 3 end /clone=UJ-M-BH1-amp-b-01-0-UJ /clone_end=3 /gb=AW048779 /lg=5909308 /ug=Mm.28915 /len=380                                                        |
| 160400_at            | 0.487276  | 8.50E-04 | 871       | Cluster lnc AI853616.UJ-M-BHO-ajp-f-10-0-UJ.s1 Mus musculus cDNA, 3 end /clone=UJ-M-BHO-ajp-f-10-0-UJ /clone_end=3 /gb=AI853616 /lg=5497522 /ug=Mm.30256 /len=513 /NOTE=replacement for probe set(s) 97455_at on MG-U74A |
| 94358_at             | 0.487276  | 8.50E-04 | 872       | Cluster lnc U11505.Mus musculus mRNA for Mgp90 protein /cds=(103,363) /gb=U11505 /lg=2344863 /ug=Mm.26246 /len=515                                                                                                       |
| 160652_at            | 0.487276  | 8.50E-04 | 873       | Cluster lnc AI849022.UJ-M-AM0-adj-q-02-0-UJ.s1 Mus musculus cDNA, 3 end /clone=UJ-M-AM0-adj-q-02-0-UJ /clone_end=3 /gb=AI849022 /lg=5475135 /ug=Mm.3871 /len=403 /NOTE=replacement for probe set(s) 99022_at on MG-U74A  |
| 96110_at             | 0.487276  | 8.50E-04 | 874       | Cluster lnc U31966.Carbonyl reductase /cds=(128,961) /gb=U31966 /lg=1049107 /ug=Mm.26940 /len=1053                                                                                                                       |
| 94545_at             | 0.487276  | 8.50E-04 | 875       | Cluster lnc AW123115.UJ-M-BH2 1-acc-f-12-0-UJ.s1 Mus musculus cDNA, 3 end /clone=UJ-M-BH2 1-acc-f-12-0-UJ /clone_end=3 /gb=AW123115 /lg=6098645 /ug=Mm.29075 /len=307                                                    |
| 97250_at             | 0.487276  | 8.50E-04 | 876       | Cluster lnc AW049326.UJ-M-BH1-amm-f-01-0-UJ.s1 Mus musculus cDNA, 3 end /clone=UJ-M-BH1-amm-f-01-0-UJ /clone_end=3 /gb=AW049326 /lg=5909855 /ug=Mm.27858 /len=234                                                        |
| 92185_at             | 0.487276  | 8.50E-04 | 877       | Cluster lnc AI851599.UJ-M-BHO-aiu-a-02-0-UJ.s1 Mus musculus cDNA, 3 end /clone=UJ-M-BHO-aiu-a-02-0-UJ /clone_end=3 /gb=AI851599 /lg=5495505 /ug=Mm.33796 /len=352                                                        |
| 93530_at             | 0.487276  | 8.50E-04 | 878       | Cluster lnc AI118854.uc1405.r1 Mus musculus cDNA, 5 end /clone=IMAGE-1397685 /clone_end=5 /gb=AI118854 /lg=3519178 /ug=Mm.2000 /len=281                                                                                  |
| 161770_f_at          | 0.484518  | 9.10E-04 | 879       | Cluster lnc AV341577.AV341577 Mus musculus cDNA, 3 end /clone=643052813 /clone_end=3 /gb=AV341577 /lg=6381629 /ug=Mm.90622 /len=246 /NOTE=replacement for probe set(s) 98179_f_at on MG-U74A                             |
| 93168_at             | 0.484518  | 9.10E-04 | 880       | Cluster lnc AI852629.UJ-M-BHO-aiu-f-07-0-UJ.s1 Mus musculus cDNA, 3 end /clone=UJ-M-BHO-aiu-f-07-0-UJ /clone_end=3 /gb=AI852629 /lg=5496535 /ug=Mm.5337 /len=406                                                         |
| 96986_at             | 0.484518  | 9.10E-04 | 881       | Cluster lnc U32684.Paraoxonase 1 /cds=(79,1146) /gb=U32684 /lg=127235 /ug=Mm.30107 /len=1381                                                                                                                             |
| 101942_at            | 0.484518  | 9.10E-04 | 882       | Cluster lnc X05212.Mouse mRNA for lamin B1 C-terminus /cds=(0,1489) /gb=X05212 /lg=52861 /ug=Mm.963 /len=1640                                                                                                            |
| AFXX-MurIL4.t        | 0.484518  | 9.10E-04 | 883       | M25892.Mus musculus interleukin 4 (IL-4) mRNA, complete cds                                                                                                                                                              |
| 98114_at             | 0.480032  | 1.02E-03 | 884       | Cluster lnc AF003348.Niemann Pick type C1 /cds=(123,3959) /gb=AF003348 /lg=225124 /ug=Mm.3484 /len=5029                                                                                                                  |
| 97243_at             | 0.480032  | 1.02E-03 | 885       | Cluster lnc U74079.Mus musculus protein co-factor mRNA, complete cds /cds=(137,1204) /gb=U74079 /lg=1644403 /ug=Mm.27842 /len=1901                                                                                       |
| 95598_at             | 0.480032  | 1.02E-03 | 886       | Cluster lnc AF89751.Mus musculus ATP receptor P2Y4 subunit mRNA, complete cds /cds=(1,1197) /gb=AF89751 /lg=4019303 /ug=Mm.27861 /len=1844                                                                               |
| 100088_at            | 0.480032  | 1.02E-03 | 887       | Cluster lnc AA796890.vp15a2.r1 Mus musculus cDNA, 5 end /clone=IMAGE-1068907 /clone_end=5 /gb=AA796890 /lg=2859645 /ug=Mm.6807 /len=403                                                                                  |
| 93609_at             | 0.480032  | 1.02E-03 | 888       | Cluster lnc AA797709.vw31c03.r1 Mus musculus cDNA, 5 end /clone=IMAGE-1245412 /clone_end=5 /gb=AA797709 /lg=2860664 /ug=Mm.7265 /len=464                                                                                 |
| 103946_at            | 0.480032  | 1.02E-03 | 889       | Cluster lnc U87814.Mus musculus PEST phosphatase interacting protein mRNA, complete cds /cds=(273,1520) /gb=U87814 /lg=1857711 /ug=Mm.2534 /len=1692                                                                     |
| 102312_at            | 0.480032  | 1.02E-03 | 890       | Cluster lnc AI314784.us3508.x1 Mus musculus cDNA, 3 end /clone=IMAGE-1921934 /clone_end=3 /gb=AI314784 /lg=4030051 /ug=Mm.19726 /len=494                                                                                 |
| 94363_at             | 0.480032  | 1.02E-03 | 891       | Cluster lnc D50586.Tissue factor pathway inhibitor 2 /cds=(35,727) /gb=D50586 /lg=2467366 /ug=Mm.25612 /len=1522                                                                                                         |
| 101101_at            | 0.480032  | 1.02E-03 | 892       | Cluster lnc Z67746.Mus musculus mRNA for phosphatase 2A catalytic subunit, isotype beta /cds=(0,929) /gb=Z67746 /lg=1246796 /ug=Mm.7418 /len=930                                                                         |
| 99191_at             | 0.480032  | 1.02E-03 | 893       | Cluster lnc AW04939.UJ-M-BG0-ahv-q-09-0-UJ.s1 Mus musculus cDNA, 3 end /clone=UJ-M-BG0-ahv-q-09-0-UJ /clone_end=3 /gb=AW04939 /lg=5488845 /ug=Mm.41906 /len=413                                                          |
| 103248_at            | 0.480032  | 1.02E-03 | 894       | Cluster lnc AW049684.UJ-M-BH1-ani-b-12-0-UJ.s1 Mus musculus cDNA, 3 end /clone=UJ-M-BH1-ani-b-12-0-UJ /clone_end=3 /gb=AW049684 /lg=5910213 /ug=Mm.19000 /len=346                                                        |
| 98991_at             | 0.480032  | 1.02E-03 | 895       | Cluster lnc AW011716.u8911.x1 Mus musculus cDNA, 3 end /clone=IMAGE-2159277 /clone_end=3 /gb=AW011716 /lg=5606094 /ug=Mm.28544 /len=459                                                                                  |
| 100960_at            | 0.480032  | 1.02E-03 | 896       | Cluster lnc AI83033.Protein tyrosine phosphatase, receptor type A /cds=(26,2614) /gb=AI83033 /lg=198974 /ug=Mm.587 /len=3070                                                                                             |
| 95613_at             | 0.480032  | 1.02E-03 | 897       | Cluster lnc AW122573.UJ-M-BH2 2-aox-f-07-0-UJ.s1 Mus musculus cDNA, 3 end /clone=UJ-M-BH2 2-aox-f-07-0-UJ /clone_end=3 /gb=AW122573 /lg=6098098 /ug=Mm.28001 /len=448                                                    |
| 96036_at             | 0.480032  | 1.02E-03 | 898       | Cluster lnc AW870525.vq2260.r1 Mus musculus cDNA, 5 end /clone=IMAGE-1095034 /clone_end=5 /gb=AW870525 /lg=2965970 /ug=Mm.33890 /len=608                                                                                 |
| 98116_at             | 0.480032  | 1.02E-03 | 899       | Cluster lnc U89889.Mus musculus hemopexin mRNA, partial cds /cds=(0,1361) /gb=U89889 /lg=1881767 /ug=Mm.3485 /len=1430                                                                                                   |
| 95102_at             | 0.480032  | 1.02E-03 | 900       | Cluster lnc AW123754.UJ-M-BH2 1-aps-a-06-0-UJ.s1 Mus musculus cDNA, 3 end /clone=UJ-M-BH2 1-aps-a-06-0-UJ /clone_end=3 /gb=AW123754 /lg=6099284 /ug=Mm.29345 /len=395                                                    |
| 95514_at             | 0.480032  | 1.02E-03 | 901       | Cluster lnc AI846302.UJ-M-AK1-azg-q-04-UJ.s1 Mus musculus cDNA, 3 end /clone=UJ-M-AK1-azg-q-04-UJ /clone_end=3 /gb=AI846302 /lg=5490208 /ug=Mm.253 /len=324                                                              |
| 102858_at            | 0.480032  | 1.02E-03 | 902       | Cluster lnc L02241.Mouse protein kinase inhibitor (testicular isoform) mRNA, complete cds /cds=(464,742) /gb=L02241 /lg=200496 /ug=Mm.1499 /len=1465                                                                     |
| 94850_at             | 0.480032  | 1.02E-03 | 903       | Cluster lnc AJ238894.Mus musculus mRNA for mitochondrial acyl-CoA thioesterase, clone 2 /cds=(97,1416) /gb=AJ238894 /lg=102775 /ug=Mm.23388 /len=1557                                                                    |
| 160848_at            | 0.480032  | 1.02E-03 | 904       | Cluster lnc AW214617.uc050608.x1 Mus musculus cDNA, 3 end /clone=IMAGE-2645990 /clone_end=3 /gb=AW214617 /lg=6521176 /ug=Mm.3626 /len=526 /NOTE=replacement for probe set(s) 98964_at on MG-U74A                         |
| 160340_at            | 0.480032  | 1.02E-03 | 905       | Cluster lnc AI849849.UJ-M-BH0-abi-b-08-0-UJ.s1 Mus musculus cDNA, 3 end /clone=UJ-M-BH0-abi-b-08-0-UJ /clone_end=3 /gb=AI849849 /lg=5498745 /ug=Mm.29646 /len=637 /NOTE=replacement for probe set(s) 96987_at on MG-U74A |
| 160801_at            | 0.480032  | 1.02E-03 | 906       | Cluster lnc AW061073.UJ-M-BH1-amp-b-03-0-UJ.s1 Mus musculus cDNA, 3 end /clone=UJ-M-BH1-amp-b-03-0-UJ /clone_end=3 /gb=AW061073 /lg=6008824 /ug=Mm.29247 /len=464 /NOTE=replacement for probe set(s) 96800_at on MG-U74A |
| 104433_at            | 0.480032  | 1.02E-03 | 907       | Cluster lnc AI849882.UJ-M-AL1-ahf-f-01-0-UJ.s1 Mus musculus cDNA, 3 end /clone=UJ-M-AL1-ahf-f-01-0-UJ /clone_end=3 /gb=AI849882 /lg=5493558 /ug=Mm.29228 /len=245                                                        |
| 96989_at             | 0.480032  | 1.02E-03 | 908       | Cluster lnc AW124839.UJ-M-BH2 1-akp-f-02-0-UJ.s1 Mus musculus cDNA, 3 end /clone=UJ-M-BH2 1-akp-f-02-0-UJ /clone_end=3 /gb=AW124839 /lg=6100369 /ug=Mm.30064 /len=465                                                    |
| 94322_at             | 0.480032  | 1.02E-03 | 909       | Cluster lnc U32391.PFTAB1 protein kinase 1 /cds=(118,1389) /gb=U32391 /lg=2302813 /ug=Mm.31031 /len=1839                                                                                                                 |
| 90986_at             | 0.480032  | 1.02E-03 | 910       | Cluster lnc AF007550.Mus musculus golgi SNARE (GS27) mRNA, complete cds /cds=(0,638) /gb=AF007550 /lg=21326091 /ug=Mm.44615 /len=639                                                                                     |
| 99135_at             | 0.480032  | 1.02E-03 | 911       | Cluster lnc U43076.Mus musculus cdc37 homolog mRNA, complete cds /cds=(87,1226) /gb=U43076 /lg=1375486 /ug=Mm.4117 /len=1607                                                                                             |
| 101088_f_at          | 0.480032  | 1.02E-03 | 912       | Cluster lnc U20326.Mus musculus cellular nucleic acid binding protein mRNA, complete cds /cds=(110,655) /gb=U20326 /lg=854674 /ug=Mm.7335 /len=1519                                                                      |
| 98910_at             | 0.480032  | 1.02E-03 | 913       | Cluster lnc AI846118.UJ-M-AK1-aeew-e-07-UJ.s1 Mus musculus cDNA, 3 end /clone=UJ-M-AK1-aeew-e-07-UJ /clone_end=3 /gb=AI846118 /lg=5486989 /ug=Mm.28594 /len=234                                                          |
| 94400_at             | 0.480032  | 1.02E-03 | 914       | Cluster lnc AI843094.UJ-M-AK1-aez-e-08-0-UJ.s1 Mus musculus cDNA, 3 end /clone=UJ-M-AK1-aez-e-08-0-UJ /clone_end=3 /gb=AI843094 /lg=5477307 /ug=Mm.25783 /len=349                                                        |
| 101027_s_at          | 0.480003  | 1.02E-03 | 915       | Cluster lnc AF069051.Mus musculus pituitary tumor transforming gene protein (PTTG) mRNA, complete cds /cds=(303,893) /gb=AF069051 /lg=3702843 /ug=Mm.6856 /len=945                                                       |
| 104065_at            | 0.480003  | 1.02E-03 | 916       | Cluster lnc AW047554.UJ-M-BH1-ama-g-03-0-UJ.s1 Mus musculus cDNA, 3 end /clone=UJ-M-BH1-ama-g-03-0-UJ /clone_end=3 /gb=AW047554 /lg=5908083 /ug=Mm.24126 /len=312                                                        |
| 95910_f_at           | 0.480003  | 1.02E-03 | 917       | Cluster lnc AI844780.UJ-M-AL1-ahq-q-08-0-UJ.s1 Mus musculus cDNA, 3 end /clone=UJ-M-AL1-ahq-q-08-0-UJ /clone_end=3 /gb=AI844780 /lg=5486866 /ug=Mm.24440 /len=200                                                        |
| 98109_at             | 0.480003  | 1.02E-03 | 918       | Cluster lnc AI839528.UJ-M-AN0-act-a-06-0-UJ.s1 Mus musculus cDNA, 3 end /clone=UJ-M-AN0-act-a-06-0-UJ /clone_end=3 /gb=AI839528 /lg=5473741 /ug=Mm.34001 /len=355                                                        |
| 160226_at            | 0.480003  | 1.02E-03 | 919       | Cluster lnc AW046879.UJ-M-BH1-aki-c-05-0-UJ.s1 Mus musculus cDNA, 3 end /clone=UJ-M-BH1-aki-c-05-0-UJ /clone_end=3 /gb=AW046879 /lg=5907408 /ug=Mm.27289 /len=365 /NOTE=replacement for probe set(s) 96642_at on MG-U74A |
| 95968_at             | 0.480003  | 1.02E-03 | 920       | Cluster lnc AI851810.UJ-M-BHO-ase-c-02-0-UJ.s1 Mus musculus cDNA, 3 end /clone=UJ-M-BHO-ase-c-02-0-UJ /clone_end=3 /gb=AI851810 /lg=5495716 /ug=Mm.29683 /len=276                                                        |
| 101909_f_at          | 0.480003  | 1.02E-03 | 921       | Cluster lnc M16357.Mouse major urinary protein III (MUP III) mRNA, partial cds /cds=(0,147) /gb=M16357 /lg=199862 /ug=Mm.89867 /len=419                                                                                  |
| 102207_at            | 0.480003  | 1.02E-03 | 922       | Cluster lnc AW123249.UJ-M-BH2 1-agg-a-04-0-UJ.s1 Mus musculus cDNA, 3 end /clone=UJ-M-BH2 1-agg-a-04-0-UJ /clone_end=3 /gb=AW123249 /lg=6098744 /ug=Mm.100253 /len=347                                                   |
| 160896_at            | 0.480003  | 1.02E-03 | 923       | Cluster lnc AB021860.Mus musculus mRNA for TBP binding protein ABT1, complete cds /cds=(33,842) /gb=AB021860 /lg=6518526 /ug=Mm.501 /len=1302 /NOTE=replacement for probe set(s) 100480_at on MG-U74A                    |
| 102910_at            | 0.480003  | 1.02E-03 | 924       | Cluster lnc M24417.P glycoprotein 3 /cds=(0,3316) /gb=M24417 /lg=2003329 /ug=Mm.16088 /len=3682                                                                                                                          |
| 98904_at             | 0.480003  | 1.02E-03 | 925       | Cluster lnc AW061339.UJ-M-BH1-anw-g-01-0-UJ.s1 Mus musculus cDNA, 3 end /clone=UJ-M-BH1-anw-g-01-0-UJ /clone_end=3 /gb=AW061339 /lg=6000990 /ug=Mm.28579 /len=376                                                        |
| 96528_at             | 0.480003  | 1.02E-03 | 926       | Cluster lnc D18912.Mus musculus USO51097 Mus musculus cDNA, 3 end /clone=IMAGE-90837 /clone_end=3 /gb=D18912 /lg=1089548 /ug=Mm.20708 /len=254                                                                           |
| 94338_s_at           | 0.480003  | 1.02E-03 | 927       | Cluster lnc M15828.Growth arrest specific 2 /cds=(243,1187) /gb=M15828 /lg=9487 /ug=Mm.25 /len=2139                                                                                                                      |
| 95030_at             | 0.480003  | 1.02E-03 | 928       | Cluster lnc D10214.Prolactin receptor /cds=(23,1849) /gb=D10214 /lg=220575 /ug=Mm.2752 /len=1881                                                                                                                         |
| 93780_at             | 0.480003  | 1.02E-03 | 929       | Cluster lnc AW060827.UJ-M-BH1-arn-b-12-0-UJ.s1 Mus musculus cDNA, 3 end /clone=UJ-M-BH1-arn-b-12-0-UJ /clone_end=3 /gb=AW060827 /lg=6008578 /ug=Mm.2125 /len=567                                                         |
| 101748_at            | 0.480003  | 1.02E-03 | 930       | Cluster lnc U47281.Mus musculus bradykinin B1 subtype receptor gene, complete cds /cds=(0,1004) /gb=U47281 /lg=1255048 /ug=Mm.50706 /len=1005                                                                            |
| 93015_at             | 0.480003  | 1.02E-03 | 931       | Cluster lnc X65021.Glutathione-S-transferase, alpha 3 /cds=(12,777) /gb=X65021 /lg=1086 /ug=Mm.14719 /len=922                                                                                                            |
| 106123_f_at          | 0.480003  | 1.02E-03 | 932       | Cluster lnc AV37147.AV37147 Mus musculus cDNA, 3 end /clone=IMAGE-1300223 /clone_end=3 /gb=AV37147 /lg=6422794 /ug=Mm.9816 /len=250 /NOTE=replacement for probe set(s) 99759_f_at on MG-U74A                             |
| 96611_at             | 0.480003  | 1.02E-03 | 933       | Cluster lnc AI843074.UJ-M-AK1-aea-a-11-0-UJ.s1 Mus musculus cDNA, 3 end /clone=UJ-M-AK1-aea-a-11-0-UJ /clone_end=3 /gb=AI843074 /lg=5477287 /ug=Mm.27087 /len=253                                                        |
| 108077_at            | 0.480003  | 1.02E-03 | 934       | Cluster lnc AA647799.vp04e11.r1 Mus musculus cDNA, 5 end /clone=IMAGE-1067660 /clone_end=5 /gb=AA647799 /lg=2574228 /ug=Mm.4258 /len=500 /NOTE=replacement for probe set(s) 99550_at on MG-U74A                          |
| 95377_at             | 0.480003  | 1.02E-03 | 935       | Cluster lnc AI843731.vi09e003.x1 Mus musculus cDNA, 3 end /clone=IMAGE-903292 /clone_end=3 /gb=AI843731 /lg=4722206 /ug=Mm.22896 /len=387                                                                                |
| 92487_at             | 0.480003  | 1.02E-03 | 936       | Cluster lnc AB023419.Mus musculus mRNA for NusA3, complete cds /cds=(90,1192) /gb=AB023419 /lg=103026 /ug=Mm.42162 /len=326                                                                                              |
| 96670_at             | 0.480003  | 1.02E-03 | 937       | Cluster lnc AI81295.UJ-M-AM0-adj-q-05-0-UJ.s1 Mus musculus cDNA, 3 end /clone=UJ-M-AM0-adj-q-05-0-UJ /clone_end=3 /gb=AI81295 /lg=5475508 /ug=Mm.27395 /len=441                                                          |
| 92232_at             | 0.477231  | 1.09E-03 | 938       | Cluster lnc U88328.Mus musculus suppressor of cytokine signalling-3 (SOCS                                                                                                                                                |

## Supplemental DATA Table 1

Weisberg et al. Adipose tissue transcripts whose expression correlate with body mass

| Affymetrix Probe Set | ktau      | p-value  | klauder | Affymetrix Transcript Description                                                                                                                                                                                           |
|----------------------|-----------|----------|---------|-----------------------------------------------------------------------------------------------------------------------------------------------------------------------------------------------------------------------------|
| 97530_at             | 0.4727304 | 1.21E-03 | 951     | Cluster lnc U82627:Mus musculus ubiquitin-conjugating enzyme mE2 mRNA, complete cds (cds=105,581) (gb=U82627) (gi=1857450) (lug=Mm.3268) (len=769)                                                                          |
| 96260_at             | 0.4727304 | 1.21E-03 | 952     | Cluster lnc AB021491:Mus musculus mRNA for p100 co-activator, complete cds (cds=249,2897) (gb=AB021491) (gi=6009520) (lug=Mm.28827) (len=3428)                                                                              |
| 103578_at            | 0.4727304 | 1.21E-03 | 953     | Cluster lnc AJ006972:Mus musculus mRNA for TOM1 protein, complete cds (cds=67,1545) (gb=AJ006972) (gi=531987) (lug=Mm.1967) (len=2253)                                                                                      |
| 102341_at            | 0.4727304 | 1.21E-03 | 954     | Cluster lnc U46241:Mus musculus alpha-D-glucosylidase mRNA, complete cds (cds=10,1259) (gb=U46241) (gi=945408) (lug=Mm.1114) (len=1260)                                                                                     |
| 161968_f_at          | 0.4727304 | 1.21E-03 | 955     | Cluster lnc AV37035:AV37035 Mus musculus cDNA, 3' end (clone=AV37035) (cds=4417682) (lug=Mm.93814) (len=251) (NOTE:replacement for probe set(s) 99214_at on MG-U74A)                                                        |
| 98928_at             | 0.4727304 | 1.21E-03 | 956     | Cluster lnc AW122820:U1-M-BH2.1-acc-b-12-0-U1.s1 Mus musculus cDNA, 3' end (clone=U1-M-BH2.1-acc-b-12-0-U1) (cds=) (gb=AW122820) (gi=6098350) (lug=Mm.28652) (len=302)                                                      |
| 161856_f_at          | 0.4727304 | 1.21E-03 | 957     | Cluster lnc AV059786:Mus musculus cDNA (clone=1810600C9) (cds=) (gb=AV059786) (gi=5159513) (lug=Mm.75340) (len=189) (NOTE:replacement for probe set(s) 98640_f_at on MG-U74A)                                               |
| 103955_at            | 0.4727304 | 1.21E-03 | 958     | Cluster lnc AW050325:U1-M-BH1-ang-b-04-U1.s1 Mus musculus cDNA, 3' end (clone=U1-M-BH1-ang-b-04-U1) (cds=) (gb=AW050325) (gi=5910854) (lug=Mm.25539) (len=488)                                                              |
| 162095_f_at          | 0.4727304 | 1.21E-03 | 959     | Cluster lnc AV341518:AV341518 Mus musculus cDNA, 3' end (clone=AV341518) (cds=6301570) (lug=Mm.96307) (len=245) (NOTE:replacement for probe set(s) 99277_f_at on MG-U74A)                                                   |
| 160780_at            | 0.4727304 | 1.21E-03 | 960     | Cluster lnc AW120525:U1-M-BH1-ana-b-08-U1.s2 Mus musculus cDNA, 3' end (clone=U1-M-BH1-ana-b-08-U1) (cds=) (gb=AW120525) (gi=6095858) (lug=Mm.28665) (len=441) (NOTE:replacement for probe set(s) 96213_at on MG-U74A)      |
| 102736_at            | 0.4727304 | 1.21E-03 | 961     | Cluster lnc M19681:Small inducible cytokine A2 (cds=82,528) (gb=M19681) (gi=193486) (lug=Mm.145) (len=798)                                                                                                                  |
| 97173_f_at           | 0.4727304 | 1.21E-03 | 962     | Cluster lnc M27134:Histocompatibility 2, K region locus 2 (cds=0,731) (gb=M27134) (gi=199435) (lug=Mm.35712) (len=732)                                                                                                      |
| 92428_at             | 0.4727304 | 1.21E-03 | 963     | Cluster lnc AF039405:Mus musculus aryl-ester-transacylating ATPase (AraA) mRNA, complete cds (cds=0,1052) (gb=AF039405) (gi=2745899) (lug=Mm.41475) (len=1053)                                                              |
| 83340_at             | 0.4727304 | 1.21E-03 | 964     | Cluster lnc X57337:Procollagen C-proteinase enhancer protein (cds=43,1251) (gb=X57337) (gi=1686405) (lug=Mm.18808) (len=1505)                                                                                               |
| 101653_f_at          | 0.4727304 | 1.21E-03 | 965     | Cluster lnc X52914:Histocompatibility 2, D region locus 4 (cds=94,522) (gb=X52914) (gi=57863) (lug=Mm.30377) (len=613)                                                                                                      |
| 94813_at             | 0.4727304 | 1.21E-03 | 966     | Cluster lnc X65128:Growth arrest specific 1 (cds=424,1578) (gb=X65128) (gi=51045) (lug=Mm.22701) (len=2961)                                                                                                                 |
| 103962_at            | 0.4727304 | 1.21E-03 | 967     | Cluster lnc X04123:Mouse mRNA for terminal deoxynucleotidyltransferase (TdT) (cds=51,1640) (gb=X04123) (gi=54765) (lug=Mm.25520) (len=2004)                                                                                 |
| 102789_at            | 0.4727304 | 1.21E-03 | 968     | Cluster lnc AB000906:GATA-binding protein 2 (cds=154,1598) (gb=AB000906) (gi=1754585) (lug=Mm.1391) (len=3153)                                                                                                              |
| 98914_at             | 0.4727304 | 1.21E-03 | 969     | Cluster lnc AB186334:U1-M-BHO-ajp-h-08-U1.s1 Mus musculus cDNA, 3' end (clone=U1-M-BHO-ajp-h-08-U1) (cds=) (gb=AB186334) (gi=5407540) (lug=Mm.28606) (len=374)                                                              |
| 97460_at             | 0.4727304 | 1.21E-03 | 970     | Cluster lnc AW122823:U1-M-BH2.1-acc-c-09-U1.s1 Mus musculus cDNA, 3' end (clone=U1-M-BH2.1-acc-c-09-U1) (cds=) (gb=AW122823) (gi=6098353) (lug=Mm.30272) (len=219)                                                          |
| 95294_at             | 0.4727304 | 1.21E-03 | 971     | Cluster lnc AI605509:vc2805.x1 Mus musculus cDNA, 3' end (clone=IMAGE-105123) (cds=) (gb=AI605509) (gi=4614676) (lug=Mm.1939) (len=361)                                                                                     |
| 161915_f_at          | 0.4727304 | 1.21E-03 | 972     | Cluster lnc AV133209:AV133209 Mus musculus cDNA (clone=720096C21) (cds=) (gb=AV133209) (gi=5338959) (lug=Mm.70066) (len=210) (NOTE:replacement for probe set(s) 98704_f_at on MG-U74A)                                      |
| 96779_f_at           | 0.4727304 | 1.21E-03 | 973     | Cluster lnc AI846315:U1-M-AK1-anez-h-08-U1.s1 Mus musculus cDNA, 3' end (clone=U1-M-AK1-anez-h-08-U1) (cds=) (gb=AI846315) (gi=5490221) (lug=Mm.29063) (len=345)                                                            |
| 160077_at            | 0.4727304 | 1.21E-03 | 974     | Cluster lnc AF004107:Mus musculus unknown protein mRNA, complete cds (cds=251,1153) (gb=AF004107) (gi=2183322) (lug=Mm.13430) (len=1371) (NOTE:replacement for probe set(s) 92844_at on MG-U74A)                            |
| 161147_f_at          | 0.4727304 | 1.21E-03 | 975     | Cluster lnc AV221100:AV221100 Mus musculus cDNA, 3' end (clone=3230402016) (cds=) (gb=AV221100) (gi=6170277) (lug=Mm.54475) (len=277) (NOTE:replacement for probe set(s) 100793_at on MG-U74A)                              |
| 95491_at             | 0.4727304 | 1.21E-03 | 976     | Cluster lnc AB015652:Mus musculus gene for DJ-1, complete cds (cds=0,521) (gb=AB015652) (gi=3256342) (lug=Mm.2507) (len=522)                                                                                                |
| 102859_at            | 0.4727304 | 1.21E-03 | 977     | Cluster lnc AW121304:U1-M-BH2.3-acc-g-02-U1.s1 Mus musculus cDNA, 3' end (clone=U1-M-BH2.3-acc-g-02-U1) (cds=) (gb=AW121304) (gi=6099637) (lug=Mm.14902) (len=261)                                                          |
| 102194_at            | 0.4727304 | 1.21E-03 | 978     | Cluster lnc AW122332:U1-M-BH2.2-acc-f-10-U1.s1 Mus musculus cDNA, 3' end (clone=U1-M-BH2.2-acc-f-10-U1) (cds=) (gb=AW122332) (gi=6097817) (lug=Mm.98631) (len=303)                                                          |
| 160889_at            | 0.4727304 | 1.21E-03 | 979     | Cluster lnc AI849490:U1-M-AH1-agt-c-11-U1.s1 Mus musculus cDNA, 3' end (clone=U1-M-AH1-agt-c-11-U1) (cds=) (gb=AI849490) (gi=5493396) (lug=Mm.41625) (len=266) (NOTE:replacement for probe set(s) 99496_at on MG-U74A)      |
| 97316_at             | 0.4727304 | 1.21E-03 | 980     | Cluster lnc AJ011864:Mus musculus mRNA for L-specific multifunctional beta-oxidation protein, partial CDS (cds=0,854) (gb=AJ011864) (gi=5830359) (lug=Mm.28100) (len=1649)                                                  |
| 94457_f_at           | 0.4727304 | 1.21E-03 | 981     | Cluster lnc AW049735:U1-M-BH1-ang-b-08-U1.s1 Mus musculus cDNA, 3' end (clone=U1-M-BH1-ang-b-08-U1) (cds=) (gb=AW049735) (gi=5910284) (lug=Mm.28606) (len=510)                                                              |
| 101097_at            | 0.4727304 | 1.21E-03 | 982     | Cluster lnc AW121176:U1-M-BH2.3-acc-h-03-U1.s1 Mus musculus cDNA, 3' end (clone=U1-M-BH2.3-acc-h-03-U1) (cds=) (gb=AW121176) (gi=6096500) (lug=Mm.74084) (len=435)                                                          |
| 103574_at            | 0.4727304 | 1.21E-03 | 983     | Cluster lnc AI841606:U1-M-APD-abn-h-07-U1.s1 Mus musculus cDNA, 3' end (clone=U1-M-APD-abn-h-07-U1) (cds=) (gb=AI841606) (gi=5475819) (lug=Mm.1947) (len=378)                                                               |
| 96432_at             | 0.4727304 | 1.21E-03 | 984     | Cluster lnc X99384:Mus musculus mRNA for paladin gene (cds=46,2625) (gb=X99384) (gi=1545098) (lug=Mm.3437) (len=4055)                                                                                                       |
| 94381_at             | 0.4727304 | 1.21E-03 | 985     | Cluster lnc L13783:Mus musculus uridine kinase mRNA, partial cds (cds=0,782) (gb=L13783) (gi=471980) (lug=Mm.2559) (len=1810)                                                                                               |
| 98102_at             | 0.4727304 | 1.21E-03 | 986     | Cluster lnc AF7272:Pyruvate dehydrogenase E1 alpha subunit (cds=111,1283) (gb=AF7272) (gi=200276) (lug=Mm.34775) (len=1446)                                                                                                 |
| 160104_at            | 0.4727304 | 1.21E-03 | 987     | Cluster lnc AA824102:vy20a0.r1 Mus musculus cDNA, 5' end (clone=IMAGE-1295982) (cds=) (gb=AA824102) (gi=2893970) (lug=Mm.1845) (len=521) (NOTE:replacement for probe set(s) 93307_at on MG-U74A)                            |
| 94394_at             | 0.4727304 | 1.21E-03 | 988     | Cluster lnc M21019:Harvey rat sarcoma oncogene, subgroup R (cds=11,667) (gb=M21019) (gi=200676) (lug=Mm.257) (len=949)                                                                                                      |
| 94897_at             | 0.4727304 | 1.21E-03 | 989     | Cluster lnc D87896:Glutathione peroxidase 4 (cds=144,737) (gb=D87896) (gi=2522258) (lug=Mm.2400) (len=958)                                                                                                                  |
| 96650_at             | 0.4727304 | 1.21E-03 | 990     | Cluster lnc AI837724:U1-M-AKO-adj-f-11-U1.s1 Mus musculus cDNA, 3' end (clone=U1-M-AKO-adj-f-11-U1) (cds=) (gb=AI837724) (gi=5471937) (lug=Mm.2733) (len=370)                                                               |
| 103530_at            | 0.4699461 | 1.29E-03 | 991     | Cluster lnc M85604:Snail homolog (Drosophila) (cds=14,808) (gb=M85604) (gi=429187) (lug=Mm.2935) (len=1541)                                                                                                                 |
| 162324_at            | 0.4699461 | 1.29E-03 | 992     | Cluster lnc AV083081:AV083081 Mus musculus cDNA (clone=230010P06) (cds=) (gb=AV083081) (gi=5214529) (lug=Mm.47652) (len=250) (NOTE:replacement for probe set(s) 102442_at on MG-U74A)                                       |
| 104598_at            | 0.4654576 | 1.44E-03 | 993     | Cluster lnc X61940:Mouse mRNA for a growth factor-inducible immediate early gene (3CH134) (cds=139,1242) (gb=X61940) (gi=49735) (lug=Mm.2404) (len=1933)                                                                    |
| 98304_at             | 0.4654576 | 1.44E-03 | 994     | Cluster lnc AB208208:Mus musculus mRNA for TLR6, complete cds (cds=20,2440) (gb=AB208208) (gi=5006249) (lug=Mm.42146) (len=2604)                                                                                            |
| 96127_at             | 0.4654576 | 1.44E-03 | 995     | Cluster lnc L16741:1. Capping protein alpha 2 (cds=195,6951) (gb=L16741) (gi=505916) (lug=Mm.3520) (len=1696)                                                                                                               |
| 93851_at             | 0.4654576 | 1.44E-03 | 996     | Cluster lnc AI272518:uk0407.y1 Mus musculus cDNA, 5' end (clone=IMAGE-1958461) (cds=) (gb=AI272518) (gi=3804786) (lug=Mm.87216) (len=480)                                                                                   |
| 102007_at            | 0.4654576 | 1.44E-03 | 997     | Cluster lnc U36788:Human putative holocytochrome c-type synthetase mRNA, complete cds (cds=55,873) (gb=U36788) (gi=1209636) (lug=Mm.10001) (len=889)                                                                        |
| 97383_at             | 0.4654576 | 1.44E-03 | 998     | Cluster lnc AI84823:U1-M-AH1-agg-v-05-U1.s1 Mus musculus cDNA, 3' end (clone=U1-M-AH1-agg-v-05-U1) (cds=) (gb=AI84823) (gi=5492659) (lug=Mm.29762) (len=466)                                                                |
| 97106_at             | 0.4654576 | 1.44E-03 | 999     | Cluster lnc D13789:Mouse mRNA for proto-oncogene protein (cds=124,1527) (gb=D13789) (gi=286072) (lug=Mm.3275) (len=2507)                                                                                                    |
| 92310_at             | 0.4654576 | 1.44E-03 | 1000    | Cluster lnc M06163:Mus musculus (clone 2) serum inducible kinase (SNK) mRNA, complete cds (cds=106,6163) (gb=M06163) (gi=200999) (lug=Mm.380) (len=2772)                                                                    |
| 161329_f_at          | 0.4654576 | 1.44E-03 | 1001    | Cluster lnc AV107153:AV107153 Mus musculus cDNA (clone=251020903) (cds=) (gb=AV107153) (gi=5254701) (lug=Mm.58401) (len=209) (NOTE:replacement for probe set(s) 94591_f_at on MG-U74A)                                      |
| 97448_at             | 0.4654576 | 1.44E-03 | 1002    | Cluster lnc AI845165:U1-M-BG0-ahs-g-10-U1.s1 Mus musculus cDNA, 3' end (clone=U1-M-BG0-ahs-g-10-U1) (cds=) (gb=AI845165) (gi=5489071) (lug=Mm.30245) (len=214)                                                              |
| 94237_at             | 0.4654576 | 1.44E-03 | 1003    | Cluster lnc AI846708:U1-M-ANI-af-g-08-U1.s1 Mus musculus cDNA, 3' end (clone=U1-M-ANI-af-g-08-U1) (cds=) (gb=AI846708) (gi=5490814) (lug=Mm.22333) (len=342)                                                                |
| 160626_at            | 0.4654576 | 1.44E-03 | 1004    | Cluster lnc AI850771:U1-M-BG1-ahk-f-04-U1.s1 Mus musculus cDNA, 3' end (clone=U1-M-BG1-ahk-f-04-U1) (cds=) (gb=AI850771) (gi=5494613) (lug=Mm.30264) (len=261) (NOTE:replacement for probe set(s) 97938_at on MG-U74A)      |
| 102805_at            | 0.4654576 | 1.44E-03 | 1005    | Cluster lnc M77196:Binary glycoprotein 1 (cds=690,1445) (gb=M77196) (gi=194002) (lug=Mm.14114) (len=2645)                                                                                                                   |
| 96352_at             | 0.4654576 | 1.44E-03 | 1006    | Cluster lnc AI848845:U1-M-AJ1-ahb-d-02-U1.s1 Mus musculus cDNA, 3' end (clone=U1-M-AJ1-ahb-d-02-U1) (cds=) (gb=AI848845) (gi=5492751) (lug=Mm.30003) (len=402)                                                              |
| 93922_g_at           | 0.4654576 | 1.44E-03 | 1007    | Cluster lnc AI573901:ud46a12.y1 Mus musculus cDNA, 5' end (clone=IMAGE-1448926) (cds=) (gb=AI573901) (gi=4536975) (lug=Mm.89655) (len=535)                                                                                  |
| 97462_at             | 0.4654576 | 1.44E-03 | 1008    | Cluster lnc AI847584:U1-M-AP1-agg-a-06-U1.s1 Mus musculus cDNA, 3' end (clone=U1-M-AP1-agg-a-06-U1) (cds=) (gb=AI847584) (gi=5491490) (lug=Mm.3035) (len=340)                                                               |
| 160110_at            | 0.4654576 | 1.44E-03 | 1009    | Cluster lnc AI845338:U1-M-AD1-ahk-f-08-U1.s1 Mus musculus cDNA, 3' end (clone=U1-M-AD1-ahk-f-08-U1) (cds=) (gb=AI845338) (gi=5489444) (lug=Mm.2017) (len=192) (NOTE:replacement for probe set(s) 93545_at on MG-U74A)       |
| 97885_at             | 0.4654576 | 1.44E-03 | 1010    | Cluster lnc AB031386:Mus musculus mRNA for Clast1, complete cds (cds=196,987) (gb=AB031386) (gi=804793) (lug=Mm.28385) (len=1207)                                                                                           |
| 104174_at            | 0.4654576 | 1.44E-03 | 1011    | Cluster lnc J02700:Phosphodiesterase 1nucleotide pyrophosphatase 1 (cds=111,2828) (gb=J02700) (gi=200236) (lug=Mm.27254) (len=3224)                                                                                         |
| 160594_at            | 0.4654576 | 1.44E-03 | 1012    | Cluster lnc X81627:Mus musculus 2a3 gene (cds=53,655) (gb=X81627) (gi=1476201) (lug=Mm.3537) (len=884) (NOTE:replacement for probe set(s) 101974_at on MG-U74A)                                                             |
| 102161_f_at          | 0.4654576 | 1.44E-03 | 1013    | Cluster lnc X58909:Mouse MHC (Ck) c2a gene for class I antigen, exons 1-3 (cds=0,1089) (gb=X58909) (gi=53854) (lug=Mm.46912) (len=1089)                                                                                     |
| 97990_at             | 0.4654576 | 1.44E-03 | 1014    | Cluster lnc D88923:Myosin heavy chain 11, smooth muscle (cds=104,6022) (gb=D88923) (gi=1945077) (lug=Mm.3153) (len=6175)                                                                                                    |
| 104238_at            | 0.4654576 | 1.44E-03 | 1015    | Cluster lnc U60881:ADP-ribosyltransferase 5 (cds=382,1311) (gb=U60881) (gi=1522688) (lug=Mm.2816) (len=1547)                                                                                                                |
| 160607_at            | 0.4654576 | 1.44E-03 | 1016    | Cluster lnc AW123707:U1-M-BH2.1-apl-d-10-U1.s1 Mus musculus cDNA, 3' end (clone=U1-M-BH2.1-apl-d-10-U1) (cds=) (gb=AW123707) (gi=6099237) (lug=Mm.14580) (len=484) (NOTE:replacement for probe set(s) 102837_at on MG-U74A) |
| 95626_at             | 0.4654576 | 1.44E-03 | 1017    | Cluster lnc AA517021:v86903.r1 Mus musculus cDNA, 3' end (clone=IMAGE-893789) (cds=) (gb=AA517021) (gi=2259610) (lug=Mm.24691) (len=520)                                                                                    |
| 103044_g_at          | 0.4654576 | 1.44E-03 | 1018    | Cluster lnc Z55294:Mus musculus MTPC-1 gene (cds=540,746) (gb=Z55294) (gi=503859) (lug=Mm.16366) (len=654)                                                                                                                  |
| 160660_r_at          | 0.4654576 | 1.44E-03 | 1019    | Cluster lnc AI157424:use5607.r1 Mus musculus cDNA, 5' end (clone=IMAGE-149504) (cds=) (gb=AI157424) (gi=3685893) (lug=Mm.21082) (len=413) (NOTE:replacement for probe set(s) 103857_at on MG-U74A)                          |
| 160882_at            | 0.4654576 | 1.44E-03 | 1020    | Cluster lnc AW213866:u04c03.x1 Mus musculus cDNA, 3' end (clone=IMAGE-2645380) (cds=) (gb=AW213866) (gi=6520144) (lug=Mm.24995) (len=178) (NOTE:replacement for probe set(s) 103917_f_at on MG-U74A)                        |
| 160194_at            | 0.4654576 | 1.44E-03 | 1021    | Cluster lnc U18992:Glutaryl Coenzyme A dehydrogenase (cds=448,1364) (gb=U18992) (gi=1439520) (lug=Mm.2475) (len=1757) (NOTE:replacement for probe set(s) 95463_at on MG-U74A)                                               |
| 103277_f_at          | 0.4654576 | 1.44E-03 | 1022    | Cluster lnc AW071510:Mus musculus CPA-orienting protein 1 mRNA, complete cds (cds=205,6429) (gb=AW071510) (gi=3423521) (lug=Mm.20579) (len=6418)                                                                            |
| 95756_at             | 0.4654576 | 1.44E-03 | 1023    | Cluster lnc AI839681:U1-M-ANO-acc-p-02-U1.s1 Mus musculus cDNA, 3' end (clone=U1-M-ANO-acc-p-02-U1) (cds=) (gb=AI839681) (gi=5473394) (lug=Mm.29795) (len=348)                                                              |
| 100560_at            | 0.4654576 | 1.44E-03 | 1024    | Cluster lnc U95116:Platelet-activating factor acetylhydrolase, isoform 1b, beta 1 subunit (cds=859,2091) (gb=U95116) (gi=2072302) (lug=Mm.56337) (len=5832)                                                                 |
| 98169_s_at           | 0.4654576 | 1.44E-03 | 1025    | Cluster lnc AUJ020229:AUJ020229 Mus musculus cDNA, 5' end (clone=J0529B09) (cds=) (gb=AUJ020229) (gi=3375813) (lug=Mm.26206) (len=442)                                                                                      |
| 160296_at            | 0.4654576 | 1.44E-03 | 1026    | Cluster lnc AA611709:v89e05.r1 Mus musculus cDNA, 5' end (clone=IMAGE-1066304) (cds=) (gb=AA611709) (gi=2461744) (lug=Mm.27901) (len=205) (NOTE:replacement for probe set(s) 97266_at on MG-U74A)                           |
| 93360_at             | 0.4654576 | 1.44E-03 | 1027    | Cluster lnc AF07287:Mus musculus phosphotransferase System 2 (cds=104,267) (gb=AF07287) (gi=225343) (lug=Mm.18539) (len=1221)                                                                                               |
| 161454_f_at          | 0.4654576 | 1.44E-03 | 1028    | Cluster lnc AI021573:ab13c03.r1 Mus musculus cDNA, 5' end (clone=IMAGE-1366852) (cds=) (gb=AI021573) (gi=3235909) (lug=Mm.19669) (len=368) (NOTE:replacement for probe set(s) 103576_at on MG-U74A)                         |
| 94416_at             | 0.4654576 | 1.44E-03 | 1029    | Cluster lnc AF025653:Mus musculus mRNA capping enzyme (MCE) mRNA, complete cds (cds=31,1824) (gb=AF025653) (gi=2697126) (lug=Mm.26153) (len=4160)                                                                           |
| 161494_f_at          | 0.4654576 | 1.44E-03 | 1030    | Cluster lnc AV090776:AV090776 Mus musculus cDNA (clone=231005701) (cds=) (gb=AV090776) (gi=5238324) (lug=Mm.64462) (len=274) (NOTE:replacement for probe set(s) 95810_f_at on MG-U                                          |



## Supplemental DATA Table 1

Weisberg et al. Adipose tissue transcripts whose expression correlate with body mass

| Affymetrix Probe Set | ttau      | p-value  | klauser | Affymetrix Transcript Description                                                                                                                                                                                                    |
|----------------------|-----------|----------|---------|--------------------------------------------------------------------------------------------------------------------------------------------------------------------------------------------------------------------------------------|
| 100933_at            | -0.450912 | 2.02E-03 | 1141    | Cluster incl D45208.Mus musculus mRNA for HPC-1/eyntracin, complete cds (cds=(9,875)) (gb=D45208) (gi=3237185) (ug=Mm.6225) (len=2014)                                                                                               |
| 97478_at             | -0.450912 | 2.02E-03 | 1142    | Cluster incl AW046965.U1-M-BH1-ahp-c-09-0-U1.s1 Mus musculus cDNA, 3 end (clone=U1-M-BH1-ahp-c-09-0-U1) (clone_end=3) (gb=AW046965) (gi=5907494) (ug=Mm.30718) (len=368)                                                             |
| 104063_at            | -0.450912 | 2.02E-03 | 1143    | Cluster incl AI840130.U1-M-A00-acc-a-09-0-U1.s1 Mus musculus cDNA, 3 end (clone=U1-M-A00-acc-a-09-0-U1) (clone_end=3) (gb=AI840130) (gi=5474343) (ug=Mm.21586) (len=421)                                                             |
| 98588_at             | -0.450912 | 2.02E-03 | 1144    | Cluster incl AF100927.Mus musculus apolipoprotein-inducing factor 1 AF1 mRNA, complete cds (cds=(15,368)) (gb=AF100927) (gi=5484949) (ug=Mm.27922) (len=390)                                                                         |
| 94997_at             | -0.450912 | 2.02E-03 | 1145    | Cluster incl AF060883.Mus musculus endonuclease III, complete cds (cds=(97,843)) (gb=AF060883) (gi=159992) (ug=Mm.27343) (len=1374)                                                                                                  |
| 98457_at             | -0.450912 | 2.02E-03 | 1146    | Cluster incl AF020195.Mus musculus pancreas duodenal bicarbonate transporter mRNA, complete cds (cds=(29,3268)) (gb=AF020195) (gi=3296571) (ug=Mm.34747) (len=3337)                                                                  |
| 98451_at             | -0.450912 | 2.02E-03 | 1147    | Cluster incl AI843164.U1-M-AK1-aet-b-03-0-U1.s1 Mus musculus cDNA, 3 end (clone=U1-M-AK1-aet-b-03-0-U1) (clone_end=3) (gb=AI843164) (gi=5477377) (ug=Mm.34635) (len=375)                                                             |
| 160519_at            | -0.450912 | 2.02E-03 | 1148    | Cluster incl U263437.Mus musculus tissue inhibitor of metalloproteinases-3 (TIMP-3) gene (cds=(41,676)) (gb=U263437) (gi=1167533) (ug=Mm.4871) (len=1483) (NOTE=replacement for probe set(s) 100137_at on MG-U74A)                   |
| 97271_at             | -0.450912 | 2.02E-03 | 1149    | Cluster incl AI845593.U1-M-AQ1-axd-c-04-0-U1.s1 Mus musculus cDNA, 3 end (clone=U1-M-AQ1-axd-c-04-0-U1) (clone_end=3) (gb=AI845593) (gi=5484949) (ug=Mm.27922) (len=390)                                                             |
| 103202_at            | -0.450912 | 2.02E-03 | 1150    | Cluster incl AW047476.U1-M-BH1-ahp-g-04-0-U1.s1 Mus musculus cDNA, 3 end (clone=U1-M-BH1-ahp-g-04-0-U1) (clone_end=3) (gb=AW047476) (gi=5908005) (ug=Mm.1909) (len=248)                                                              |
| 93581_at             | -0.450912 | 2.02E-03 | 1151    | Cluster incl AI845121.U1-M-BG0-ahs-b-12-0-U1.s1 Mus musculus cDNA, 3 end (clone=U1-M-BG0-ahs-b-12-0-U1) (clone_end=3) (gb=AI845121) (gi=5489027) (ug=Mm.2060) (len=361)                                                              |
| 100423_f_at          | -0.450912 | 2.02E-03 | 1152    | Cluster incl AJ237939.Mus musculus partial STAT5B gene, exon 6-9 (cds=(0,618)) (gb=AJ237939) (gi=5689871) (ug=Mm.4697) (len=619)                                                                                                     |
| 160086_at            | -0.448022 | 2.16E-03 | 1153    | Cluster incl IY2390.Mus musculus TIGAT gene, promoter and exon 1 (cds=(19,368)) (gb=IY2390) (gi=3378242) (ug=Mm.15533) (len=340) (NOTE=replacement for probe set(s) 93060_e_at on MG-U74A)                                           |
| 98775_at             | -0.445255 | 2.30E-03 | 1154    | Cluster incl U27825.Mus musculus protein kinase homolog (mes1) mRNA, complete cds (cds=(133,1470)) (gb=U27825) (gi=581957) (ug=Mm.4678) (len=1681)                                                                                   |
| 93753_at             | 0.4436393 | 2.39E-03 | 1155    | Cluster incl AI82632.U1-M-BH0-aiu-f-10-0-U1.s1 Mus musculus cDNA, 3 end (clone=U1-M-BH0-aiu-f-10-0-U1) (clone_end=3) (gb=AI82632) (gi=5496538) (ug=Mm.21119) (len=346)                                                               |
| 93017_at             | 0.4436393 | 2.39E-03 | 1156    | Cluster incl AF077527.Mus musculus syntenin mRNA, complete cds (cds=(54,950)) (gb=AF077527) (gi=3342559) (ug=Mm.14744) (len=2043)                                                                                                    |
| 100136_at            | 0.4436393 | 2.39E-03 | 1157    | Cluster incl M32017.Lysosomal membrane glycoprotein 2 (cds=(0,692)) (gb=M32017) (gi=198799) (ug=Mm.486) (len=1067)                                                                                                                   |
| 98042_at             | 0.4436393 | 2.39E-03 | 1158    | Cluster incl AW049787.U1-M-BH1-ann-e-03-0-U1.s1 Mus musculus cDNA, 3 end (clone=U1-M-BH1-ann-e-03-0-U1) (clone_end=3) (gb=AW049787) (gi=5910316) (ug=Mm.34126) (len=434)                                                             |
| 93499_at             | 0.4436393 | 2.39E-03 | 1159    | Cluster incl U16740.Mus musculus capping protein alpha 1 subunit mRNA, partial cds (cds=(0,856)) (gb=U16740) (gi=5959516) (ug=Mm.19142) (len=2893)                                                                                   |
| 102280_at            | 0.4436393 | 2.39E-03 | 1160    | Cluster incl AB006758.Mus musculus Pcdh7 mRNA for B1H-protodactherin-a, complete cds (cds=(1004,4213)) (gb=AB006758) (gi=3513311) (ug=Mm.11964) (len=5520)                                                                           |
| 160396_at            | 0.4436393 | 2.39E-03 | 1161    | Cluster incl AI851401.U1-M-BH0-akj-a-07-0-U1.s1 Mus musculus cDNA, 3 end (clone=U1-M-BH0-akj-a-07-0-U1) (clone_end=3) (gb=AI851401) (gi=5495307) (ug=Mm.29775) (len=397) (NOTE=replacement for probe set(s) 95748_at on MG-U74A)     |
| 103492_at            | 0.4436393 | 2.39E-03 | 1162    | Cluster incl AF077738.Mus musculus metalloproteinase CPX-1 mRNA, complete cds (cds=(68,2236)) (gb=AF077738) (gi=5422262) (ug=Mm.22224) (len=2379)                                                                                    |
| 93575_at             | 0.4436393 | 2.39E-03 | 1163    | Cluster incl AF051102.Mus musculus gamma glutamyl hydrolase precursor, mRNA, complete cds (cds=(90,1043)) (gb=AF051102) (gi=3831561) (ug=Mm.20461) (len=1295)                                                                        |
| 104110_at            | 0.4436393 | 2.39E-03 | 1164    | Cluster incl AW060515.U1-M-BH1-ann-d-07-0-U1.s1 Mus musculus cDNA, 3 end (clone=U1-M-BH1-ann-d-07-0-U1) (clone_end=3) (gb=AW060515) (gi=6008286) (ug=Mm.21919) (len=330)                                                             |
| 98968_at             | 0.4436393 | 2.39E-03 | 1165    | Cluster incl X57377.Mus musculus dilute myosin heavy chain gene for novel heavy chain with unique C-terminal region (cds=(40,5601)) (gb=X57377) (gi=50714) (ug=Mm.3645) (len=7087)                                                   |
| 96040_at             | 0.4436393 | 2.39E-03 | 1166    | Cluster incl AI84158.vw5612.x1 Mus musculus cDNA, 3 end (clone=IMAGE-1247734) (clone_end=3) (gb=AI84158) (gi=4726233) (ug=Mm.27274) (len=488)                                                                                        |
| 101865_at            | 0.4436393 | 2.39E-03 | 1167    | Cluster incl AB009615.Mus musculus mRNA for type II phosphatidylinositol 3-oh phosphate kinase alpha, complete cds (cds=(51,1269)) (gb=AB009615) (gi=3062783) (ug=Mm.8771) (len=1515)                                                |
| 102925_at            | 0.4436393 | 2.39E-03 | 1168    | Cluster incl AA285446.vb2a12.r1 Mus musculus cDNA, 5 end (clone=IMAGE-763486) (clone_end=5) (gb=AA285446) (gi=1929668) (ug=Mm.16479) (len=415)                                                                                       |
| 100324_g_at          | 0.4436393 | 2.39E-03 | 1169    | Cluster incl Z23077.S-adenosylmethionine decarboxylase 3 (cds=(0,1004)) (gb=Z23077) (gi=396140) (ug=Mm.87749) (len=1005)                                                                                                             |
| 101034_at            | 0.4436393 | 2.39E-03 | 1170    | Cluster incl U076177.Growth factor receptor bound protein 2 (cds=(80,733)) (gb=U076177) (gi=464004) (ug=Mm.6900) (len=2362)                                                                                                          |
| 95721_at             | 0.4436393 | 2.39E-03 | 1171    | Cluster incl AW120722.U1-M-BH2-3-ary-a-09-0-U1.s1 Mus musculus cDNA, 3 end (clone=U1-M-BH2-3-ary-a-09-0-U1) (clone_end=3) (gb=AW120722) (gi=6096055) (ug=Mm.29725) (len=406)                                                         |
| 93063_at             | 0.4436393 | 2.39E-03 | 1172    | Cluster incl U82624.Mus musculus amyloid precursor protein (APP) gene, partial cds, exons 16 and 17 (cds=(0,247)) (gb=U82624) (gi=1778801) (ug=Mm.15571) (len=248)                                                                   |
| 101294_g_at          | 0.4436393 | 2.39E-03 | 1173    | Cluster incl Z84471.Mus musculus G6p2-2 gene (cds=(0,1541)) (gb=Z84471) (gi=1806125) (ug=Mm.56918) (len=1542)                                                                                                                        |
| 102380_at            | 0.4436393 | 2.39E-03 | 1174    | Cluster incl AB012611.Mus musculus Hbp mRNA for Hrs binding Protein, complete cds (cds=(64,1635)) (gb=AB012611) (gi=3721564) (ug=Mm.20891) (len=1780)                                                                                |
| 161042_at            | 0.4436393 | 2.39E-03 | 1175    | Cluster incl AI824801.mcs2010.x1 Mus musculus cDNA, 3 end (clone=IMAGE-350227) (clone_end=3) (gb=AI824801) (gi=4059230) (ug=Mm.4152) (len=311) (NOTE=replacement for probe set(s) 92680_at on MG-U74A)                               |
| 100116_at            | 0.4436393 | 2.39E-03 | 1176    | Cluster incl AI22538.vd2607.r1 Mus musculus cDNA, 5 end (clone=IMAGE-1430245) (clone_end=5) (gb=AI22538) (gi=3522862) (ug=Mm.46673) (len=506)                                                                                        |
| 93276_at             | 0.4436393 | 2.39E-03 | 1177    | Cluster incl U90123.Hematological and neurological expressed sequence 1 (cds=(95,559)) (gb=U90123) (gi=1864164) (ug=Mm.1775) (len=1384)                                                                                              |
| 96794_at             | 0.4436393 | 2.39E-03 | 1178    | Cluster incl AI851584.U1-M-BH0-aki-g-08-0-U1.s1 Mus musculus cDNA, 3 end (clone=U1-M-BH0-aki-g-08-0-U1) (clone_end=3) (gb=AI851584) (gi=5495490) (ug=Mm.29145) (len=317)                                                             |
| 95939_j_at           | 0.4436393 | 2.39E-03 | 1179    | Cluster incl AW047237.U1-M-BH1-amb-g-05-0-U1.s1 Mus musculus cDNA, 3 end (clone=U1-M-BH1-amb-g-05-0-U1) (clone_end=3) (gb=AW047237) (gi=5907766) (ug=Mm.24851) (len=420)                                                             |
| 160446_at            | 0.4436393 | 2.39E-03 | 1180    | Cluster incl AI646750.vb6512.x1 Mus musculus cDNA, 3 end (clone=IMAGE-1382614) (clone_end=3) (gb=AI646750) (gi=4725225) (ug=Mm.38173) (len=478) (NOTE=replacement for probe set(s) 98591_at on MG-U74A)                              |
| 160353_f_at          | 0.4436393 | 2.39E-03 | 1181    | Cluster incl X78589.Mus musculus mRNA for MAP kinase-activated protein kinase 2 (cds=(0,1157)) (gb=X78589) (gi=1089895) (ug=Mm.29725) (len=1247) (NOTE=replacement for probe set(s) 95750_at on MG-U74A)                             |
| 160152_at            | 0.4436393 | 2.39E-03 | 1182    | Cluster incl U39302.Protease (prosome, macrocain) 26S subunit, ATpase 1 (cds=(8,1330)) (gb=U39302) (gi=1066066) (ug=Mm.2222) (len=1503) (NOTE=replacement for probe set(s) 94213_at on MG-U74A)                                      |
| 93327_at             | 0.4436393 | 2.39E-03 | 1183    | Cluster incl AI842665.U1-M-A01-aeo-a-02-0-U1.s1 Mus musculus cDNA, 3 end (clone=U1-M-A01-aeo-a-02-0-U1) (clone_end=3) (gb=AI842665) (gi=5476878) (ug=Mm.186) (len=288)                                                               |
| 92746_at             | 0.4436393 | 2.39E-03 | 1184    | Cluster incl U37249.Mus musculus arylamine N-acetyltransferase stable form (NAT2) gene, complete cds (cds=(0,872)) (gb=U37249) (gi=1049296) (ug=Mm.4695) (len=873)                                                                   |
| 100692_f_at          | 0.4436393 | 2.39E-03 | 1185    | Cluster incl U25298.Mus musculus immunoglobulin heavy chain variable region mRNA, complete cds (cds=(0,719)) (gb=U25298) (gi=1480721) (ug=Mm.14141) (len=720)                                                                        |
| 101745_f_at          | 0.4436393 | 2.39E-03 | 1186    | Cluster incl X94422.Mus musculus mRNA (1F6) for IgA V-D-J-heavy chain (cds=(0,453)) (gb=X94422) (gi=1181229) (ug=Mm.57072) (len=454)                                                                                                 |
| 160116_at            | -0.443639 | 2.39E-03 | 1187    | Cluster incl AF052680.Mus musculus thoreodioxin-related protein mRNA, complete cds (cds=(15,884)) (gb=AF052680) (gi=2970690) (ug=Mm.19169) (len=1110) (NOTE=replacement for probe set(s) 93504_at on MG-U74A)                        |
| 98424_at             | -0.443639 | 2.39E-03 | 1188    | Cluster incl D83966.Protein tyrosine phosphatase, non-receptor type 13 (cds=(41,7393)) (gb=D83966) (gi=1232103) (ug=Mm.3414) (len=7912)                                                                                              |
| 103540_at            | -0.443639 | 2.39E-03 | 1189    | Cluster incl AA426714.vc2608.r1 Mus musculus cDNA, 5 end (clone=IMAGE-819086) (clone_end=5) (gb=AA426714) (gi=2109502) (ug=Mm.23501) (len=551)                                                                                       |
| 94802_at             | -0.443639 | 2.39E-03 | 1190    | Cluster incl AI846878.U1-M-AK1-axd-b-11-0-U1.s1 Mus musculus cDNA, 3 end (clone=U1-M-AK1-axd-b-11-0-U1) (clone_end=3) (gb=AI846878) (gi=5490584) (ug=Mm.1835) (len=142)                                                              |
| 160207_at            | -0.443639 | 2.39E-03 | 1191    | Cluster incl AW121639.U1-M-BH2-3-acc-a-08-0-U1.s1 Mus musculus cDNA, 3 end (clone=U1-M-BH2-3-acc-a-08-0-U1) (clone_end=3) (gb=AW121639) (gi=6096972) (ug=Mm.25316) (len=438) (NOTE=replacement for probe set(s) 95519_at on MG-U74A) |
| 162279_f_at          | -0.443639 | 2.39E-03 | 1192    | Cluster incl AV370410.AV370410 Mus musculus cDNA, 3 end (clone=903216M21) (clone_end=3) (gb=AV370410) (gi=6418057) (ug=Mm.99717) (len=240) (NOTE=replacement for probe set(s) 100664_f_at on MG-U74A)                                |
| 95980_s_at           | -0.443639 | 2.39E-03 | 1193    | Cluster incl U16818.Mus musculus UDP glucuronosyltransferase (UGT1-06) mRNA, complete cds (cds=(128,1723)) (gb=U16818) (gi=801898) (ug=Mm.42472) (len=2300)                                                                          |
| 104455_j_at          | -0.443639 | 2.39E-03 | 1194    | Cluster incl AI841235.U1-M-A00-acc-a-05-0-U1.s1 Mus musculus cDNA, 3 end (clone=U1-M-A00-acc-a-05-0-U1) (clone_end=3) (gb=AI841235) (gi=5475448) (ug=Mm.29567) (len=126)                                                             |
| 161043_at            | -0.443639 | 2.39E-03 | 1195    | Cluster incl AV146057.AV146057 Mus musculus cDNA (clone=281045E03) (clone_end=3) (gb=AV146057) (gi=6350190) (ug=Mm.46509) (len=289) (NOTE=replacement for probe set(s) 92729_at on MG-U74A)                                          |
| 160947_at            | -0.443639 | 2.39E-03 | 1196    | Cluster incl AI851258.U1-M-BH0-akf-c-06-0-U1.s1 Mus musculus cDNA, 3 end (clone=U1-M-BH0-akf-c-06-0-U1) (clone_end=3) (gb=AI851258) (gi=5495164) (ug=Mm.1560) (len=407) (NOTE=replacement for probe set(s) 102897_at on MG-U74A)     |
| 99460_at             | -0.443639 | 2.39E-03 | 1197    | Cluster incl X85990.Mus musculus mRNA for semaphorin A (cds=(209,2455)) (gb=X85990) (gi=854323) (ug=Mm.4083) (len=2872)                                                                                                              |
| 161386_f_at          | -0.443639 | 2.39E-03 | 1198    | Cluster incl AV252908.AV252908 Mus musculus cDNA, 3 end (clone=4833443D16) (clone_end=3) (gb=AV252908) (gi=6240367) (ug=Mm.60292) (len=239) (NOTE=replacement for probe set(s) 95169_f_at on MG-U74A)                                |
| 161013_at            | -0.443639 | 2.39E-03 | 1199    | Cluster incl AI89360.meb005.x1 Mus musculus cDNA, 3 end (clone=IMAGE-391880) (clone_end=3) (gb=AI89360) (gi=4605408) (ug=Mm.30) (len=389) (NOTE=replacement for probe set(s) 104478_f_at on MG-U74A)                                 |
| 97536_at             | -0.443639 | 2.39E-03 | 1200    | Cluster incl AW046850.U1-M-BH1-ald-e-10-0-U1.s1 Mus musculus cDNA, 3 end (clone=U1-M-BH1-ald-e-10-0-U1) (clone_end=3) (gb=AW046850) (gi=5907179) (ug=Mm.3308) (len=336)                                                              |
| 95653_at             | -0.443639 | 2.39E-03 | 1201    | Cluster incl AW124681.U1-M-BH2-1-apw-g-06-0-U1.s1 Mus musculus cDNA, 3 end (clone=U1-M-BH2-1-apw-g-06-0-U1) (clone_end=3) (gb=AW124681) (gi=6100211) (ug=Mm.42193) (len=421)                                                         |
| 94662_at             | -0.443639 | 2.39E-03 | 1202    | Cluster incl AA409766.EST101475 Mus musculus cDNA, 3 end (clone=C0010D03) (clone_end=3) (gb=AA409766) (gi=2066390) (ug=Mm.24471) (len=316)                                                                                           |
| 101910_f_at          | -0.443639 | 2.39E-03 | 1203    | Cluster incl AI833977.U1-M-BH0-ahp-f-01-0-U1.s1 Mus musculus cDNA, 3 end (clone=U1-M-BH0-ahp-f-01-0-U1) (clone_end=3) (gb=AI833977) (gi=5497883) (ug=Mm.21158) (len=265)                                                             |
| 93838_f_at           | -0.443639 | 2.39E-03 | 1204    | Cluster incl U02995.Defensin related cysteine peptide (cds=(45,326)) (gb=U02995) (gi=218210) (ug=Mm.12833) (len=336)                                                                                                                 |
| 96743_at             | -0.443639 | 2.39E-03 | 1205    | Cluster incl AA958560.ua1409.r1 Mus musculus cDNA, 5 end (clone=IMAGE-1346729) (clone_end=5) (gb=AA958560) (gi=3124790) (ug=Mm.28936) (len=292)                                                                                      |
| 92718_at             | -0.443639 | 2.39E-03 | 1206    | Cluster incl AI158810.ud38d09.r1 Mus musculus cDNA, 5 end (clone=IMAGE-1448177) (clone_end=5) (gb=AI158810) (gi=3691992) (ug=Mm.46382) (len=264)                                                                                     |
| 92786_at             | -0.443639 | 2.39E-03 | 1207    | Cluster incl AI826942.vb77011.x1 Mus musculus cDNA, 3 end (clone=IMAGE-1152285) (clone_end=3) (gb=AI826942) (gi=4663742) (ug=Mm.12454) (len=306)                                                                                     |
| 161201_f_at          | -0.443639 | 2.39E-03 | 1208    | Cluster incl AV049898.AV049898 Mus musculus cDNA (clone=181011F21) (clone_end=3) (gb=AV049898) (gi=5135670) (ug=Mm.57716) (len=222) (NOTE=replacement for probe set(s) 102607_f_at on MG-U74A)                                       |
| 92831_at             | -0.443639 | 2.39E-03 | 1209    | Cluster incl AI846308.U1-M-AK1-aez-g-10-0-U1.s1 Mus musculus cDNA, 3 end (clone=U1-M-AK1-aez-g-10-0-U1) (clone_end=3) (gb=AI846308) (gi=5490214) (ug=Mm.12983) (len=263)                                                             |
| 92726_at             | -0.443639 | 2.39E-03 | 1210    | Cluster incl AJ010605.SRY-box containing gene 6 (cds=(0,931)) (gb=AJ010605) (gi=3702611) (ug=Mm.4656) (len=3371)                                                                                                                     |
| 102737_at            | -0.443639 | 2.39E-03 | 1211    | Cluster incl U36293.Endothelin 1 (cds=(30,838)) (gb=U36293) (gi=1244501) (ug=Mm.14543) (len=1770)                                                                                                                                    |
| 103309_f_at          | -0.443639 | 2.39E-03 | 1212    | Cluster incl AI833977.U1-M-BH0-ahp-f-01-0-U1.s1 Mus musculus cDNA, 3 end (clone=U1-M-BH0-ahp-f-01-0-U1) (clone_end=3) (gb=AI833977) (gi=5497883) (ug=Mm.21158) (len=265)                                                             |
| 92812_f_at           | -0.443639 | 2.39E-03 | 1213    | Cluster incl U02995.Defensin related cysteine peptide (cds=(45,326)) (gb=U02995) (gi=218210) (ug=Mm.12833) (len=336)                                                                                                                 |
| 104264_f_at          | -0.443639 | 2.39E-03 | 1214    | Cluster incl AW122230.U1-M-BH2-2-aoe-v-05-0-U1.s1 Mus musculus cDNA, 3 end (clone=U1-M-BH2-2-aoe-v-05-0-U1) (clone_end=3) (gb=AW122230) (gi=6097693) (ug=Mm.28458) (len=266)                                                         |
| 160780_at            | -0.443639 | 2.39E-03 | 1215    | Cluster incl AJ223069.Mus musculus mRNA for TCF-3 protein (cds=(4,1758)) (gb=AJ223069) (gi=3123637) (ug=Mm.28396) (len=1949) (NOTE=replacement for probe set(s) 96173_at on MG-U74A)                                                 |
| 96114_at             | -0.443639 | 2.39E-03 | 1216    | Cluster incl U22176.U1-M-BH2-2-aoe-v-05-0-U1.s1 Mus musculus cDNA, 3 end (clone=U1-M-BH2-2-aoe-v-05-0-U1) (clone_end=3) (gb=U22176) (gi=6097483) (ug=Mm.26958) (len=363)                                                             |
| 103286_at            | -0.443639 | 2.39E-03 | 1217    | Cluster incl AF053662.Mus musculus receptor interacting protein 140 (cds=(0,385)) (gb=AF053662) (gi=1480721) (ug=Mm.14141) (len=720)                                                                                                 |
| 96047_at             | -0.443639 | 2.39E-03 | 1218    | Cluster incl UG1146.Mus musculus retinol binding protein (RBP) mRNA, complete cds (cds=(0,605)) (gb=UG1146) (gi=1515445) (ug=Mm.2605) (len=606)                                                                                      |
| 95275_at             | -0.444022 | 2.46E-03 | 1219    | Cluster incl M84746.Interleukin 9 receptor (cds=(4,1410)) (gb=M84746) (gi=194044) (ug=Mm.384) (len=3020)                                                                                                                             |
| 97928_at             | 0.4408022 | 2.55E-03 | 1220    | Cluster incl AW045278.U1-M-BH1-akn-c-07-0-U1.s1 Mus musculus cDNA, 3 end (clone=U1-M                                                                                                                                                 |

## Supplemental DATA Table 1

Weisberg et al. Adipose tissue transcripts whose expression correlate with body mass

| Affymetrix Probe Set | ttau      | p-value  | ktauornd | Affymetrix Transcript Description                                                                                                                                                                                            |
|----------------------|-----------|----------|----------|------------------------------------------------------------------------------------------------------------------------------------------------------------------------------------------------------------------------------|
| 10004_at             | 0.4363665 | 2.81E-03 | 1236     | Cluster lnc AW049685.U1-M-BH1-anc-c-01-0-U1.s1 Mus musculus cDNA, 3 end /clone=U1-M-BH1-anc-c-01-0-U1 /clone_end=3 /gb=AW049685 /gi=5910214 /ug=Mm.4436 /len=515                                                             |
| 102905_at            | 0.4363665 | 2.81E-03 | 1237     | Cluster lnc Y13089.Musculus mRNA for caspase-11 /cids=(26,1147) /gb=Y13089 /gi=2094083 /ug=Mm.1569 /len=1340                                                                                                                 |
| 102952_at            | 0.4363665 | 2.81E-03 | 1238     | Cluster lnc M22623.Mouse interferon-gamma receptor mRNA, complete cds /cids=(101,1534) /gb=M22623 /gi=194131 /ug=Mm.549 /len=2093                                                                                            |
| 95731_at             | 0.4363665 | 2.81E-03 | 1239     | Cluster lnc AI845136.U1-M-AK1-aeq-a-01-0-U1.s1 Mus musculus cDNA, 3 end /clone=U1-M-AK1-aeq-a-01-0-U1 /clone_end=3 /gb=AI845136 /gi=5477319 /ug=Mm.20742 /len=302                                                            |
| 92182_at             | 0.4363665 | 2.81E-03 | 1240     | Cluster lnc AI83877.U1-M-AP0-abg-c-08-0-U1.s2 Mus musculus cDNA, 3 end /clone=U1-M-AP0-abg-c-08-0-U1 /clone_end=3 /gb=AI83877 /gi=5471090 /ug=Mm.33851 /len=395                                                              |
| 97763_at             | 0.4363665 | 2.81E-03 | 1241     | Cluster lnc AB026683.Mus musculus mRNA for p47phox, complete cds /cids=(37,1209) /gb=AB026683 /gi=3061281 /ug=Mm.4149 /len=1210                                                                                              |
| 103748_at            | 0.4363665 | 2.81E-03 | 1242     | Cluster lnc AW125627.U1-M-BH2.2-aq-h-03-0-U1.s1 Mus musculus cDNA, 3 end /clone=U1-M-BH2.2-aq-h-03-0-U1 /clone_end=3 /gb=AW125627 /gi=6101157 /ug=Mm.24488 /len=466                                                          |
| 101019_at            | 0.4363665 | 2.81E-03 | 1243     | Cluster lnc U74683.Cathepsin C /cids=(67,1455) /gb=U74683 /gi=2145015 /ug=Mm.684 /len=1767                                                                                                                                   |
| 93819_at             | 0.4363665 | 2.81E-03 | 1244     | Cluster lnc AI847289.U1-M-A11-afq-h-06-0-U1.s1 Mus musculus cDNA, 3 end /clone=U1-M-A11-afq-h-06-0-U1 /clone_end=3 /gb=AI847289 /gi=5491175 /ug=Mm.21507 /len=287                                                            |
| 104758_at            | 0.4363665 | 2.81E-03 | 1245     | Cluster lnc AA895984.vx52h06.r1 Mus musculus cDNA, 5 end /clone=IMAGE-1278875 /clone_end=5 /gb=AA895984 /gi=3032377 /ug=Mm.24794 /len=339                                                                                    |
| 93466_at             | 0.4363665 | 2.81E-03 | 1246     | Cluster lnc AF022962.Secretory protein SEC8 (S. cerevisiae) /cids=(29,2944) /gb=AF022962 /gi=2547135 /ug=Mm.6925 /len=3155                                                                                                   |
| 101399_at            | 0.4363665 | 2.81E-03 | 1247     | Cluster lnc M77174.Parlecan (heparan sulfate proteoglycan 2) /cids=(878,11701) /gb=M77174 /gi=200295 /ug=Mm.7257 /len=12667                                                                                                  |
| 92198_s_at           | 0.4363665 | 2.81E-03 | 1248     | Cluster lnc X12618.Mouse c-fes proto-oncogene mRNA for c-fes protein /cids=(59,2521) /gb=X12618 /gi=59955 /ug=Mm.3394 /len=2680                                                                                              |
| 95448_at             | 0.4363665 | 2.81E-03 | 1249     | Cluster lnc AI839371.U1-M-ANO-aq-g-11-0-U1.s1 Mus musculus cDNA, 3 end /clone=U1-M-ANO-aq-g-11-0-U1 /clone_end=3 /gb=AI839371 /gi=5473354 /ug=Mm.2462 /len=393                                                               |
| 104582_g_at          | 0.4363665 | 2.81E-03 | 1250     | Cluster lnc AI845438.U1-M-AO1-aej-d-10-0-U1.s1 Mus musculus cDNA, 3 end /clone=U1-M-AO1-aej-d-10-0-U1 /clone_end=3 /gb=AI845438 /gi=5489339 /ug=Mm.23975 /len=369                                                            |
| 160110_at            | 0.4363665 | 2.81E-03 | 1251     | Cluster lnc AW124007.U1-M-BH2.1-apn-a-06-0-U1.s1 Mus musculus cDNA, 3 end /clone=U1-M-BH2.1-apn-a-06-0-U1 /clone_end=3 /gb=AW124007 /gi=6099537 /ug=Mm.18795 /len=430 /NOTE=replacement for probe set(s) 93345_at on MG-U74A |
| 160069_at            | 0.4363665 | 2.81E-03 | 1252     | Cluster lnc AA681520.vy4c2c1.s1 Mus musculus cDNA, 5 end /clone=IMAGE-125318 /clone_end=5 /gb=AA681520 /gi=2653660 /ug=Mm.12239 /len=509 /NOTE=replacement for probe set(s) 92772_at on MG-U74A                              |
| 95915_at             | 0.4363665 | 2.81E-03 | 1253     | Cluster lnc AA409520.EST101388 Mus musculus cDNA, 3 end /clone=CC000707 /clone_end=3 /gb=AA409520 /gi=2066303 /ug=Mm.24470 /len=317                                                                                          |
| 96641_at             | 0.4363665 | 2.81E-03 | 1254     | Cluster lnc AW060674.U1-M-BH1-anc-d-04-0-U1.s1 Mus musculus cDNA, 3 end /clone=U1-M-BH1-anc-d-04-0-U1 /clone_end=3 /gb=AW060674 /gi=6008425 /ug=Mm.27285 /len=486                                                            |
| 102340_at            | 0.4363665 | 2.81E-03 | 1255     | Cluster lnc AI842849.U1-M-AN1-afb-b-11-0-U1.s1 Mus musculus cDNA, 3 end /clone=U1-M-AN1-afb-b-11-0-U1 /clone_end=3 /gb=AI842849 /gi=5477062 /ug=Mm.11285 /len=243                                                            |
| 94253_at             | 0.4363665 | 2.81E-03 | 1256     | Cluster lnc AW061243.U1-M-BH1-amp-c-11-0-U1.s2 Mus musculus cDNA, 3 end /clone=U1-M-BH1-amp-c-11-0-U1 /clone_end=3 /gb=AW061243 /gi=6008994 /ug=Mm.22399 /len=430                                                            |
| 96131_at             | 0.4363665 | 2.81E-03 | 1257     | Cluster lnc AI840116.U1-M-AL0-afb-h-05-0-U1.s1 Mus musculus cDNA, 3 end /clone=U1-M-AL0-afb-h-05-0-U1 /clone_end=3 /gb=AI840116 /gi=5474329 /ug=Mm.28140 /len=348                                                            |
| 95674_r_at           | 0.4363665 | 2.81E-03 | 1258     | Cluster lnc AI851985.U1-M-BH0-aq-d-08-0-U1.s1 Mus musculus cDNA, 3 end /clone=U1-M-BH0-aq-d-08-0-U1 /clone_end=3 /gb=AI851985 /gi=5495801 /ug=Mm.29586 /len=404                                                              |
| 92357_at             | 0.4363665 | 2.81E-03 | 1259     | Cluster lnc AB009673.Mus musculus mRNA for ADAM23, complete cds /cids=(79,2568) /gb=AB009673 /gi=5736618 /ug=Mm.39533 /len=2891                                                                                              |
| 94259_at             | 0.4363667 | 2.81E-03 | 1260     | Cluster lnc AB024935.Mus musculus Sid3177 mRNA, complete cds /cids=(111,593) /gb=AB024935 /gi=5931546 /ug=Mm.22421 /len=1510                                                                                                 |
| 102343_at            | 0.4363667 | 2.81E-03 | 1261     | Cluster lnc M18775.Microtubule-associated protein tau /cids=(186,1211) /gb=M18775 /gi=201114 /ug=Mm.1287 /len=1266                                                                                                           |
| 102234_at            | 0.4363667 | 2.81E-03 | 1262     | Cluster lnc AF056187.Mus musculus insulin-like growth factor 1 receptor mRNA, complete cds /cids=(0,4121) /gb=AF056187 /gi=3025893 /ug=Mm.10226 /len=4500                                                                    |
| 104060_at            | 0.4363667 | 2.81E-03 | 1263     | Cluster lnc AI849577.U1-M-AP1-agl-b-12-0-U1.s1 Mus musculus cDNA, 3 end /clone=U1-M-AP1-agl-b-12-0-U1 /clone_end=3 /gb=AI849577 /gi=5498983 /ug=Mm.21568 /len=351                                                            |
| 100568_at            | 0.4363667 | 2.81E-03 | 1264     | Cluster lnc L12447.Insulin-like growth factor binding protein 5 /cids=(387,1202) /gb=L12447 /gi=425405 /ug=Mm.578 /len=5581                                                                                                  |
| 101432_at            | 0.4363667 | 2.81E-03 | 1265     | Cluster lnc AI504100.vms201.x1 Mus musculus cDNA, 3 end /clone=IMAGE-1001881 /clone_end=3 /gb=AI504100 /gi=4401951 /ug=Mm.7566 /len=300                                                                                      |
| 101059_at            | 0.4363667 | 2.81E-03 | 1266     | Cluster lnc D78440.Nestin /cids=(86,1063) /gb=D78440 /gi=1040890 /ug=Mm.7099 /len=1608                                                                                                                                       |
| 103263_at            | 0.4363667 | 2.81E-03 | 1267     | Cluster lnc AF079765.Mus musculus enhancer of polycomb (Epc1) mRNA, complete cds /cids=(220,2511) /gb=AF079765 /gi=3757891 /ug=Mm.20828 /len=3695                                                                            |
| 94005_at             | 0.4363667 | 2.81E-03 | 1268     | Cluster lnc AI157548.us5e05.r1 Mus musculus cDNA, 5 end /clone=IMAGE-1495065 /clone_end=5 /gb=AI157548 /gi=3686017 /ug=Mm.21780 /len=625                                                                                     |
| 101964_at            | 0.4363667 | 2.81E-03 | 1269     | Cluster lnc U05809.Transketolase /cids=(91,1962) /gb=U05809 /gi=452485 /ug=Mm.9307 /len=2062                                                                                                                                 |
| 104548_at            | 0.4363667 | 2.81E-03 | 1270     | Cluster lnc U51866.Mus musculus casein kinase II alpha subunit mRNA, complete cds /cids=(203,1378) /gb=U51866 /gi=1262299 /ug=Mm.26892 /len=1552                                                                             |
| 96594_at             | 0.4363667 | 2.81E-03 | 1271     | Cluster lnc AA415831.v0h06.r1 Mus musculus cDNA, 5 end /clone=IMAGE-106425 /clone_end=5 /gb=AA415831 /gi=2503059 /ug=Mm.30652 /len=257                                                                                       |
| 103520_at            | 0.4363667 | 2.81E-03 | 1272     | Cluster lnc M95200.Vascular endothelial growth factor /cids=(86,658) /gb=M95200 /gi=202350 /ug=Mm.22730 /len=980                                                                                                             |
| 98485_at             | 0.4363667 | 2.81E-03 | 1273     | Cluster lnc AI860288.U1-M-BG1-af-c-04-0-U1.s1 Mus musculus cDNA, 3 end /clone=U1-M-BG1-af-c-04-0-U1 /clone_end=3 /gb=AI860288 /gi=5494194 /ug=Mm.35465 /len=494                                                              |
| 96231_at             | 0.4363667 | 2.81E-03 | 1274     | Cluster lnc AW123780.U1-M-BH2.1-apm-c-10-0-U1.s1 Mus musculus cDNA, 3 end /clone=U1-M-BH2.1-apm-c-10-0-U1 /clone_end=3 /gb=AW123780 /gi=6099310 /ug=Mm.28775 /len=400                                                        |
| 99616_f_at           | 0.4363667 | 2.81E-03 | 1275     | Cluster lnc AI842156.U1-M-AN1-af-e-11-0-U1.s1 Mus musculus cDNA, 3 end /clone=U1-M-AN1-af-e-11-0-U1 /clone_end=3 /gb=AI842156 /gi=5476369 /ug=Mm.43017 /len=316                                                              |
| 92092_f_at           | 0.4363667 | 2.81E-03 | 1276     | Cluster lnc D63707.Mouse mRNA for hepatoma derived growth factor (HDGF), complete cds /cids=(61,774) /gb=D63707 /gi=945418 /ug=Mm.1141 /len=1563                                                                             |
| 103801_at            | 0.4363667 | 2.81E-03 | 1277     | Cluster lnc AF094761.Mus musculus Rfxank (Rfxank) mRNA, complete cds /cids=(201,1010) /gb=AF094761 /gi=3820617 /ug=Mm.20848 /len=1403                                                                                        |
| 98113_at             | 0.4363667 | 2.81E-03 | 1278     | Cluster lnc U60824.Mus musculus proteasome beta-subunit C5 (Pamb1) mRNA, allele B, complete cds /cids=(29,751) /gb=U60824 /gi=1698583 /ug=Mm.34837 /len=812                                                                  |
| 160550_i_at          | 0.4363667 | 2.81E-03 | 1279     | Cluster lnc AF035939.Mago-nashi homolog, proliferation-associated (Drosophila) /cids=(50,490) /gb=AF035939 /gi=2909827 /ug=Mm.808 /len=623 /NOTE=replacement for probe set(s) 101498_f_at, 101497_r_at on MG-U74A            |
| 96378_at             | 0.4363667 | 2.81E-03 | 1280     | Cluster lnc AW049566.U1-M-BH1-af-e-09-0-U1.s1 Mus musculus cDNA, 3 end /clone=U1-M-BH1-af-e-09-0-U1 /clone_end=3 /gb=AW049566 /gi=5908965 /ug=Mm.30073 /len=430                                                              |
| 103668_at            | 0.4363667 | 2.81E-03 | 1281     | Cluster lnc U04375.Suppressor of Ty 6 (S. cerevisiae) homolog /cids=(184,5364) /gb=U04375 /gi=1401056 /ug=Mm.20755 /len=5923                                                                                                 |
| 95587_at             | 0.4363667 | 2.81E-03 | 1282     | Cluster lnc AI837204.U1-M-AK0-add-f-07-0-U1.s1 Mus musculus cDNA, 3 end /clone=U1-M-AK0-add-f-07-0-U1 /clone_end=3 /gb=AI837204 /gi=5471417 /ug=Mm.27862 /len=287                                                            |
| 103432_at            | 0.4363667 | 2.81E-03 | 1283     | Cluster lnc AW122677.U1-M-BH2.2-aol-h-09-0-U1.s1 Mus musculus cDNA, 3 end /clone=U1-M-BH2.2-aol-h-09-0-U1 /clone_end=3 /gb=AW122677 /gi=6098207 /ug=Mm.19029 /len=161                                                        |
| 99651_at             | 0.4363667 | 2.81E-03 | 1284     | Cluster lnc AI849549.U1-M-AH1-af-a-10-0-U1.s1 Mus musculus cDNA, 3 end /clone=U1-M-AH1-af-a-10-0-U1 /clone_end=3 /gb=AI849549 /gi=5493455 /ug=Mm.43737 /len=279                                                              |
| 93217_at             | 0.4363667 | 2.81E-03 | 1285     | Cluster lnc AW049642.U1-M-BH1-af-g-02-0-U1.s1 Mus musculus cDNA, 3 end /clone=U1-M-BH1-af-g-02-0-U1 /clone_end=3 /gb=AW049642 /gi=5910171 /ug=Mm.5710 /len=444                                                               |
| 98404_at             | 0.4363667 | 2.81E-03 | 1286     | Cluster lnc X64587.Mus musculus mRNA for splicing factor U2AF (65 kD) /cids=UNKNOWN /gb=X64587 /gi=55100 /ug=Mm.3358 /len=2119                                                                                               |
| 94206_at             | 0.4363667 | 2.81E-03 | 1287     | Cluster lnc AC002397.Mouse chromosome 6 BAC-284H12 (Research Genetics mouse BAC library) complete sequence /cids=(108,488) /gb=AC002397 /gi=3287367 /ug=Mm.22195 /len=568                                                    |
| 102781_at            | 0.4363667 | 2.81E-03 | 1288     | Cluster lnc U37351.Mus musculus Paneth cell enhanced expression PCEE mRNA, complete cds /cids=(110,670) /gb=U37351 /gi=1276644 /ug=Mm.13725 /len=1220                                                                        |
| 103020_at            | 0.4363667 | 2.81E-03 | 1289     | Cluster lnc D86344.Mouse mRNA for Topoisomerase-inhibitor suppressed, complete cds /cids=(86,1405) /gb=D86344 /gi=171237 /ug=Mm.1605 /len=2196                                                                               |
| 104313_at            | 0.4363667 | 2.81E-03 | 1290     | Cluster lnc AI842432.U1-M-AM1-af-y-b-10-0-U1.s1 Mus musculus cDNA, 3 end /clone=U1-M-AM1-af-y-b-10-0-U1 /clone_end=3 /gb=AI842432 /gi=5476645 /ug=Mm.22403 /len=330                                                          |
| 99866_at             | 0.4363667 | 2.81E-03 | 1291     | Cluster lnc AI842417.v02g03.x1 Mus musculus cDNA, 3 end /clone=IMAGE-1161940 /clone_end=3 /gb=AI842417 /gi=4720892 /ug=Mm.7202 /len=320                                                                                      |
| 104239_at            | 0.4363667 | 2.81E-03 | 1292     | Cluster lnc AW208513.uo6002.x1 Mus musculus cDNA, 3 end /clone=IMAGE-2646939 /clone_end=3 /gb=AW208513 /gi=6514453 /ug=Mm.28172 /len=481                                                                                     |
| 98929_at             | 0.4363667 | 2.81E-03 | 1293     | Cluster lnc AI849452.U1-M-AO1-aez-f-09-0-U1.s1 Mus musculus cDNA, 3 end /clone=U1-M-AO1-aez-f-09-0-U1 /clone_end=3 /gb=AI849452 /gi=5490358 /ug=Mm.28664 /len=283                                                            |
| 97993_at             | 0.4363667 | 2.81E-03 | 1294     | Cluster lnc U04439.Uroporphyrinogen III synthase /cids=(78,875) /gb=U04439 /gi=506637 /ug=Mm.3180 /len=1497                                                                                                                  |
| 95592_at             | 0.4363667 | 2.81E-03 | 1295     | Cluster lnc AW046785.U1-M-BH1-af-z-a-05-0-U1.s1 Mus musculus cDNA, 3 end /clone=U1-M-BH1-af-z-a-05-0-U1 /clone_end=3 /gb=AW046785 /gi=5907314 /ug=Mm.279 /len=454                                                            |
| 101023_f_at          | 0.4363667 | 2.81E-03 | 1296     | Cluster lnc AI843605.U1-M-AO1-aez-h-06-0-U1.s1 Mus musculus cDNA, 3 end /clone=U1-M-AO1-aez-h-06-0-U1 /clone_end=3 /gb=AI843605 /gi=5477783 /ug=Mm.6844 /len=379                                                             |
| 98931_at             | 0.4335162 | 3.00E-03 | 1297     | Cluster lnc AW123589.U1-M-BH2.1-agi-b-04-0-U1.s1 Mus musculus cDNA, 3 end /clone=U1-M-BH2.1-agi-b-04-0-U1 /clone_end=3 /gb=AW123589 /gi=6099119 /ug=Mm.28670 /len=421                                                        |
| 95239_r_at           | 0.4335162 | 3.00E-03 | 1298     | Cluster lnc AA189811.mf9g08.r1 Mus musculus cDNA, 5 end /clone=IMAGE-637886 /clone_end=5 /gb=AA189811 /gi=1778416 /ug=Mm.1882 /len=365                                                                                       |
| 94747_at             | 0.4335162 | 3.00E-03 | 1299     | Cluster lnc M34397.Interleukin 3 receptor, beta chain 1 /cids=(287,2977) /gb=M34397 /gi=191821 /ug=Mm.14955 /len=313                                                                                                         |
| 98821_at             | 0.4335162 | 3.00E-03 | 1300     | Cluster lnc X74342.Pancreatic and duodenal homeobox gene 1 /cids=(279,1133) /gb=X74342 /gi=144678 /ug=Mm.4949 /len=1463                                                                                                      |
| 160452_at            | 0.4335162 | 3.00E-03 | 1301     | Cluster lnc U00478.Deoxyribonuclease 1 /cids=UNKNOWN /gb=U00478 /gi=437052 /ug=Mm.38470 /len=2867 /NOTE=replacement for probe set(s) 98611_at on MG-U74A                                                                     |
| 103303_at            | 0.4335162 | 3.00E-03 | 1302     | Cluster lnc AA786246.vy06e06.r1 Mus musculus cDNA, 5 end /clone=IMAGE-1284594 /clone_end=5 /gb=AA786246 /gi=2861201 /ug=Mm.21099 /len=494                                                                                    |
| 94321_at             | 0.4335162 | 3.00E-03 | 1303     | Cluster lnc U00830.Keratin complex 1, acidic, gene 10 /cids=(27,1739) /gb=U00830 /gi=52789 /ug=Mm.22662 /len=1944                                                                                                            |
| 97281_at             | 0.4335162 | 3.00E-03 | 1304     | Cluster lnc AI843141.U1-M-AK1-aez-h-03-0-U1.s1 Mus musculus cDNA, 3 end /clone=U1-M-AK1-aez-h-03-0-U1 /clone_end=3 /gb=AI843141 /gi=5477354 /ug=Mm.27969 /len=280                                                            |
