# Supplementary material
Source: PubMed Central journal article supplement (PMC296995)
Supplement: jcinvest_112_12_1796__2.pdf [file jcinvest_112_12_1796__2.pdf]

| Kendall's Tau |           |             |                 |             |                                                                                                                                                      | Mphi | Lys | Mito |
|---------------|-----------|-------------|-----------------|-------------|------------------------------------------------------------------------------------------------------------------------------------------------------|------|-----|------|
| p-value       | ktau      | Probe Set   | Unigene Cluster | Accession # | Gene Description                                                                                                                                     |      |     |      |
| 1.38E-08      | 0.829096  | 160101_at   | Mm.17980        | X56824      | NM_010442 heme oxygenase (decycling) 1                                                                                                               | Yes  |     |      |
| 1.84E-08      | 0.821824  | 100607_at   | Mm.6483         | AF026124    | NM_011116 phospholipase D3                                                                                                                           |      |     |      |
| 9.96E-08      | 0.778187  | 99071_at    | Mm.3999         | L20315      |                                                                                                                                                      | Yes  |     |      |
| 1.31E-07      | 0.770914  | 104531_at   | Mm.2314         | X60304      | NM_011103 protein kinase C, delta                                                                                                                    |      |     |      |
| 1.31E-07      | 0.770914  | 160162_at   | Mm.22632        | AI852545    |                                                                                                                                                      |      |     |      |
| 1.31E-07      | -0.770914 | 103660_at   | Mm.20615        | AF093669    | NM_011068 peroxisomal biogenesis factor 11a                                                                                                          |      |     |      |
| 1.31E-07      | -0.770914 | 95084_f_at  | Mm.196574       | AI844995    | NM_080289 glyoxylate reductase/hydroxypyruvate reductase<br>NM_007702 cell death-inducing DNA fragmentation factor,<br>alpha subunit-like effector A |      |     | Yes  |
| 1.31E-07      | -0.770914 | 99994_at    | Mm.449          | AF041376    |                                                                                                                                                      |      |     |      |
| 1.71E-07      | -0.763641 | 92615_at    | Mm.1103         | AI853615    |                                                                                                                                                      |      |     |      |
| 1.71E-07      | -0.763641 | 92893_at    | Mm.15771        | D90173      | NM_010905 nuclear factor I/A                                                                                                                         |      |     |      |
| 2.24E-07      | 0.756369  | 101793_at   | Mm.150          | X70980      | NM_010186 Fc receptor, IgG, high affinity I                                                                                                          | Yes  |     |      |
| 2.24E-07      | -0.756369 | 95053_s_at  | Mm.29141        | AA674669    | NM_023374 succinate dehydrogenase lp subunit                                                                                                         |      |     | Yes  |
| 2.24E-07      | -0.756369 | 95472_f_at  | Mm.24805        | AI526902    | NM_026219 RIKEN cDNA 2210415M14                                                                                                                      |      |     | Yes  |
| 2.92E-07      | 0.749096  | 100012_at   | Mm.4554         | U29539      | NM_010686 lysosomal-associated protein transmembrane 5                                                                                               | Yes  | Yes |      |
| 2.92E-07      | 0.749096  | 100511_at   | Mm.5202         | AI154249    |                                                                                                                                                      |      |     |      |
| 2.92E-07      | 0.749096  | 103016_s_at | Mm.15819        | X68273      | NM_009853 CD68 antigen                                                                                                                               | Yes  | Yes |      |
| 2.92E-07      | 0.749096  | 93318_at    | Mm.18503        | U91513      | NM_013610 ninjurin 1                                                                                                                                 |      |     |      |
| 2.92E-07      | -0.749096 | 100079_at   | Mm.4537         | AI845556    |                                                                                                                                                      |      |     | Yes  |
| 3.80E-07      | 0.741823  | 100771_at   | Mm.9749         | AF068182    | B cell linker protein essential for normal B-cell development                                                                                        |      |     |      |
| 3.80E-07      | 0.741823  | 95338_s_at  | Mm.2055         | M82831      | NM_008605 macrophage metalloelastase                                                                                                                 | Yes  |     |      |
| 3.80E-07      | 0.741823  | 95339_r_at  | Mm.2055         | M82831      | NM_008605 macrophage metalloelastase                                                                                                                 | Yes  |     |      |
| 3.80E-07      | -0.741823 | 100564_at   | Mm.5731         | AF068199    | NM_010027 D-dopachrome tautomerase                                                                                                                   |      |     |      |
| 4.94E-07      | 0.73455   | 100621_at   | Mm.6586         | AI848825    |                                                                                                                                                      |      |     |      |
| 4.94E-07      | 0.73455   | 93323_at    | Mm.18565        | AB031292    | NM_019755 proteolipid protein 2                                                                                                                      | Yes  |     |      |
| 4.94E-07      | 0.73455   | 94258_at    | Mm.2241         | L07918      | Rho GTP dissociation inhibitor                                                                                                                       | Yes  |     |      |
| 4.94E-07      | -0.73455  | 101525_at   | Mm.8688         | AI848871    |                                                                                                                                                      |      |     |      |
| 4.94E-07      | -0.73455  | 99154_s_at  | Mm.41583        | AW122625    |                                                                                                                                                      |      |     |      |
| 6.39E-07      | 0.727278  | 104388_at   | Mm.2271         | U49513      | NM_011338 small inducible cytokine A9                                                                                                                | Yes  |     |      |
| 6.39E-07      | 0.727278  | 94840_at    | Mm.2284         | U05837      | NM_010421 hexosaminidase A                                                                                                                           |      | Yes |      |
| 6.39E-07      | 0.727278  | 96360_at    | Mm.30016        | AW125498    | NM_133796 expressed sequence C87222<br>NM_013612 solute carrier family 11 (proton-coupled divalent<br>metal ion transporters), membe                 | Yes  |     |      |
| 6.39E-07      | 0.727278  | 96562_at    | Mm.2913         | L13732      |                                                                                                                                                      |      |     |      |
| 6.39E-07      | -0.727278 | 100293_at   | Mm.30502        | AA268823    | NM_007930 ectodermal-neural cortex 1                                                                                                                 |      |     |      |
| 8.26E-07      | 0.720005  | 103507_at   | Mm.2254         | X93328      |                                                                                                                                                      |      |     |      |
| 8.26E-07      | 0.720005  | 95466_at    | Mm.141741       | AI837006    | NM_028071 coactosin-like protein                                                                                                                     |      |     |      |
| 8.26E-07      | 0.720005  | 96056_at    | Mm.262          | X80638      | NM_007484 ras homolog 9 (RhoC)                                                                                                                       |      |     |      |
| 1.06E-06      | 0.712732  | 102204_at   | Mm.67919        | L36435      |                                                                                                                                                      |      |     |      |
| 1.06E-06      | 0.712732  | 94208_at    | Mm.182959       | AW045202    |                                                                                                                                                      |      |     |      |
| 1.37E-06      | 0.705459  | 104308_at   | Mm.22378        | AI035495    | NM_021334 integrin alpha X                                                                                                                           | Yes  |     |      |
| 1.37E-06      | 0.705459  | 92471_i_at  | Mm.42124        | AF099973    | NM_011408 schlafen 2                                                                                                                                 |      |     |      |
| 1.37E-06      | -0.705459 | 101538_i_at | Mm.120807       | AW226939    | NM_053200 carboxylesterase 3<br>NM_008149 glycerol-3-phosphate acyltransferase,<br>mitochondrial                                                     |      |     | Yes  |
| 1.37E-06      | -0.705459 | 101867_at   | Mm.87773        | U11680      |                                                                                                                                                      |      |     | Yes  |
| 1.37E-06      | -0.705459 | 95620_at    | Mm.2804         | AW120882    |                                                                                                                                                      |      |     | Yes  |
| 1.48E-06      | 0.703098  | 102851_s_at | Mm.1484         | M68902      | NM_013545 hemopoietic cell phosphatase                                                                                                               | Yes  |     |      |
| 1.75E-06      | 0.698186  | 100328_s_at | Mm.87801        | U96684      | NM_011090 paired-Ig-like receptor A3                                                                                                                 | Yes  |     |      |
| 1.75E-06      | 0.698186  | 103579_at   | Mm.1972         | X53247      | NM_009008                                                                                                                                            | Yes  |     |      |
| 1.75E-06      | 0.698186  | 103662_at   | Mm.2068         | U59488      | NM_008677 neutrophil cytosolic factor 4                                                                                                              |      |     |      |
| 1.75E-06      | 0.698186  | 104023_at   | Mm.2699         | AW060457    |                                                                                                                                                      | Yes  |     |      |
| 1.75E-06      | 0.698186  | 93598_at    | Mm.20847        | AI840437    | NM_024225 sorting nexin 5                                                                                                                            |      |     |      |

## Supplemental Table 2

| Kendall's Tau |           |             |                 |             |                                                                                        | Mphi | Lyso | Mito |
|---------------|-----------|-------------|-----------------|-------------|----------------------------------------------------------------------------------------|------|------|------|
| p-value       | ktau      | Probe Set   | Unigene Cluster | Accession # | Gene Description                                                                       |      |      |      |
| 1.75E-06      | 0.698186  | 95151_at    | Mm.29475        | AW061307    | NM_023320 TNF intracellular domain-interacting protein                                 |      |      |      |
|               |           |             |                 |             | NM_019432 voltage-dependent calcium channel gamma subunit-like protein                 |      |      |      |
| 1.75E-06      | 0.698186  | 95465_s_at  | Mm.24750        | AI849587    | NM_009777 complement component 1, q subcomponent, beta polypeptide                     | Yes  |      |      |
| 1.75E-06      | 0.698186  | 96020_at    | Mm.2570         | M22531      |                                                                                        |      |      |      |
| 1.75E-06      | -0.698186 | 101539_f_at | Mm.120807       | AW226939    | NM_053200 carboxylesterase 3                                                           |      |      |      |
| 1.75E-06      | -0.698186 | 104752_at   | Mm.24772        | AB028863    | NM_019735 cDNA sequence AB028863                                                       |      |      |      |
|               |           |             |                 |             | NM_020615 ATP synthase, H+ transporting, mitochondrial F1 complex, gamma polypeptide 1 |      |      | Yes  |
| 1.75E-06      | -0.698186 | 92799_g_at  | Mm.12677        | AA870675    |                                                                                        |      |      | Yes  |
| 1.75E-06      | -0.698186 | 93143_at    | Mm.5185         | AI844196    |                                                                                        |      |      | Yes  |
| 1.75E-06      | -0.698186 | 94365_at    | Mm.25285        | AA710175    |                                                                                        |      |      |      |
| 2.25E-06      | 0.690914  | 102914_s_at | Mm.196770       | U23778      | NM_007534 B-cell leukemia/lymphoma 2 related protein A1b                               | Yes  |      |      |
|               |           |             |                 |             | NM_022964 Williams-Beuren syndrome chromosome region 5 homolog                         |      |      |      |
| 2.25E-06      | 0.690914  | 103690_at   | Mm.23955        | AW125574    |                                                                                        | Yes  |      |      |
| 2.25E-06      | 0.690914  | 94278_at    | Mm.153911       | D37837      | NM_008879 plastin 2, L                                                                 | Yes  |      |      |
| 2.25E-06      | 0.690914  | 95661_at    | Mm.2956         | L08115      | NM_007657 CD9 antigen                                                                  |      |      |      |
| 2.25E-06      | -0.690914 | 160661_at   | Mm.21110        | AI840615    |                                                                                        |      |      | Yes  |
| 2.25E-06      | -0.690914 | 94526_at    | Mm.29032        | AI848453    | NM_134007 expressed sequence AU043990                                                  |      |      |      |
| 2.25E-06      | -0.690914 | 96730_at    | Mm.28867        | X81323      | NM_009418 tripeptidyl peptidase II                                                     |      |      |      |
| 2.87E-06      | 0.683641  | 100927_at   | Mm.6105         | U28960      | NM_011125 phospholipid transfer protein                                                |      |      |      |
| 2.87E-06      | 0.683641  | 160489_at   | Mm.4348         | L24118      | NM_009396 tumor necrosis factor induced protein 2                                      | Yes  |      |      |
| 2.87E-06      | 0.683641  | 160698_s_at | Mm.2314         | AB011812    | NM_011103 protein kinase C, delta                                                      |      |      |      |
| 2.87E-06      | 0.683641  | 93425_at    | Mm.6479         | AF028725    | NM_012057 interferon regulatory factor 5                                               |      |      |      |
| 2.87E-06      | 0.683641  | 94425_at    | Mm.2639         | AB007599    | NM_010745 lymphocyte antigen 86                                                        | Yes  |      |      |
|               |           |             |                 |             | NM_033617 ATPase, H+ transporting, lysosomal 21kDa, V0 subunit B                       | Yes  | Yes  |      |
| 2.87E-06      | 0.683641  | 98104_at    | Mm.3479         | AI842889    |                                                                                        |      |      |      |
| 2.87E-06      | -0.683641 | 102561_at   |                 | U59282      |                                                                                        |      |      |      |
| 2.87E-06      | -0.683641 | 103087_at   | Mm.17339        | L02331      | NM_133670 sulfotransferase, phenol preferring 1                                        |      |      |      |
| 2.87E-06      | -0.683641 | 92541_at    | Mm.1000         | X12973      |                                                                                        |      |      |      |
| 2.87E-06      | -0.683641 | 93392_at    | Mm.6254         | AB010742    | NM_009464 uncoupling protein 3, mitochondrial                                          |      |      | Yes  |
| 2.87E-06      | -0.683641 | 94241_at    | Mm.182271       | AI837229    |                                                                                        |      |      |      |
| 3.65E-06      | 0.676368  | 100059_at   | Mm.448          | M31775      |                                                                                        | Yes  |      |      |
| 3.65E-06      | 0.676368  | 101047_at   | Mm.178550       | AW123697    |                                                                                        |      |      |      |
| 3.65E-06      | 0.676368  | 102326_at   | Mm.10729        | AB002664    | NM_010877 neutrophil cytosolic factor 2                                                |      |      |      |
| 3.65E-06      | 0.676368  | 102353_at   | Mm.1137         | M31039      | NM_008404 integrin beta 2                                                              | Yes  |      |      |
| 3.65E-06      | 0.676368  | 102957_at   | Mm.1781         | U20159      | NM_010696 lymphocyte cytosolic protein 2                                               | Yes  |      |      |
| 3.65E-06      | 0.676368  | 103365_s_at | Mm.10081        | AW215551    | NM_010296 GLI-Kruppel family member GLI                                                |      |      |      |
| 3.65E-06      | 0.676368  | 103394_at   | Mm.1870         | U72680      | NM_008761 related to ion channel                                                       |      |      |      |
| 3.65E-06      | 0.676368  | 103448_at   | Mm.21567        | M83218      | NM_013650 S100 calcium binding protein A8 (calgranulin A)                              | Yes  |      |      |
| 3.65E-06      | 0.676368  | 160406_at   | Mm.3109         | AJ006033    | NM_007802 cathepsin K                                                                  | Yes  | Yes  |      |
| 3.65E-06      | 0.676368  | 93261_at    | Mm.17185        | AJ000990    | NM_011175 protease, cysteine, 1                                                        |      |      |      |
| 3.65E-06      | 0.676368  | 95142_s_at  | Mm.2945         | U10407      | NM_009798 capping protein beta 1                                                       |      |      |      |
| 3.65E-06      | 0.676368  | 98059_s_at  | Mm.3438         | D49733      | NM_019390 lamin A                                                                      |      |      |      |
| 3.65E-06      | -0.676368 | 101858_at   | Mm.871          | AF015770    | NM_009053 radical fringe gene homolog,                                                 |      |      |      |
| 3.65E-06      | -0.676368 | 101898_s_at | Mm.88795        | X16426      | NM_010391 histocompatibility 2, Q region locus 10                                      |      |      |      |
| 3.65E-06      | -0.676368 | 102099_f_at | Mm.86933        | AI843637    |                                                                                        |      |      |      |
| 3.95E-06      | -0.673954 | 99153_at    | Mm.41574        | AI854607    |                                                                                        |      |      | Yes  |
| 4.64E-06      | 0.669095  | 93666_at    | Mm.29266        | M64360      | NM_008505 LIM only 2                                                                   | Yes  |      |      |
| 4.64E-06      | 0.669095  | 96605_at    | Mm.27061        | AI787183    |                                                                                        |      |      |      |
| 4.64E-06      | 0.669095  | 97444_at    | Mm.30241        | AI844520    | NM_023065 interferon gamma inducible protein 30                                        | Yes  | Yes  |      |
| 4.64E-06      | -0.669095 | 102958_at   | Mm.179          | U82441      | NM_010095 early B-cell factor 2                                                        |      |      |      |
| 4.64E-06      | -0.669095 | 93582_at    | Mm.20634        | AF080580    | NM_009940 demethyl-Q 7                                                                 |      |      | Yes  |
| 4.64E-06      | -0.669095 | 95072_at    | Mm.29196        | AW121892    | NM_025567 cytochrome c-1                                                               |      |      | Yes  |
| 4.64E-06      | -0.669095 | 96909_at    | Mm.3014         | AI849803    |                                                                                        |      |      | Yes  |
| 4.64E-06      | -0.669095 | 98575_at    | Mm.3760         | X13135      |                                                                                        |      |      |      |
| 5.87E-06      | 0.661823  | 101055_at   | Mm.7046         | J05261      | NM_008906 protective protein for beta-galactosidase                                    | Yes  | Yes  |      |
| 5.87E-06      | 0.661823  | 102362_i_at | Mm.1167         | U20735      | NM_008416 Jun-B oncogene                                                               |      |      |      |

**Supplemental Table 2 (cont)**

**Supplemental Data - Table 2** The 100 adipose tissue transcripts whose expression most significantly correlated with body mass are listed with uncorrected p-values, Kendall tau statistics, Affymetrix probe set identifiers, GenBank Accession numbers. A positive Kendall's tau statistic indicates a transcript with a positive correlation with body mass, while a negative one indicates a negative correlation. Transcripts that are expressed preferentially within macrophages (Mphi) and genes whose products encode lysosomal (Lys) or mitochondrial (Mito) are proteins noted.
