# Supplementary material
Source: PubMed Central journal article supplement (PMC296995)
Supplement: jcinvest_112_12_1796__4.pdf [file jcinvest_112_12_1796__4.pdf]

| Sample      | Acrp30     | F4/80     | Csf1r      | Cd68       | TNF-a      | iNOS       |
|-------------|------------|-----------|------------|------------|------------|------------|
| Adipocytes  | 5.17E-05 ± |           | 1.49E-03 ± | 4.77E-03 ± | 1.34E-03 ± | 1.42E-04 ± |
| Day 0       | 3.61E-06   | ND        | 6.92E-04   | 7.57E-04   | 1.24E-03   | 1.91E-05   |
| Adipocytes  | 4.19E-01 ± |           | 4.40E-04 ± | 4.51E-03 ± | 8.49E-04 ± | 5.13E-04 ± |
| Day 2       | 2.61E-02   | ND        | 9.82E-05   | 1.03E-03   | 1.19E-03   | 7.96E-04   |
| Adipocytes  | 4.38E+00 ± |           | 1.57E-03 ± | 4.99E-03 ± | 3.50E-04 ± | 5.62E-04 ± |
| Day 4       | 2.02E+00   | ND        | 8.15E-04   | 6.44E-04   | 4.02E-04   | 3.41E-04   |
| Adipocytes  | 2.77E+00 ± |           | 8.37E-04 ± | 6.72E-03 ± | 3.74E-04 ± | 1.50E-03 ± |
| Day 6       | 5.31E-01   | ND        | 9.39E-05   | 3.25E-03   | 1.50E-04   | 1.90E-03   |
| Adipocytes  | 9.20E+00 ± |           | 1.40E-03 ± | 4.60E-03 ± | 2.82E-04 ± | 2.20E-03 ± |
| Day 12      | 2.42E+00   | ND        | 8.64E-04   | 1.21E-03   | 3.99E-04   | 4.28E-04   |
| Adipocytes  | 9.02E-01 ± |           | 9.76E-04 ± | 1.46E-02 ± | 8.48E-07 ± | 1.27E-02 ± |
| Day 24      | 7.07E-01   | ND        | 6.83E-04   | 1.41E-02   | 7.36E-07   | 1.73E-02   |
|             | 8.63E-04 ± | 1.07E+01± | 1.32E+01 ± | 1.02E+01 ± | 4.32E+00 ± | 4.41E-01 ± |
| Macrophages | 1.05E-04   | 1.55E+00  | 7.28E+00   | 1.84E+00   | 2.42E+00   | 1.79E-01   |

**Table .** 3T3-L1 cells were differentiated in-vitro. Gene expression was measured using quantitative PCR at different time points and compared to gene expression in isolated adipose tissue macrophages. Data are presented as means ± SD. Not detectable
